# Supplementary material for: A Cu-promoted reaction of β-keto trifluoromethyl amines enabling stereoselective synthesis of trifluoromethylated aziridines
Source: Royal Society of Chemistry journal article supplement (doi:10.1039/d3ob00714f), 2023-01-01

## Supporting Information

### **Cu-Promoted Reaction of $\beta$ -Keto Trifluoromethyl Amines Enabling Stereoselective Synthesis of Trifluoromethylated Aziridines**

Nana Wang,<sup>a</sup> Youlong Du,<sup>a</sup> Haibo Mei,<sup>a,\*</sup> Jorge Escorihuela<sup>b</sup> and Jianlin Han<sup>a,\*</sup>

<sup>a</sup>Jiangsu Co-Innovation Center of Efficient Processing and Utilization of Forest Resources, College of Chemical Engineering, Nanjing Forestry University, Nanjing 210037, China.

<sup>b</sup> Departamento de Química Orgánica, Universitat de València, Avda. Vicente Andrés Estellés s/n, Burjassot 46100, Valencia, Spain

Email: meihb@njfu.edu.cn; hanjl@njfu.edu.cn

|                                                                              |            |
|------------------------------------------------------------------------------|------------|
| <b>1. General information .....</b>                                          | <b>S2</b>  |
| <b>2. General procedure for the preparation of amines 1a-u.....</b>          | <b>S2</b>  |
| <b>3. Table S1. Optimization of reaction conditions .....</b>                | <b>S4</b>  |
| <b>4. General procedure for synthesis of aziridine.....</b>                  | <b>S5</b>  |
| <b>5. Large scale synthesis .....</b>                                        | <b>S5</b>  |
| <b>6. Reaction conducted in DMF/D<sub>2</sub>O.....</b>                      | <b>S6</b>  |
| <b>7. X-ray crystallography of 2a .....</b>                                  | <b>S7</b>  |
| <b>8. Characterization data of compounds 2.....</b>                          | <b>S8</b>  |
| <b>9. Computational details.....</b>                                         | <b>S16</b> |
| <b>10. <sup>1</sup>H, <sup>13</sup>C and <sup>19</sup>F NMR spectra.....</b> | <b>S18</b> |



## 1. General information

All the commercial reagents including solvents were used directly without further purification. Amines **1a-y** were synthesized according to the literature<sup>1</sup>. All the experiments were monitored by thin layer chromatography (TLC) with UV light. The TLC employed 0.25 mm silica gel coated on glass plates. Purification of products was carried out by silica gel 60 F-254 TLC plates of 20 cm × 20 cm and column chromatography with silica gel 60 (300-400 mesh). Melting points were recorded without correction on RY-1G of Tianjin Xintianguang instrument company. NMR spectra were recorded on Bruker 400 MHz and 600 MHz spectrometers. High resolution mass spectra (HRMS) were measured on Agilent 6210 ESI/TOF MS instrument. The X-ray data were collected at 100 K on a Rigaku Oxford Diffraction Supernova Dual Source, Cu at Zero equipped with an AtlasS2 CCD using Cu K $\alpha$  radiation.

### Reference:

(1) Mei, H.; Xiong, Y.; Han, J.; Pan, Y. *Org. Biomol. Chem.* **2011**, *9*, 1402-1406.

## 2. General procedure for the preparation of amines **1a-u**<sup>1</sup>

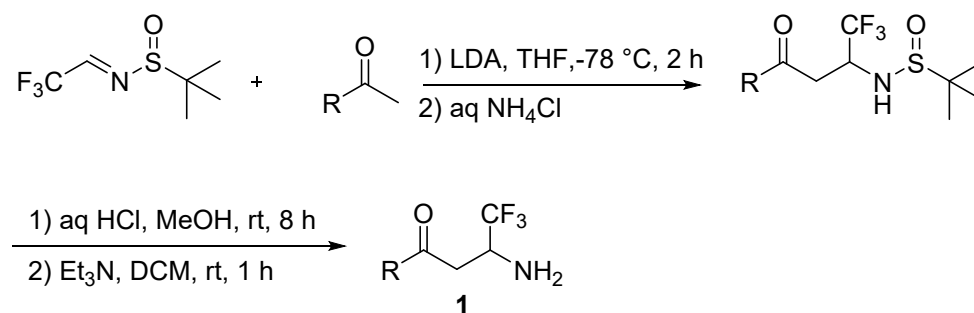

Into a vial was taken ketone (8.5 mmol, 1.7 equiv) and anhydrous THF (20.0 mL). The reaction vial was cooled to  $-78\text{ }^\circ\text{C}$  and LDA (2 M in THF, 4.68 mL) was added dropwise with stirring. After 40 min at  $-78\text{ }^\circ\text{C}$ , sulfonylimine (5.0 mmol) dissolved in anhydrous THF (5.0 mL) was added dropwise.

Stirring was continued at  $-78\text{ }^{\circ}\text{C}$  for 2 h, then the reaction was quenched with saturated  $\text{NH}_4\text{Cl}$  (10.0 mL), followed by  $\text{H}_2\text{O}$  (10.0 mL) and the mixture was brought to room temperature. The organic layer was taken and the aqueous layer was extracted with EtOAc ( $3 \times 15\text{ mL}$ ). The combined organic layers were dried with anhydrous  $\text{Na}_2\text{SO}_4$ , filtered and the solvent was removed to give the crude Mannich adduct, which was purified by the silica gel column (petroleum ether:EtOAc = 4 : 1). Mannich adduct (1.0 mmol) and MeOH (10 mL) were placed in a round-bottom flask and aq HCl (36%, 2 mL) was added. The reaction was stirred at room temperature for 8 h. Volatiles were removed under reduced pressure. The residue was dissolved in  $\text{CH}_2\text{Cl}_2$  (10 mL) and  $\text{Et}_3\text{N}$  (30.0 mmol) was added. The mixture was stirred at room temperature for 1 h, then  $\text{H}_2\text{O}$  (10 mL) was added. The organic layer was taken, washed with  $\text{H}_2\text{O}$  ( $3 \times 10\text{ mL}$ ), dried with anhydrous  $\text{Na}_2\text{SO}_4$ , filtered and the solvent was removed to give the crude product **1**, which was purified by the silica gel column (petroleum ether:EtOAc = 4 : 1).

### 3. Table S1. Optimization of reaction conditions<sup>a</sup>

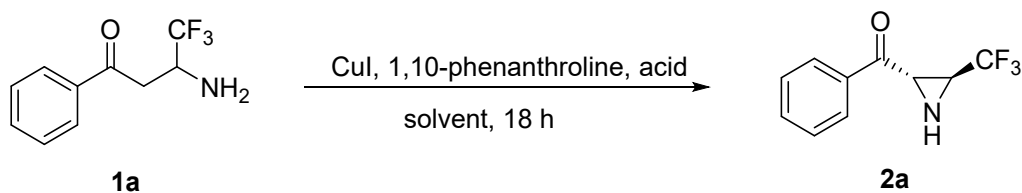

| entry | CuI<br>(equiv) | phen<br>(equiv) | acid<br>(equiv)                   | solvent                       | T (°C) | yield (%) <sup>b</sup> |
|-------|----------------|-----------------|-----------------------------------|-------------------------------|--------|------------------------|
| 1     | 0.5            | 0.5             | 1                                 | DMF: H <sub>2</sub> O = 10: 1 | rt     | 65                     |
| 2     | 0              | 1               | 1                                 | DMF: H <sub>2</sub> O = 10: 1 | rt     | nr                     |
| 3     | 1              | 1               | 1                                 | DMF: H <sub>2</sub> O = 10: 1 | rt     | 79                     |
| 4     | 2              | 2               | 1                                 | DMF: H <sub>2</sub> O = 10: 1 | rt     | 72                     |
| 5     | 1              | 1               | 0                                 | DMF: H <sub>2</sub> O = 10: 1 | rt     | 53                     |
| 6     | 1              | 1               | 0.5                               | DMF: H <sub>2</sub> O = 10: 1 | rt     | 72                     |
| 7     | 1              | 1               | 2                                 | DMF: H <sub>2</sub> O = 10: 1 | rt     | 79                     |
| 8     | 1              | 1               | 1                                 | DMF                           | rt     | 57                     |
| 9     | 1              | 1               | 1                                 | DCM                           | rt     | trace                  |
| 10    | 1              | 1               | 1                                 | THF                           | rt     | trace                  |
| 11    | 1              | 1               | 1                                 | DCM: H <sub>2</sub> O = 10: 1 | rt     | trace                  |
| 12    | 1              | 1               | 1                                 | THF: H <sub>2</sub> O = 10: 1 | rt     | 36                     |
| 13    | 1              | 1               | 1                                 | DMF: H <sub>2</sub> O = 10: 1 | 60     | 54                     |
| 14    | 1              | 1               | 1                                 | DMF: H <sub>2</sub> O = 10: 1 | 0      | 37                     |
| 15    | 1              | 1               | 1                                 | DMF: H <sub>2</sub> O = 10: 1 | rt     | 58 <sup>c</sup>        |
| 16    | 1              | 1               | CH <sub>3</sub> CO <sub>2</sub> H | DMF: H <sub>2</sub> O = 10: 1 | rt     | 77 <sup>d</sup>        |

17      1      1      H<sub>2</sub>SO<sub>4</sub>      DMF: H<sub>2</sub>O = 10: 1      rt      13<sup>e</sup>

---

<sup>a</sup> Reaction conditions:  $\beta$ -amino ketone **1a** (0.1 mmol), CuI, 1,10-phenanthroline, acid and solvent (2.2 mL) were dissolved in a vial, and stirred for 18 h. <sup>b</sup> Isolated yield based on amine **1a**. <sup>c</sup> Under nitrogen atmosphere. <sup>d</sup> CH<sub>3</sub>CO<sub>2</sub>H (0.1 mmol) was used. <sup>e</sup> H<sub>2</sub>SO<sub>4</sub> (0.1 mmol) was used.

#### 4. General procedure for synthesis of aziridine

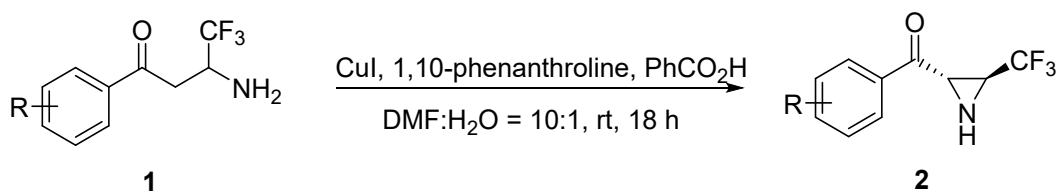

$\beta$ -Keto amine **1** (0.2 mmol), CuI (0.2 mmol), 1,10-phenanthroline (0.2 mmol), PhCO<sub>2</sub>H (0.2 mmol) and DMF/H<sub>2</sub>O (4.4 mL, DMF : H<sub>2</sub>O = 10:1) were taken into a vial. The mixture was stirred at room temperature. After 18 h, the reaction was quenched with H<sub>2</sub>O (20 mL). Then organic layer was taken and the aqueous layer was extracted with EtOAc (3  $\times$  10 mL). The combined organic layers were dried with anhydrous Na<sub>2</sub>SO<sub>4</sub>, filtered and the solvent was removed in vacuum. The product **2** was purified by TLC plate of 20 cm  $\times$  20 cm using petroleum ether/ethyl acetate (8:1, v/v) as eluent.

#### 5. Large scale synthesis

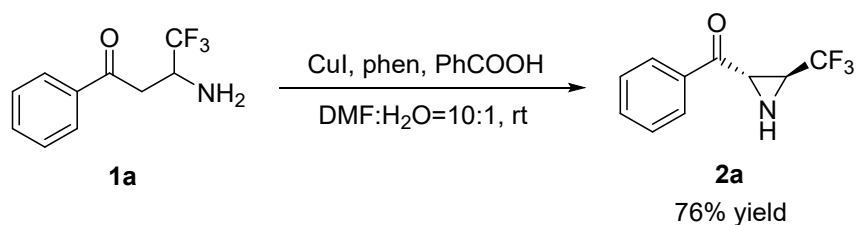

Amine **1a** (5 mmol), CuI (5 mmol), phen (5 mmol), PhCO<sub>2</sub>H (5 mmol) and DMF/H<sub>2</sub>O (22 mL, DMF:H<sub>2</sub>O = 10:1) were taken into a flask. The mixture was stirred at room temperature. After 18 h, the reaction was quenched with H<sub>2</sub>O (30 mL). Then organic layer was taken and the aqueous

layer was extracted with EtOAc ( $3 \times 20$  mL). The combined organic layers were dried with anhydrous  $\text{Na}_2\text{SO}_4$ , filtered and the solvent was removed in vacuum. The product **2a** was purified by column chromatography using petroleum ether/ethyl acetate (8:1, v/v) as eluent (0.817 g, 76% yield).

## 6. Reaction conducted in DMF/D<sub>2</sub>O

$\beta$ -Keto amine **1a** (0.1 mmol), CuI (0.1 mmol), 1,10-phenanthroline (0.1 mmol),  $\text{PhCO}_2\text{H}$  (0.1 mmol) and DMF/D<sub>2</sub>O (2.2 mL, DMF:D<sub>2</sub>O = 10:1) were taken into a vial. The mixture was stirred at room temperature. After 18 h, the reaction was quenched with H<sub>2</sub>O (20 mL). Then organic layer was taken and the aqueous layer was extracted with EtOAc ( $3 \times 10$  mL). The combined organic layers were dried with anhydrous  $\text{Na}_2\text{SO}_4$ , filtered and the solvent was removed in vacuum. The product **2a** was purified by TLC plate of 20 cm  $\times$  20 cm using petroleum ether/ethyl acetate (8:1, v/v) as eluent.

pdata/1

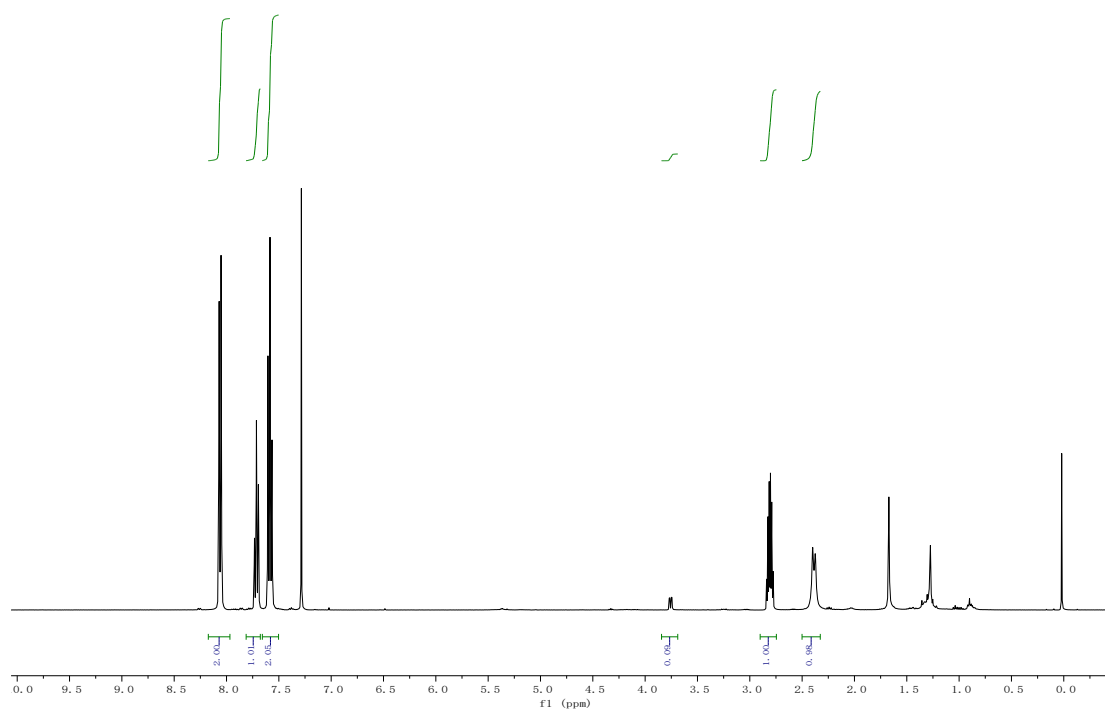

<sup>1</sup>H NMR of **D-2a** (400 MHz, CDCl<sub>3</sub>)





## 7. X-ray crystallography of 2a

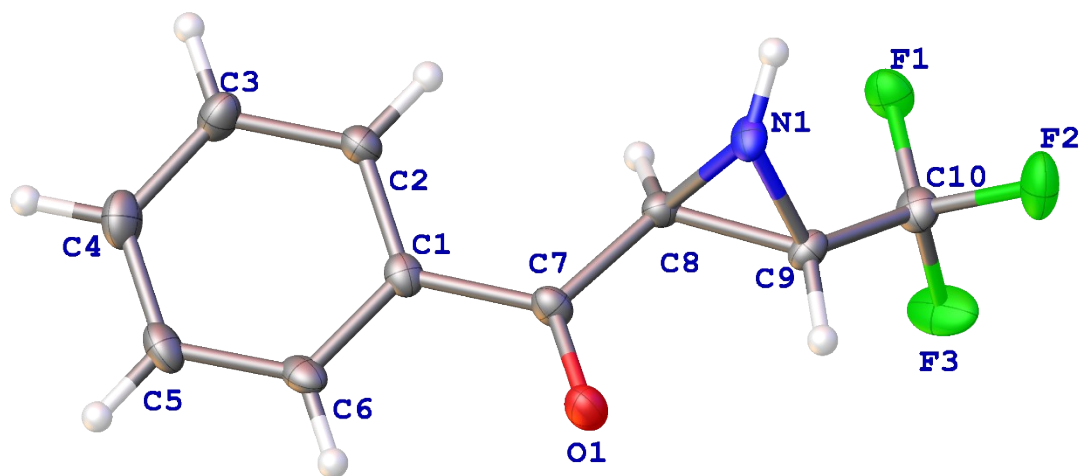

**Figure S2.** ORTEP diagram showing of **2a**

(CCDC number is 2245954, the ellipsoids are drawn at a 30% probability level)

Suitable crystals of compound **2a** were obtained by slowly evaporating a mixture of petroleum ether and ethyl acetate solution at ambient temperature.

## 8. Characterization data of 2

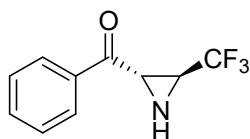

Compound **2a**: 34.0 mg, 79% yield, white solid, mp 80-82 °C. <sup>1</sup>H NMR (400 MHz, CDCl<sub>3</sub>): δ = 8.06-8.04 (m, 2H), 7.72-7.68 (m, 1H), 7.59-7.55 (m, 2H), 3.75 (d, *J* = 8.00 Hz, 1H), 2.81-2.78 (m, 1H), 2.41-2.37 (m, 1H). <sup>13</sup>C NMR (100 MHz, CDCl<sub>3</sub>): δ = 194.1, 135.1, 134.6, 129.1, 128.5, 127.1 (q, *J* = 271.5 Hz), 39.1 (q, *J* = 40.3 Hz), 34.6. <sup>19</sup>F NMR (376 MHz, CDCl<sub>3</sub>): δ = -71.5 (s, 3F). HRMS (ESI) *m/z*: [M+H]<sup>+</sup> calcd for C<sub>10</sub>H<sub>9</sub>F<sub>3</sub>NO<sup>+</sup> 216.0631, found 216.0625.

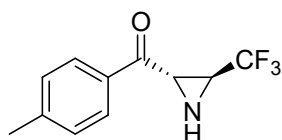

Compound **2b**: 36.9 mg, 81% yield, white solid, mp 74-76 °C. <sup>1</sup>H NMR (400 MHz, CDCl<sub>3</sub>): δ = 7.97 (d, *J* = 8.24 Hz, 2H), 7.38 (d, *J* = 8.00 Hz, 2H), 3.74-3.72 (m, 1H), 2.80-2.75 (m, 1H), 2.49 (s, 3H), 2.39-2.35 (m, 1H). <sup>13</sup>C NMR (100 MHz, CDCl<sub>3</sub>): δ = 193.5, 145.9, 132.6, 129.8, 128.6, 124.4 (d, *J* = 271.7 Hz), 38.6 (d, *J* = 40.2 Hz), 34.5, 21.9. <sup>19</sup>F NMR (376 MHz, CDCl<sub>3</sub>): δ = -71.5 (s, 3F). HRMS (ESI) *m/z*: [M+H]<sup>+</sup> calcd for C<sub>11</sub>H<sub>11</sub>F<sub>3</sub>NO<sup>+</sup> 230.0787, found 230.0785.

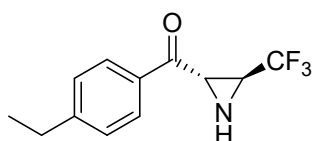

Compound **2c**: 42.5 mg, 87% yield, white solid, mp 47-49 °C. <sup>1</sup>H NMR (400 MHz, CDCl<sub>3</sub>): δ = 8.00 (d, *J* = 8.04 Hz, 2H), 7.40 (d, *J* = 7.92 Hz, 2H), 3.74 (d, *J* = 7.92 Hz, 1H), 2.80-2.74 (m, 3H), 2.40-2.36 (m, 1H), 1.32-1.28 (m, 3H). <sup>13</sup>C NMR (100 MHz, CDCl<sub>3</sub>): δ = 193.5, 152.0, 132.8, 128.7, 128.6, 124.4 (d, *J* = 271.9 Hz), 38.9 (q, *J* = 40.3 Hz), 34.5, 29.1, 15.1. <sup>19</sup>F NMR (376 MHz, CDCl<sub>3</sub>): δ = -71.5 (s, 3F). HRMS (ESI) *m/z*: [M+H]<sup>+</sup> calcd for C<sub>12</sub>H<sub>13</sub>F<sub>3</sub>NO<sup>+</sup> 244.0944, found 244.0942.

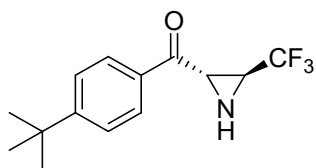

Compound **2d**: 41.7 mg, 77% yield, white solid, mp 68-71 °C.  $^1\text{H}$  NMR (400 MHz,  $\text{CDCl}_3$ ):  $\delta$  = 8.02 (d,  $J$  = 8.40 Hz, 2H), 7.60 (d,  $J$  = 8.44 Hz, 2H), 3.76-3.73 (m, 1H), 2.80-2.74 (m, 1H), 2.41-2.36 (m, 1H), 1.39 (s, 9H).  $^{13}\text{C}$  NMR (100 MHz,  $\text{CDCl}_3$ ):  $\delta$  = 193.5, 158.8, 132.5, 128.5, 127.1 (q,  $J$  = 271.8 Hz), 126.1, 38.9 (q,  $J$  = 40.2 Hz), 35.4, 34.5, 31.0.  $^{19}\text{F}$  NMR (376 MHz,  $\text{CDCl}_3$ ):  $\delta$  = -71.5 (s, 3F). HRMS (ESI)  $m/z$ :  $[\text{M}+\text{H}]^+$  calcd for  $\text{C}_{14}\text{H}_{17}\text{F}_3\text{NO}^+$  272.1257, found 272.1256.

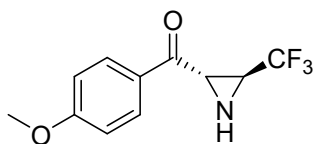

Compound **2e**: 44.7 mg, 91% yield, white solid, mp 64-66 °C.  $^1\text{H}$  NMR (400 MHz,  $\text{CDCl}_3$ ):  $\delta$  = 8.05 (d,  $J$  = 8.40 Hz, 2H), 7.04 (d,  $J$  = 8.44 Hz, 2H), 3.92 (s, 3H), 3.70 (d,  $J$  = 7.88 Hz, 1H), 2.76 (s, 1H), 2.36 (s, 1H).  $^{13}\text{C}$  NMR (100 MHz,  $\text{CDCl}_3$ ):  $\delta$  = 192.1, 164.8, 130.9, 128.1, 127.2 (t,  $J$  = 271.8 Hz), 114.3, 55.6, 38.8 (q,  $J$  = 40.3 Hz), 34.2.  $^{19}\text{F}$  NMR (376 MHz,  $\text{CDCl}_3$ ):  $\delta$  = -71.4 (s, 3F). HRMS (ESI)  $m/z$ :  $[\text{M}+\text{H}]^+$  calcd for  $\text{C}_{11}\text{H}_{10}\text{F}_3\text{N}_2\text{O}^+$  246.0736, found 246.0737.

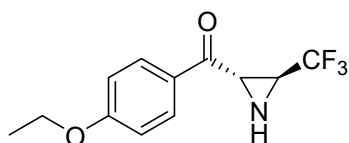

Compound **2f**: 46.9 mg, 90% yield, white solid, mp 103-106 °C.  $^1\text{H}$  NMR (400 MHz,  $\text{CDCl}_3$ ):  $\delta$  = 8.04-8.00 (m, 2H), 7.02-6.99 (m, 2H), 4.17-4.12 (m, 2H), 3.70-3.67 (m, 1H), 2.78-2.74 (m, 1H), 2.37-2.33 (m, 1H), 1.49 (t,  $J$  = 7.00 Hz, 3H).  $^{13}\text{C}$  NMR (100 MHz,  $\text{CDCl}_3$ ):  $\delta$  = 192.0, 164.2, 130.9, 127.9, 124.5 (d,  $J$  = 271.6 Hz), 114.7, 64.0, 38.7 (q,  $J$  = 40.3 Hz), 34.2, 14.6.  $^{19}\text{F}$  NMR (376 MHz,  $\text{CDCl}_3$ ):  $\delta$  = -71.4 (s, 3F). HRMS (ESI)  $m/z$ :  $[\text{M}+\text{H}]^+$  calcd for  $\text{C}_{12}\text{H}_{13}\text{F}_3\text{NO}_2^+$  260.0893, found 260.0892.

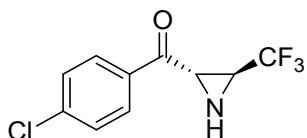

Compound **2g**: 31.9 mg, 64% yield, white solid, mp 65-68 °C. <sup>1</sup>H NMR (400 MHz, CDCl<sub>3</sub>): δ = 8.01-7.97 (m, 2H), 7.56-7.53 (m, 2H), 3.70-3.68 (m, 1H), 2.84-2.78 (m, 1H), 2.41 (t, *J* = 8.52 Hz, 1H). <sup>13</sup>C NMR (100 MHz, CDCl<sub>3</sub>): δ = 193.0, 141.4, 133.4, 129.8, 129.5, 127.0 (q, *J* = 271.7 Hz), 39.2 (q, *J* = 40.5 Hz), 34.5. <sup>19</sup>F NMR (376 MHz, CDCl<sub>3</sub>): δ = -71.5 (s, 3F). HRMS (ESI) *m/z*: [M+H]<sup>+</sup> calcd for C<sub>10</sub>H<sub>8</sub>ClF<sub>3</sub>NO<sup>+</sup> 250.0241, found 250.0240.

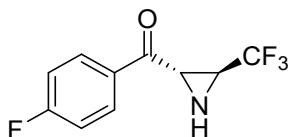

Compound **2h**: 33.8 mg, 72% yield, white solid, mp 73-76 °C. <sup>1</sup>H NMR (400 MHz, CDCl<sub>3</sub>): δ = 8.11-8.07 (m, 2H), 7.27-7.23 (m, 2H), 3.71-3.69 (m, 1H), 2.83-2.78 (m, 1H), 2.41 (t, *J* = 8.56 Hz, 1H). <sup>13</sup>C NMR (100 MHz, CDCl<sub>3</sub>): δ = 192.5, 168.0 (d, *J* = 256.3 Hz), 131.6 (d, *J* = 3.1 Hz), 131.3 (d, *J* = 9.8 Hz), 127.0 (q, *J* = 271.4 Hz), 116.5 (d, *J* = 22.1 Hz), 39.1 (q, *J* = 40.4 Hz), 34.5. <sup>19</sup>F NMR (376 MHz, CDCl<sub>3</sub>): δ = -71.5 (s, 3F), -101.8 (s, 1F). HRMS (ESI) *m/z*: [M+H]<sup>+</sup> calcd for C<sub>11</sub>H<sub>8</sub>F<sub>3</sub>N<sub>2</sub><sup>+</sup> 234.0537, found 234.0530.

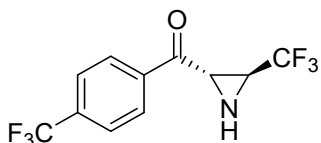

Compound **2i**: 37.4 mg, 66% yield, white solid, mp 48-52 °C. <sup>1</sup>H NMR (400 MHz, CDCl<sub>3</sub>): δ = 8.17 (d, *J* = 8.12 Hz, 2H), 7.85 (d, *J* = 8.20 Hz, 2H), 3.75-3.73 (m, 1H), 2.90-2.82 (m, 1H), 2.45-2.41 (m, 1H). <sup>13</sup>C NMR (100 MHz, CDCl<sub>3</sub>): δ = 193.6, 137.6, 136.0 (d, *J* = 33.0 Hz), 128.8, 127.4 (q, *J* = 271.2 Hz), 126.9 (q, *J* = 271.8 Hz), 126.2 (q, *J* = 3.6 Hz), 39.5 (q, *J* = 40.6 Hz), 34.8. <sup>19</sup>F NMR (376 MHz, CDCl<sub>3</sub>): δ = -63.4 (s, 3F), -71.6 (s, 3F). HRMS (ESI) *m/z*: [M+H]<sup>+</sup> calcd for C<sub>11</sub>H<sub>8</sub>F<sub>6</sub>NO<sup>+</sup>

284.0505, found 284.0503.

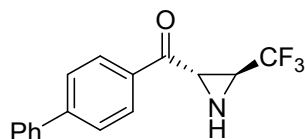

Compound **2j**: 45.3 mg, 78% yield, white solid, mp 97-99 °C. <sup>1</sup>H NMR (400 MHz, CDCl<sub>3</sub>): δ = 8.15-8.13 (m, 2H), 7.81-7.79 (m, 2H), 7.69-7.66 (m, 2H), 7.55-7.51 (m, 2H), 7.49-7.44 (m, 1H), 3.81-3.78 (m, 1H), 2.86-2.81 (m, 1H), 2.44 (t, *J* = 8.72 Hz, 1H). <sup>13</sup>C NMR (100 MHz, CDCl<sub>3</sub>): δ = 193.6, 147.4, 139.4, 133.7, 129.1, 128.7, 127.7, 127.3, 124.4, 121.7, 39.1 (q, *J* = 40.2 Hz), 34.6. <sup>19</sup>F NMR (376 MHz, CDCl<sub>3</sub>): δ = -71.4 (s, 3F). HRMS (ESI) *m/z*: [M+H]<sup>+</sup> calcd for C<sub>16</sub>H<sub>13</sub>F<sub>3</sub>NO<sup>+</sup> 292.0944, found 292.0934.

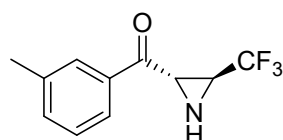

Compound **2k**: 36.5 mg, 80% yield, white solid, mp 65-68 °C. <sup>1</sup>H NMR (400 MHz, CDCl<sub>3</sub>): δ = 7.86-7.84 (m, 2H), 7.52-7.43 (m, 2H), 3.74-3.72 (m, 1H), 2.82-2.75 (m, 1H), 2.47 (s, 3H), 2.40 (t, *J* = 8.48 Hz, 1H). <sup>13</sup>C NMR (100 MHz, CDCl<sub>3</sub>): δ = 194.2, 139.1, 135.5, 135.1, 129.0, 128.9, 125.8, 124.4 (d, *J* = 271.4 Hz), 39.1 (q, *J* = 40.2 Hz), 34.6, 21.3. <sup>19</sup>F NMR (376 MHz, CDCl<sub>3</sub>): δ = -71.5 (s, 3F). HRMS (ESI) *m/z*: [M+H]<sup>+</sup> calcd for C<sub>11</sub>H<sub>11</sub>F<sub>3</sub>NO<sup>+</sup> 230.0787, found 230.0785.

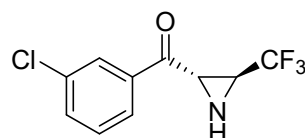

Compound **2l**: 30.9 mg, 62% yield, white solid, mp 81-84 °C. <sup>1</sup>H NMR (400 MHz, CDCl<sub>3</sub>): δ = 8.01 (t, *J* = 1.8 Hz, 1H), 7.95-7.92 (m, 1H), 7.69-7.66 (m, 1H), 7.55 (t, *J* = 7.92 Hz, 1H), 3.71-3.68 (m, 1H), 2.86-2.79 (m, 1H), 2.41 (t, *J* = 8.6 Hz, 1H). <sup>13</sup>C NMR (100 MHz, CDCl<sub>3</sub>): δ = 193.2, 136.5, 135.6, 134.6, 130.5, 128.5, 126.9 (d, *J* = 271.7 Hz), 126.6, 39.4 (q, *J* = 40.5 Hz), 34.6. <sup>19</sup>F NMR

(376 MHz, CDCl<sub>3</sub>):  $\delta = -71.5$  (s, 3F). HRMS (ESI)  $m/z$ : [M+H]<sup>+</sup> calcd for C<sub>10</sub>H<sub>8</sub>ClF<sub>3</sub>NO<sup>+</sup> 250.0241, found 250.0241.

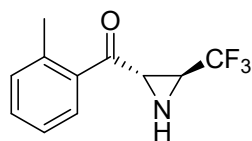

Compound **2m**: 32.5 mg, 71% yield, white solid, mp 56-59 °C. <sup>1</sup>H NMR (400 MHz, CDCl<sub>3</sub>):  $\delta = 7.86$  (d,  $J = 7.72$  Hz, 1H), 7.54 (t,  $J = 7.52$  Hz, 1H), 7.41-7.34 (m, 2H), 3.59 (d,  $J = 8.08$  Hz, 1H), 2.81-2.77 (m, 1H), 2.57 (s, 3H), 2.41 (t,  $J = 8.16$  Hz, 1H). <sup>13</sup>C NMR (100 MHz, CDCl<sub>3</sub>):  $\delta = 196.6$ , 139.5, 134.9, 133.1, 132.4, 129.6, 126.2, 124.4 (d,  $J = 271.6$  Hz), 39.2 (q,  $J = 40.2$  Hz), 36.7, 21.3. <sup>19</sup>F NMR (376 MHz, CDCl<sub>3</sub>):  $\delta = -71.4$  (s, 3F). HRMS (ESI)  $m/z$ : [M+H]<sup>+</sup> calcd for C<sub>11</sub>H<sub>11</sub>F<sub>3</sub>NO<sup>+</sup> 230.0787, found 230.0786.

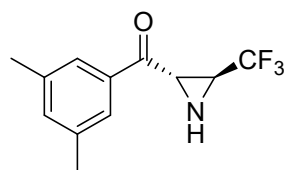

Compound **2n**: 38.3 mg, 79% yield, white solid, mp 45-47 °C. <sup>1</sup>H NMR (400 MHz, CDCl<sub>3</sub>):  $\delta = 7.65$  (s, 2H), 7.33 (s, 1H), 3.73 (d,  $J = 8.00$  Hz, 1H), 2.77 (s, 1H), 2.43 (s, 6H), 2.38 (t,  $J = 8.64$  Hz, 1H). <sup>13</sup>C NMR (100 MHz, CDCl<sub>3</sub>):  $\delta = 194.4$ , 138.9, 136.3, 135.2, 126.2, 124.4 (d,  $J = 271.6$  Hz), 39.0 (q,  $J = 40.3$  Hz), 34.6, 21.2. <sup>19</sup>F NMR (376 MHz, CDCl<sub>3</sub>):  $\delta = -71.5$  (s, 3F). HRMS (ESI)  $m/z$ : [M+H]<sup>+</sup> calcd for C<sub>12</sub>H<sub>13</sub>F<sub>3</sub>NO<sup>+</sup> 244.0944, found 244.0942.

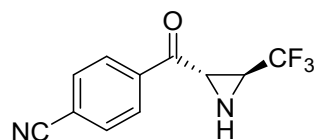

Compound **2o**: 22.6 mg, 47% yield, white solid, mp 110-113 °C. <sup>1</sup>H NMR (400 MHz, CDCl<sub>3</sub>):  $\delta = 8.16$  (d,  $J = 7.96$  Hz, 2H), 7.90 (d,  $J = 8.00$  Hz, 2H), 3.73 (d,  $J = 7.96$  Hz, 1H), 2.86 (s, 1H), 2.45 (t,  $J = 8.48$  Hz, 1H). <sup>13</sup>C NMR (100 MHz, CDCl<sub>3</sub>):  $\delta = 193.3$ , 137.9, 132.9, 128.9, 124.1 (d,  $J = 271.8$

Hz), 117.9, 117.5, 39.7 (q,  $J = 40.4$  Hz), 34.8.  $^{19}\text{F}$  NMR (376 MHz,  $\text{CDCl}_3$ ):  $\delta = -71.5$  (s, 3F). HRMS

(ESI)  $m/z$ :  $[\text{M}+\text{H}]^+$  calcd for  $\text{C}_{11}\text{H}_8\text{F}_3\text{N}_2\text{O}^+$  241.0583, found 241.0575.

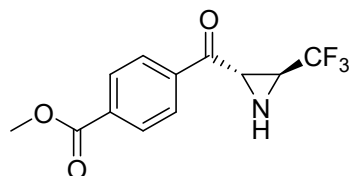

Compound **2p**: 36.4 mg, 67% yield, white solid, mp 88-90 °C.  $^1\text{H}$  NMR (400 MHz,  $\text{CDCl}_3$ ):  $\delta =$

8.23 (d,  $J = 8.36$  Hz, 2H), 8.11 (d,  $J = 8.48$  Hz, 2H), 3.99 (s, 3H), 3.76-3.74 (m, 1H), 2.88-2.81 (m,

1H), 2.43 (t,  $J = 8.72$  Hz, 1H).  $^{13}\text{C}$  NMR (100 MHz,  $\text{CDCl}_3$ ):  $\delta = 193.9, 165.8, 138.1, 135.3, 130.2,$

128.4, 124.2 (d,  $J = 271.7$  Hz), 52.7, 39.4 (q,  $J = 40.5$  Hz), 34.8.  $^{19}\text{F}$  NMR (376 MHz,  $\text{CDCl}_3$ ):  $\delta =$

-71.5 (s, 3F). HRMS (ESI)  $m/z$ :  $[\text{M}+\text{H}]^+$  calcd for  $\text{C}_{12}\text{H}_{11}\text{F}_3\text{NO}_3^+$  274.0686, found 274.0679.

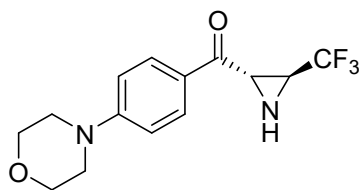

Compound **2q**: 55.8 mg, 93% yield, white solid, mp 138-141 °C.  $^1\text{H}$  NMR (400 MHz,  $\text{CDCl}_3$ ):  $\delta =$

8.00-7.96 (m, 2H), 6.95-6.91 (m, 2H), 3.90-3.87 (m, 4H), 3.69-3.66 (m, 1H), 3.41-3.38 (m, 4H),

2.78-2.71 (m, 1H), 2.36 (t,  $J = 8.72$  Hz, 1H).  $^{13}\text{C}$  NMR (100 MHz,  $\text{CDCl}_3$ ):  $\delta = 191.2, 155.1, 130.8,$

127.3 (t,  $J = 271.4$  Hz), 125.4, 113.2, 66.4, 47.1, 38.6 (q,  $J = 40.3$  Hz), 34.0.  $^{19}\text{F}$  NMR (376 MHz,

$\text{CDCl}_3$ ):  $\delta = -71.4$  (s, 3F). HRMS (ESI)  $m/z$ :  $[\text{M}+\text{H}]^+$  calcd for  $\text{C}_{14}\text{H}_{16}\text{F}_3\text{N}_2\text{O}_2^+$  301.1158, found

301.1156.

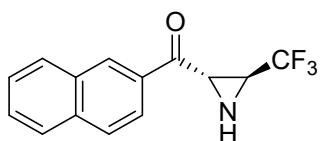

Compound **2r**: 38.9 mg, 73% yield, white solid, mp 80-83 °C.  $^1\text{H}$  NMR (400 MHz,  $\text{CDCl}_3$ ):  $\delta =$

8.58 (s, 1H), 8.07-8.03 (m, 2H), 7.98-7.92 (m, 2H), 7.71-7.61 (m, 2H), 3.91-3.89 (m, 1H), 2.91-2.84 (m, 1H), 2.48 (t,  $J = 8.20$  Hz, 1H).  $^{13}\text{C}$  NMR (100 MHz,  $\text{CDCl}_3$ ):  $\delta = 193.9, 136.2, 132.5, 132.4, 130.9, 129.9, 129.4, 129.1, 127.9, 127.3, 124.5$  (d,  $J = 271.8$  Hz), 123.4, 39.2 (q,  $J = 40.3$  Hz), 34.6.  $^{19}\text{F}$  NMR (376 MHz,  $\text{CDCl}_3$ ):  $\delta = -71.3$  (s, 3F). HRMS (ESI)  $m/z$ :  $[\text{M}+\text{H}]^+$  calcd for  $\text{C}_{14}\text{H}_{11}\text{F}_3\text{NO}^+$  266.0787, found 266.0777.

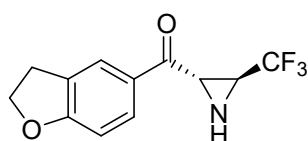

Compound **2s**: 47.1 mg, 92% yield, white solid, mp 81-84 °C.  $^1\text{H}$  NMR (400 MHz,  $\text{CDCl}_3$ ):  $\delta = 7.91$  (s, 2H), 6.91 (d,  $J = 8.56$  Hz, 1H), 4.74 (t,  $J = 8.68$  Hz, 2H), 3.67 (d,  $J = 7.96$  Hz, 1H), 3.33 (t,  $J = 8.72$  Hz, 2H), 2.74 (s, 1H), 2.37 (t,  $J = 8.48$  Hz, 1H).  $^{13}\text{C}$  NMR (100 MHz,  $\text{CDCl}_3$ ):  $\delta = 191.8, 165.8, 130.8, 128.5, 128.4, 127.2$  (q,  $J = 271.6$  Hz), 125.8, 109.7, 72.5, 38.7 (q,  $J = 40.2$  Hz), 34.2, 28.8.  $^{19}\text{F}$  NMR (376 MHz,  $\text{CDCl}_3$ ):  $\delta = -71.4$  (s, 3F). HRMS (ESI)  $m/z$ :  $[\text{M}+\text{H}]^+$  calcd for  $\text{C}_{12}\text{H}_{11}\text{F}_3\text{NO}_2^+$  258.0736, found 258.0735.

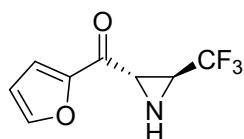

Compound **2t**: 27.7 mg, 67% yield, white solid, mp 87-89 °C.  $^1\text{H}$  NMR (400 MHz,  $\text{CDCl}_3$ ):  $\delta = 7.77$  (s, 1H), 7.45 (s, 1H), 6.69 (s, 1H), 3.68 (d,  $J = 7.92$  Hz, 1H), 2.86 (s, 1H), 2.23 (s, 1H).  $^{13}\text{C}$  NMR (100 MHz,  $\text{CDCl}_3$ ):  $\delta = 182.4, 151.5, 148.3, 124.2$  (d,  $J = 271.7$  Hz), 119.7, 113.1, 38.9 (q,  $J = 40.4$  Hz), 34.4.  $^{19}\text{F}$  NMR (376 MHz,  $\text{CDCl}_3$ ):  $\delta = -71.6$  (s, 3F). HRMS (ESI)  $m/z$ :  $[\text{M}+\text{H}]^+$  calcd for  $\text{C}_8\text{H}_7\text{F}_3\text{NO}_2^+$  206.0423, found 206.0422.

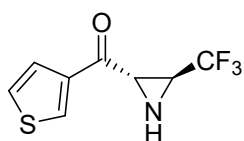



Compound **2u**: 30.6 mg, 69% yield, white solid, mp 85-89 °C. <sup>1</sup>H NMR (400 MHz, CDCl<sub>3</sub>): δ = 8.31 (s, 1H), 7.65-7.64 (m, 1H), 7.45 (s, 1H), 3.60 (d, *J* = 7.92 Hz, 1H), 2.82 (s, 1H), 2.30 (s, 1H). <sup>13</sup>C NMR (100 MHz, CDCl<sub>3</sub>): δ = 187.9, 140.2, 134.2, 127.5, 126.6, 124.3 (d, *J* = 271.7 Hz), 38.9 (q, *J* = 40.4 Hz), 35.4. <sup>19</sup>F NMR (376 MHz, CDCl<sub>3</sub>): δ = -71.5 (s, 3F). HRMS (ESI) *m/z*: [M+H]<sup>+</sup> calcd for C<sub>8</sub>H<sub>7</sub>F<sub>3</sub>NOS<sup>+</sup> 222.0195, found 222.0194.

## 9. Computational details

DFT calculations were carried out with the Gaussian 16 software package. Geometry optimization calculations were performed with the B3LYP functional including the Empirical Dispersion D3. The optimized geometries were confirmed to be minima (no imaginary frequencies) by frequency calculations.

### *trans-2a*

|                                              |              |             |                             |
|----------------------------------------------|--------------|-------------|-----------------------------|
| Zero-point correction=                       |              |             | 0.166416 (Hartree/Particle) |
| Thermal correction to Energy=                |              |             | 0.178886                    |
| Thermal correction to Enthalpy=              |              |             | 0.179830                    |
| Thermal correction to Gibbs Free Energy=     |              |             | 0.125642                    |
| Sum of electronic and zero-point Energies=   |              |             | -815.421269                 |
| Sum of electronic and thermal Energies=      |              |             | -815.408799                 |
| Sum of electronic and thermal Enthalpies=    |              |             | -815.407855                 |
| Sum of electronic and thermal Free Energies= |              |             | -815.462043                 |
| 6                                            | -1.951700000 | 3.893729000 | 3.250105000                 |
| 6                                            | -1.579046000 | 5.124187000 | 2.715315000                 |
| 6                                            | -1.173337000 | 5.220739000 | 1.386034000                 |
| 6                                            | -1.144463000 | 4.075567000 | 0.575990000                 |
| 6                                            | -1.536163000 | 2.842105000 | 1.121164000                 |
| 6                                            | -1.929947000 | 2.750791000 | 2.448501000                 |
| 1                                            | -2.262190000 | 3.823640000 | 4.286687000                 |
| 1                                            | -1.607413000 | 6.015271000 | 3.331997000                 |
| 1                                            | -0.905977000 | 6.180846000 | 0.967314000                 |
| 1                                            | -1.522938000 | 1.968785000 | 0.481318000                 |
| 1                                            | -2.222627000 | 1.791915000 | 2.860725000                 |
| 6                                            | -0.737625000 | 4.074450000 | -0.864353000                |
| 6                                            | 0.070899000  | 5.187485000 | -1.494253000                |
| 6                                            | 1.249532000  | 5.802869000 | -0.816130000                |
| 1                                            | 1.477858000  | 5.543659000 | 0.212473000                 |
| 6                                            | 2.479678000  | 6.095658000 | -1.627654000                |
| 9                                            | 3.209486000  | 7.079694000 | -1.061794000                |
| 9                                            | 2.166831000  | 6.501398000 | -2.882297000                |
| 9                                            | 3.270085000  | 5.012417000 | -1.730212000                |
| 7                                            | 0.038413000  | 6.584121000 | -1.014753000                |
| 8                                            | -0.982612000 | 3.123930000 | -1.584023000                |
| 1                                            | 0.166231000  | 5.028145000 | -2.563466000                |
| 1                                            | 0.140000000  | 7.211751000 | -1.809084000                |

*cis-2a*

|                                              |              |             |                             |
|----------------------------------------------|--------------|-------------|-----------------------------|
| Zero-point correction=                       |              |             | 0.166079 (Hartree/Particle) |
| Thermal correction to Energy=                |              |             | 0.178587                    |
| Thermal correction to Enthalpy=              |              |             | 0.179531                    |
| Thermal correction to Gibbs Free Energy=     |              |             | 0.124967                    |
| Sum of electronic and zero-point Energies=   |              |             | -815.416885                 |
| Sum of electronic and thermal Energies=      |              |             | -815.404378                 |
| Sum of electronic and thermal Enthalpies=    |              |             | -815.403433                 |
| Sum of electronic and thermal Free Energies= |              |             | -815.457997                 |
| 6                                            | -3.920802000 | 3.582601000 | -2.103602000                |
| 6                                            | -3.415217000 | 4.712983000 | -1.466232000                |
| 6                                            | -2.061845000 | 4.796793000 | -1.150099000                |
| 6                                            | -1.200068000 | 3.738489000 | -1.470997000                |
| 6                                            | -1.718619000 | 2.604196000 | -2.116952000                |
| 6                                            | -3.067638000 | 2.526681000 | -2.430440000                |
| 1                                            | -4.975466000 | 3.523756000 | -2.349100000                |
| 1                                            | -4.074932000 | 5.536836000 | -1.218783000                |
| 1                                            | -1.665589000 | 5.683831000 | -0.679602000                |
| 1                                            | -1.040984000 | 1.795755000 | -2.360783000                |
| 1                                            | -3.457650000 | 1.646586000 | -2.928869000                |
| 6                                            | 0.256637000  | 3.721612000 | -1.154038000                |
| 6                                            | 0.970076000  | 4.814085000 | -0.364063000                |
| 6                                            | 1.642194000  | 5.990467000 | -0.988275000                |
| 1                                            | 2.620864000  | 6.270531000 | -0.609929000                |
| 6                                            | 1.499761000  | 6.348136000 | -2.443107000                |
| 9                                            | 1.592617000  | 7.685333000 | -2.613269000                |
| 9                                            | 0.328682000  | 5.951171000 | -2.968573000                |
| 9                                            | 2.490732000  | 5.780944000 | -3.161258000                |
| 7                                            | 0.460730000  | 6.174031000 | -0.157345000                |
| 1                                            | 0.703838000  | 6.531235000 | 0.761323000                 |
| 8                                            | 0.965513000  | 2.781140000 | -1.458983000                |
| 1                                            | 1.549963000  | 4.356337000 | 0.433981000                 |

## 10. $^1\text{H}$ , $^{13}\text{C}$ , $^{19}\text{F}$ and $^{31}\text{P}$ NMR spectra

$^1\text{H}$  NMR (400 MHz,  $\text{CDCl}_3$ ) of **2a**:

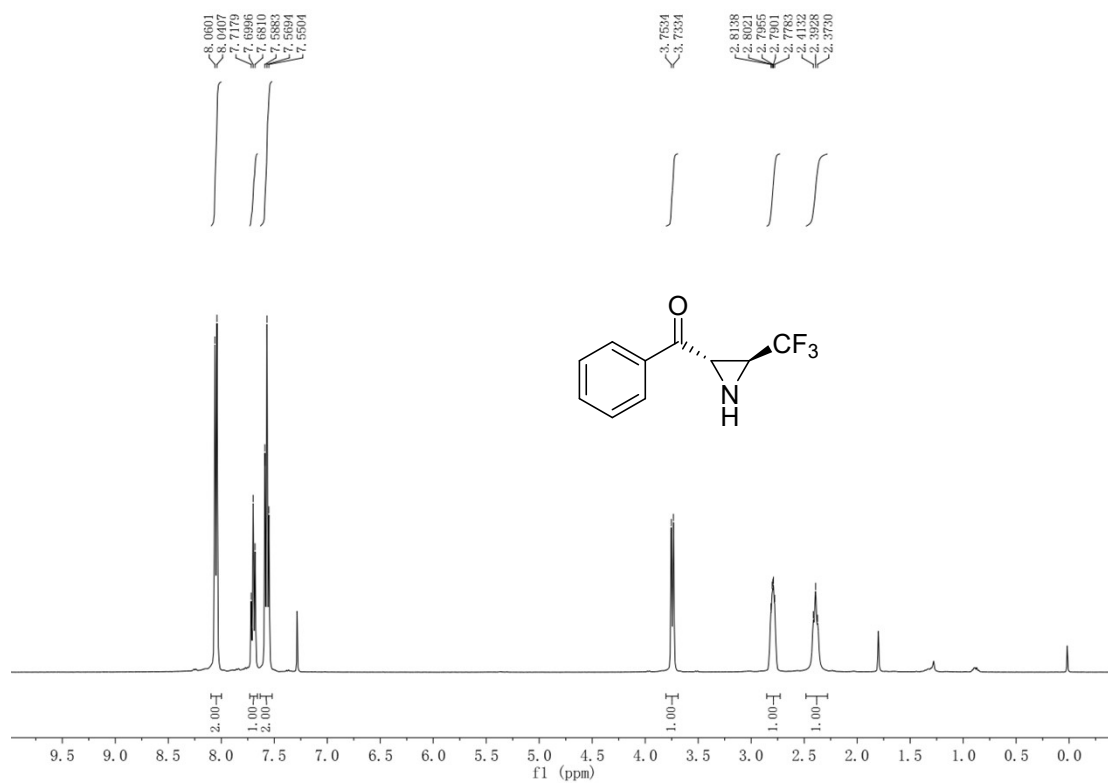

$^{13}\text{C}$  NMR (100 MHz,  $\text{CDCl}_3$ ) of **2a**:

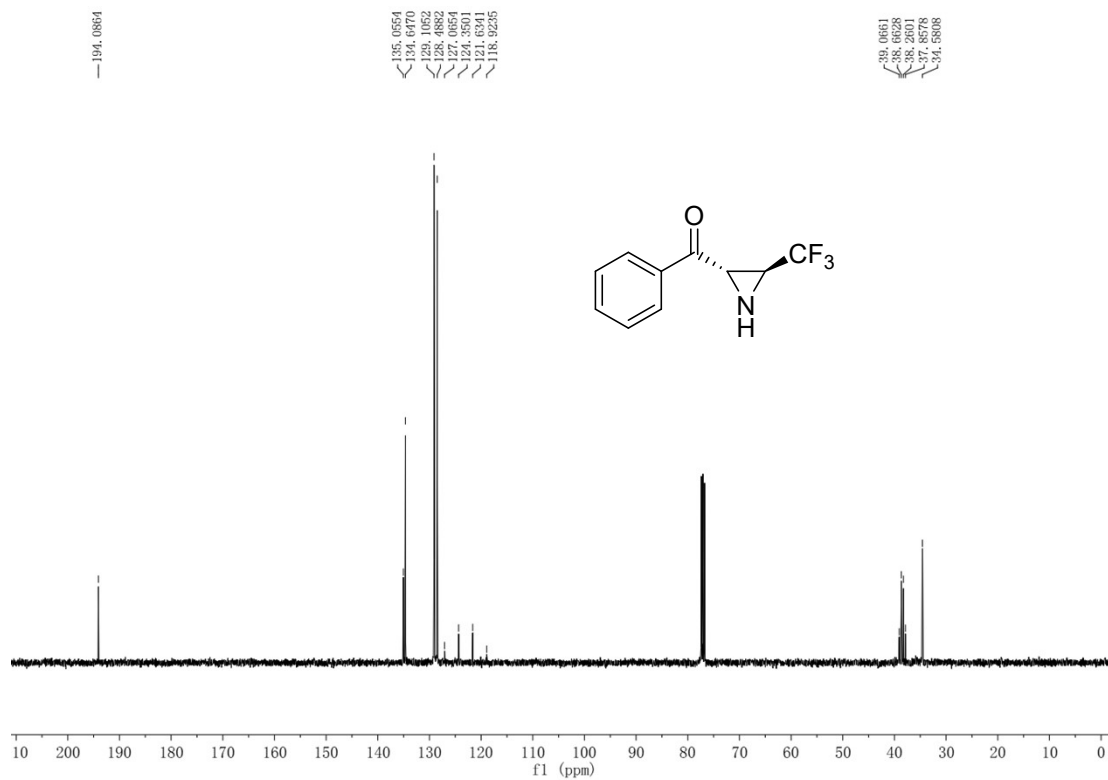

$^{19}\text{F}$  NMR (376 MHz,  $\text{CDCl}_3$ ) of **2a**:

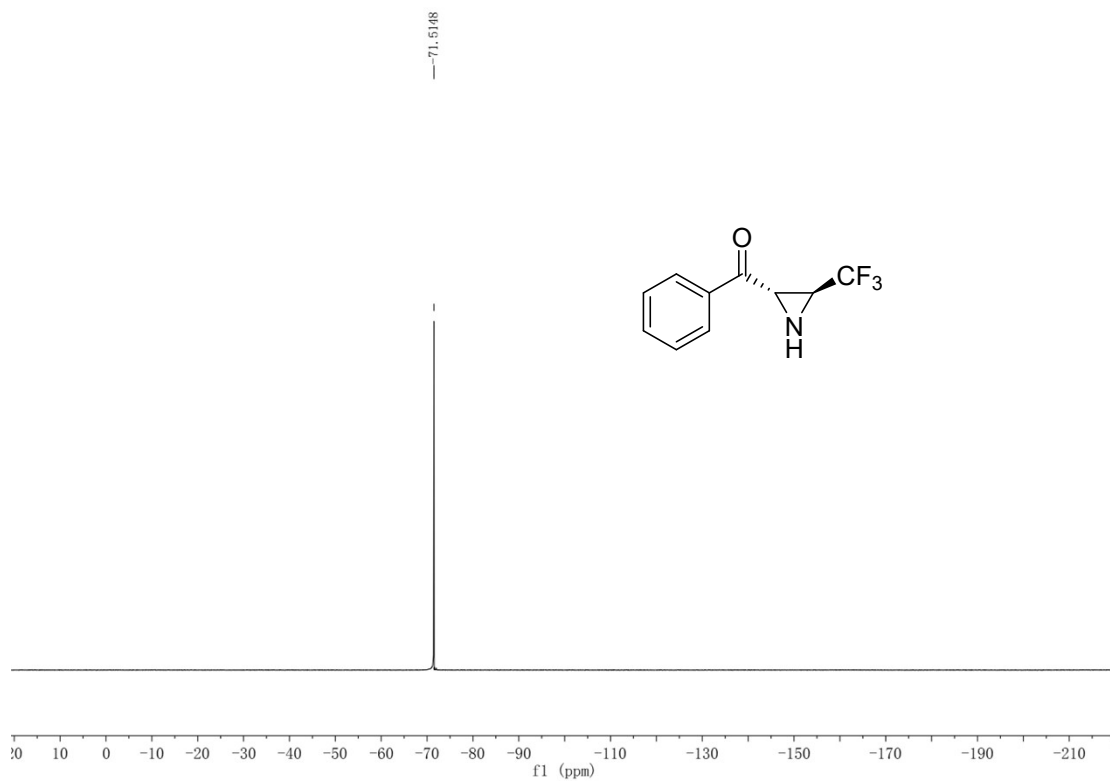

$^1\text{H}$  NMR (400 MHz,  $\text{CDCl}_3$ ) of **2b**:

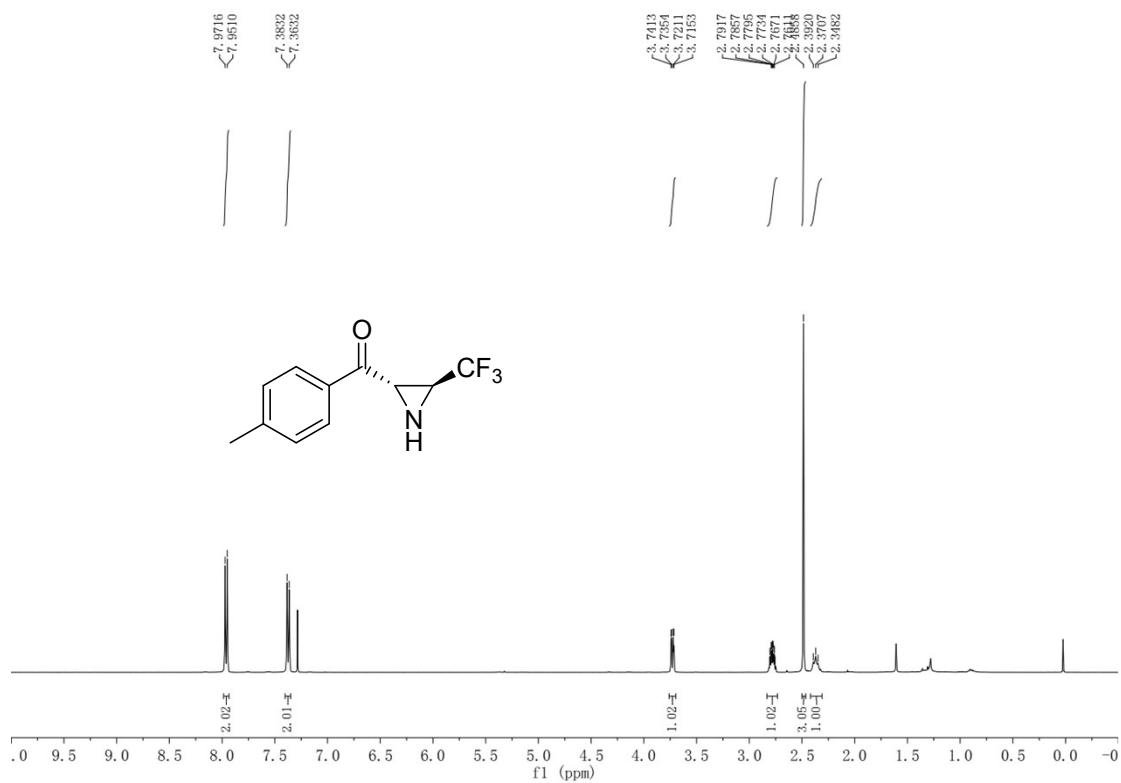

$^{13}\text{C}$  NMR (100 MHz,  $\text{CDCl}_3$ ) of **2b**:

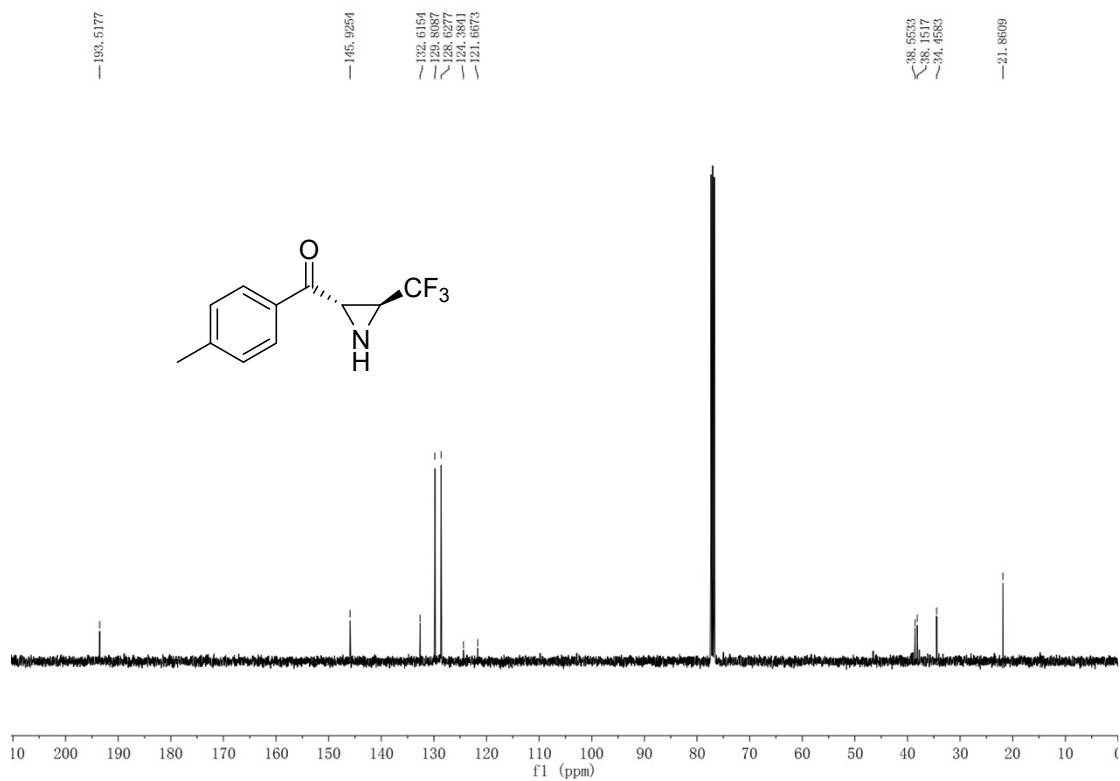

$^{19}\text{F}$  NMR (376 MHz,  $\text{CDCl}_3$ ) of **2b**:

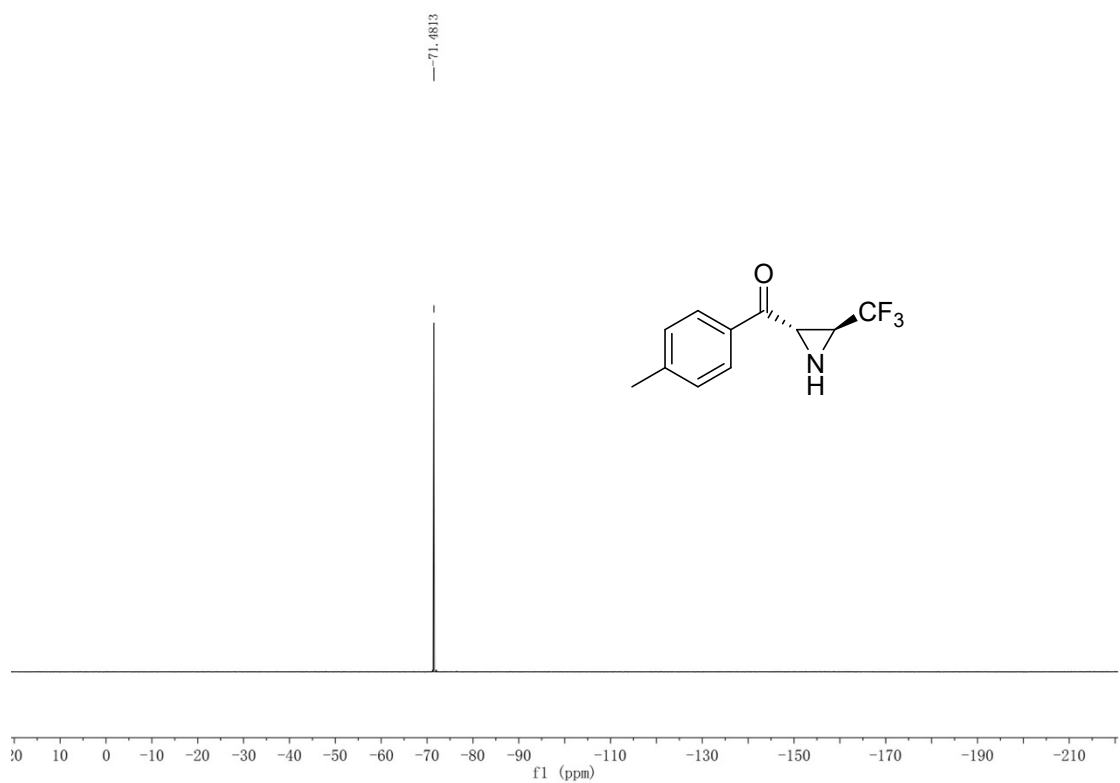

$^1\text{H}$  NMR (400 MHz,  $\text{CDCl}_3$ ) of **2c**:

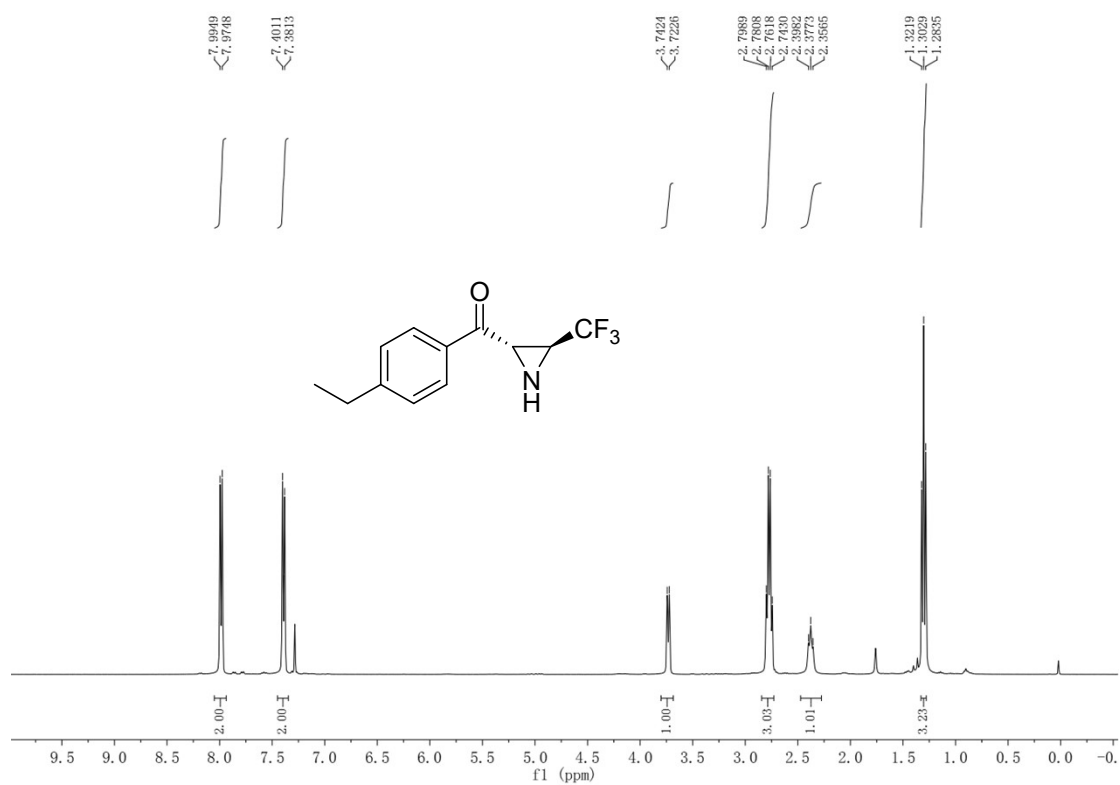

$^{13}\text{C}$  NMR (100 MHz,  $\text{CDCl}_3$ ) of **2c**:

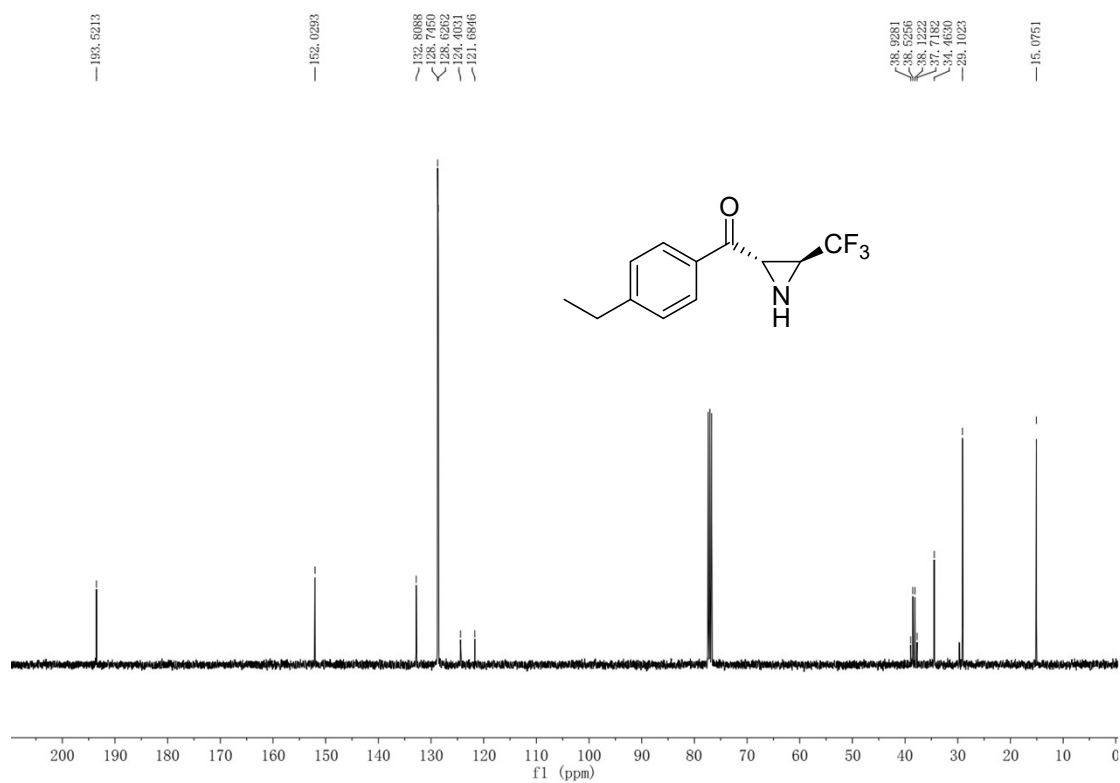

$^{19}\text{F}$  NMR (376 MHz,  $\text{CDCl}_3$ ) of **2c**:

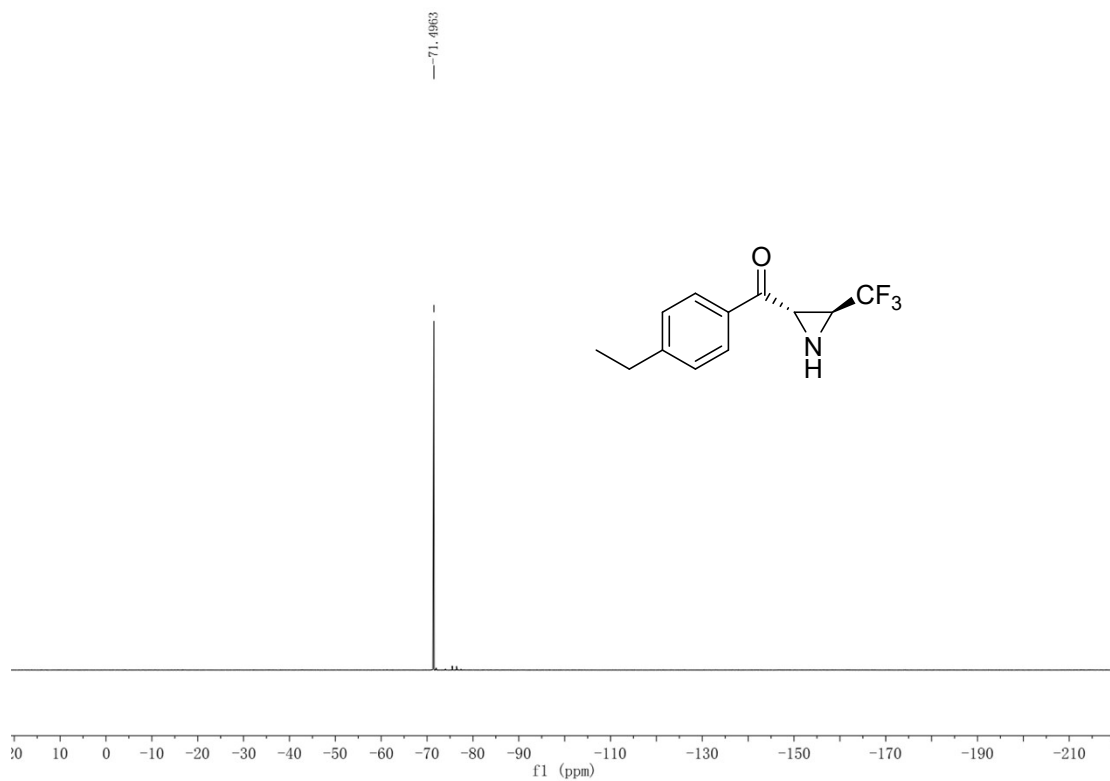

$^1\text{H}$  NMR (400 MHz,  $\text{CDCl}_3$ ) of **2d**:

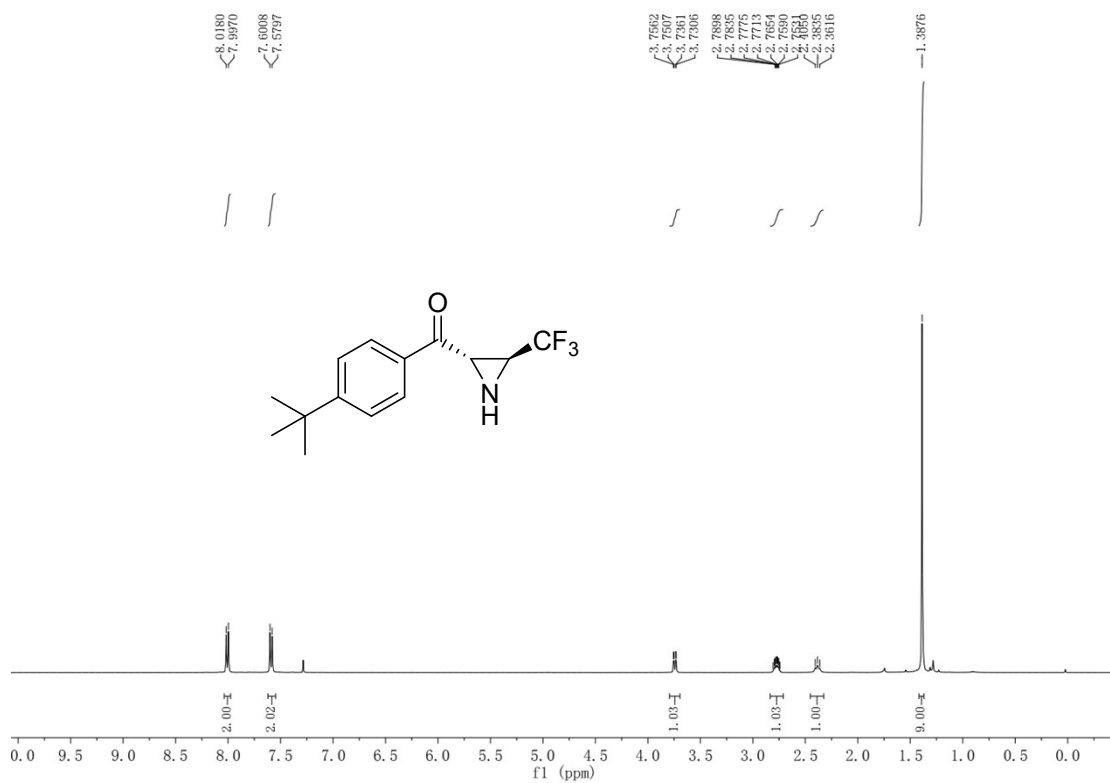



<sup>13</sup>C NMR (100 MHz, CDCl<sub>3</sub>) of **2d**:

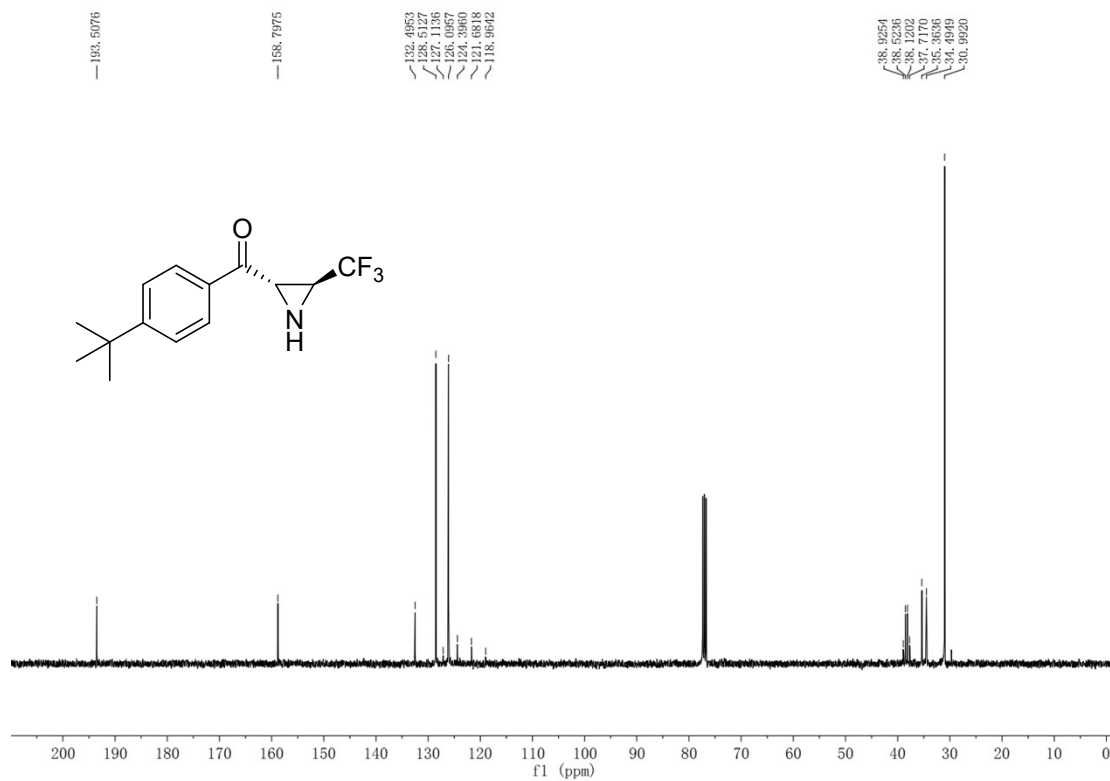

<sup>19</sup>F NMR (376 MHz, CDCl<sub>3</sub>) of **2d**:

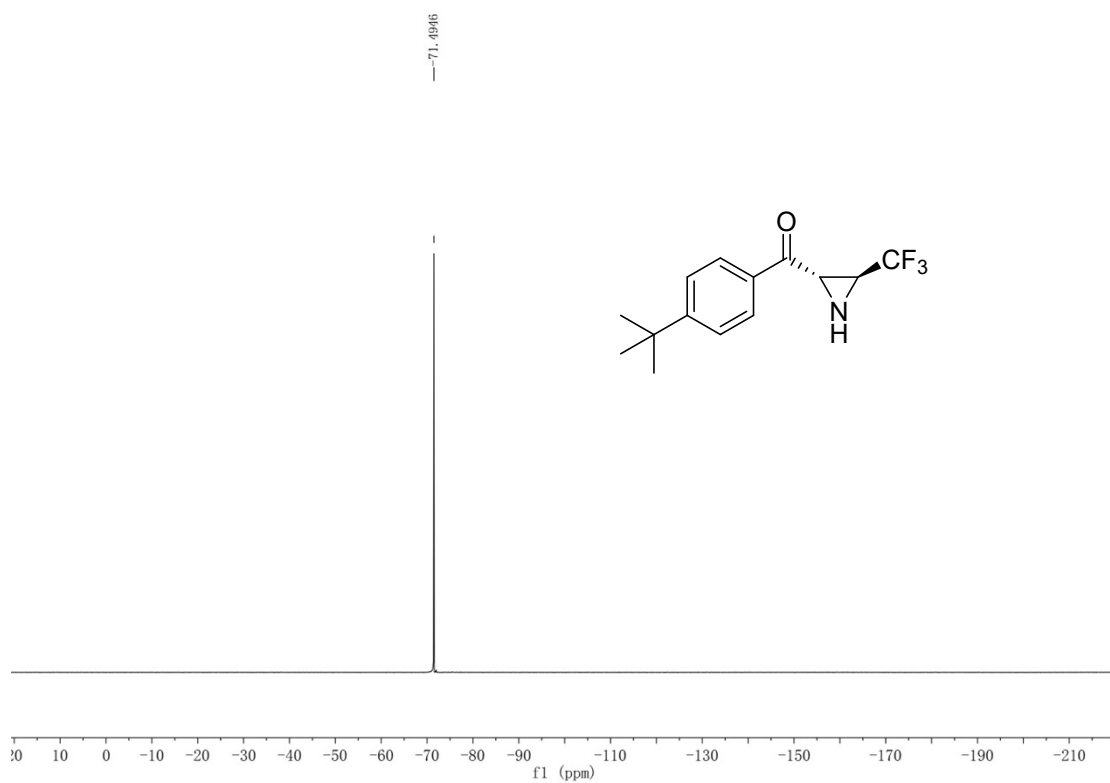

$^1\text{H}$  NMR (400 MHz,  $\text{CDCl}_3$ ) of **2e**:

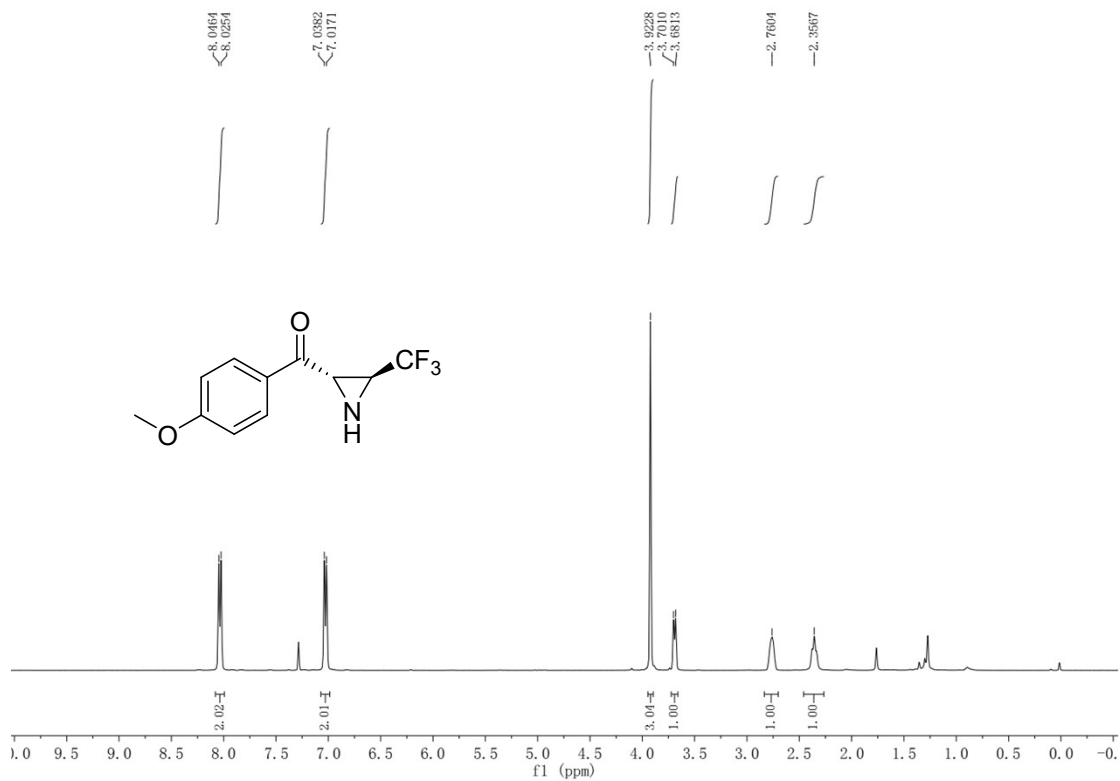

$^{13}\text{C}$  NMR (100 MHz,  $\text{CDCl}_3$ ) of **2e**:

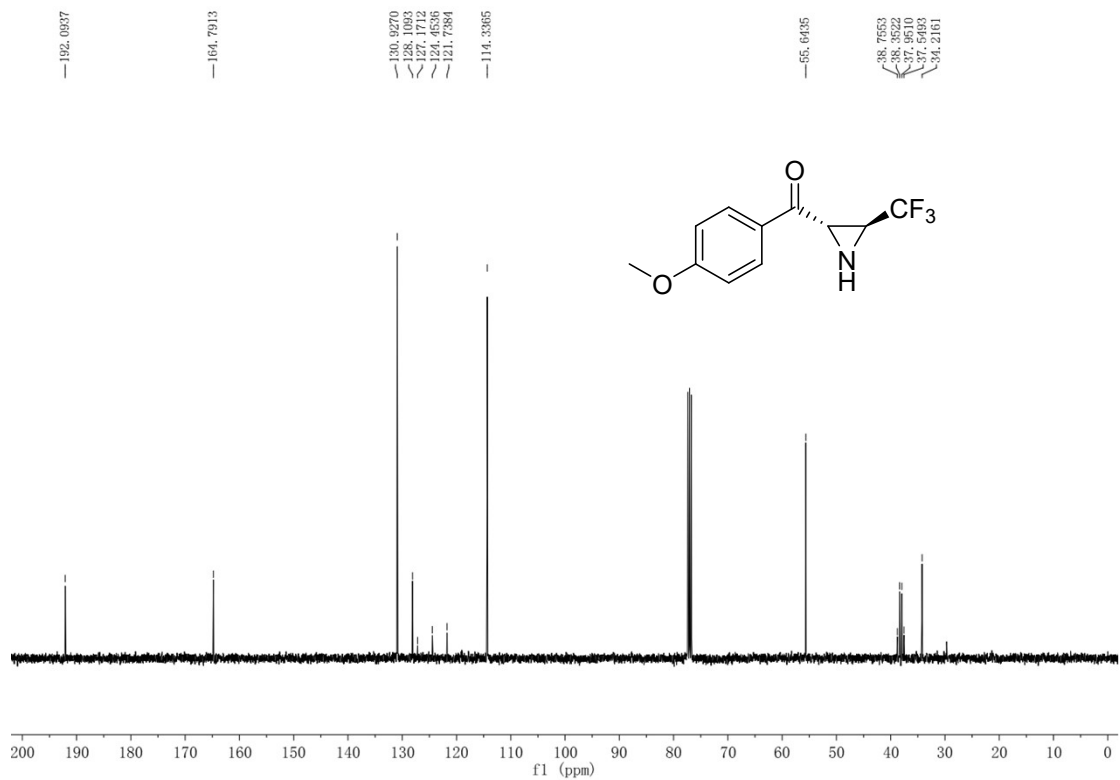

$^{19}\text{F}$  NMR (376 MHz,  $\text{CDCl}_3$ ) of **2e**:

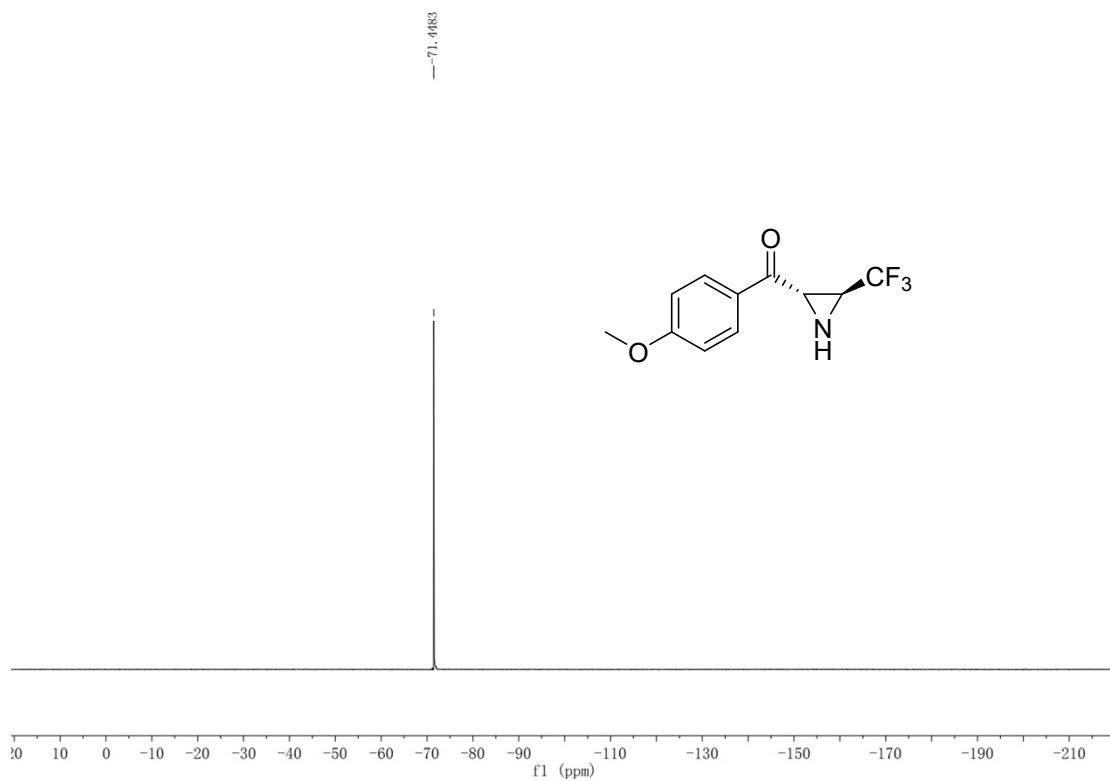

$^1\text{H}$  NMR (400 MHz,  $\text{CDCl}_3$ ) of **2f**:

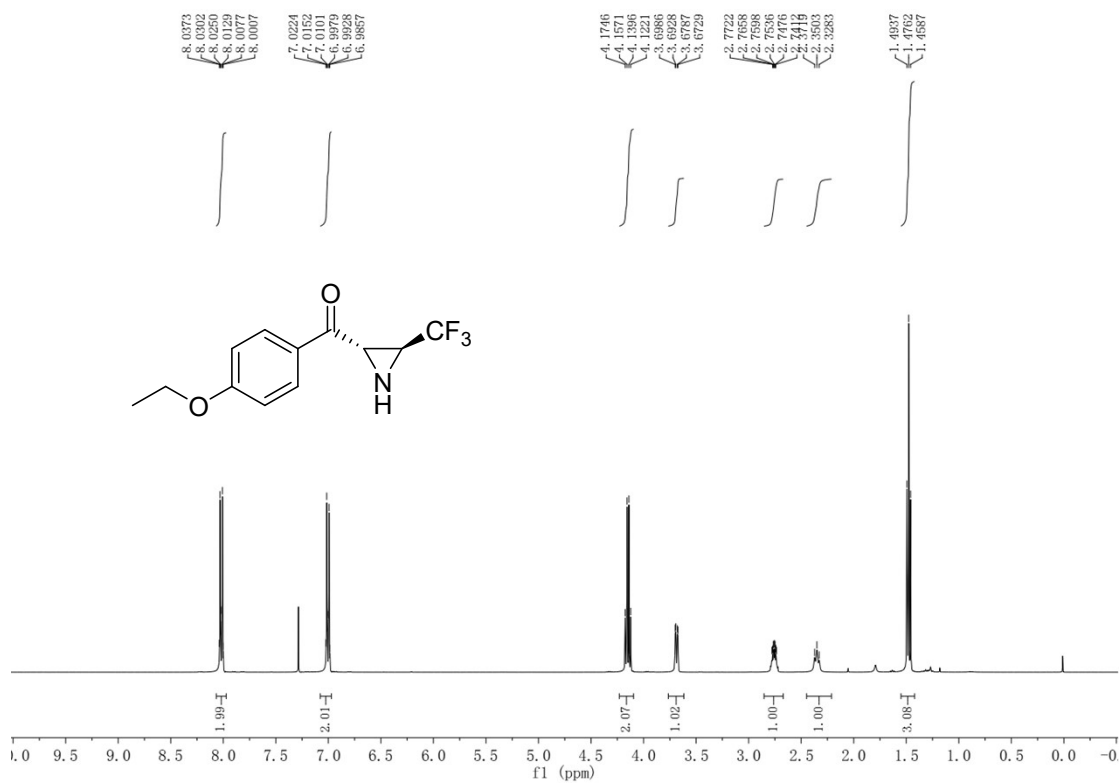

<sup>13</sup>C NMR (100 MHz, CDCl<sub>3</sub>) of **2f**:

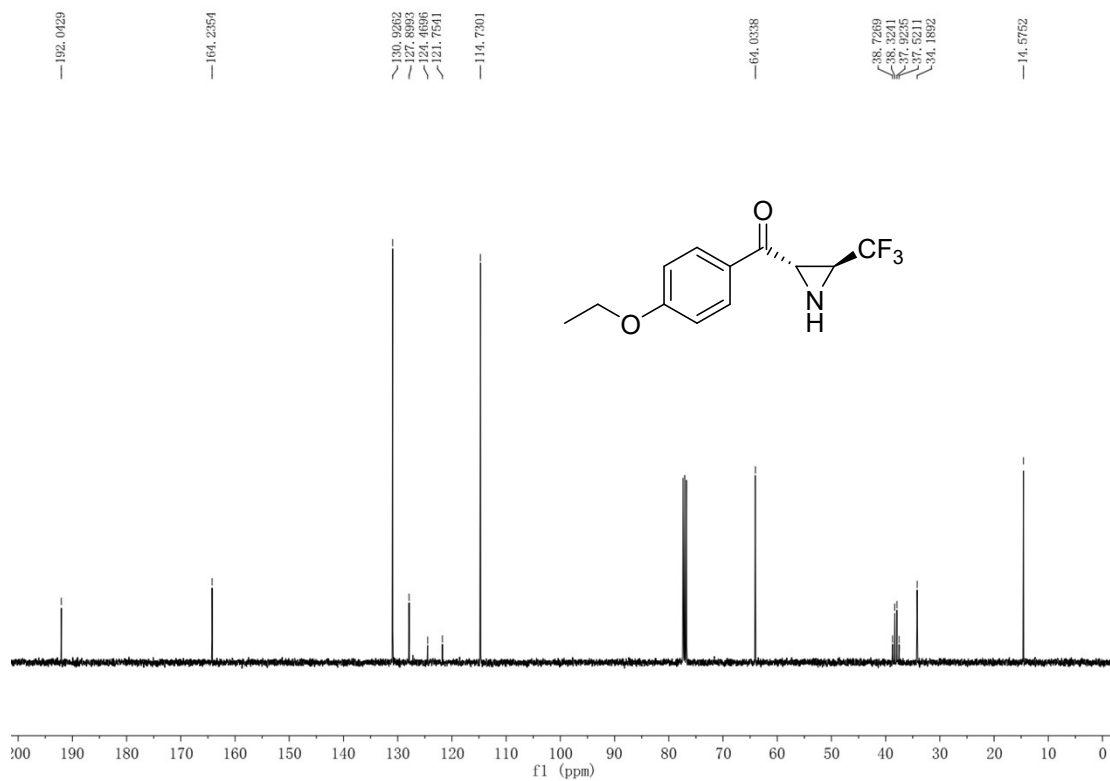

<sup>19</sup>F NMR (376 MHz, CDCl<sub>3</sub>) of **2f**:

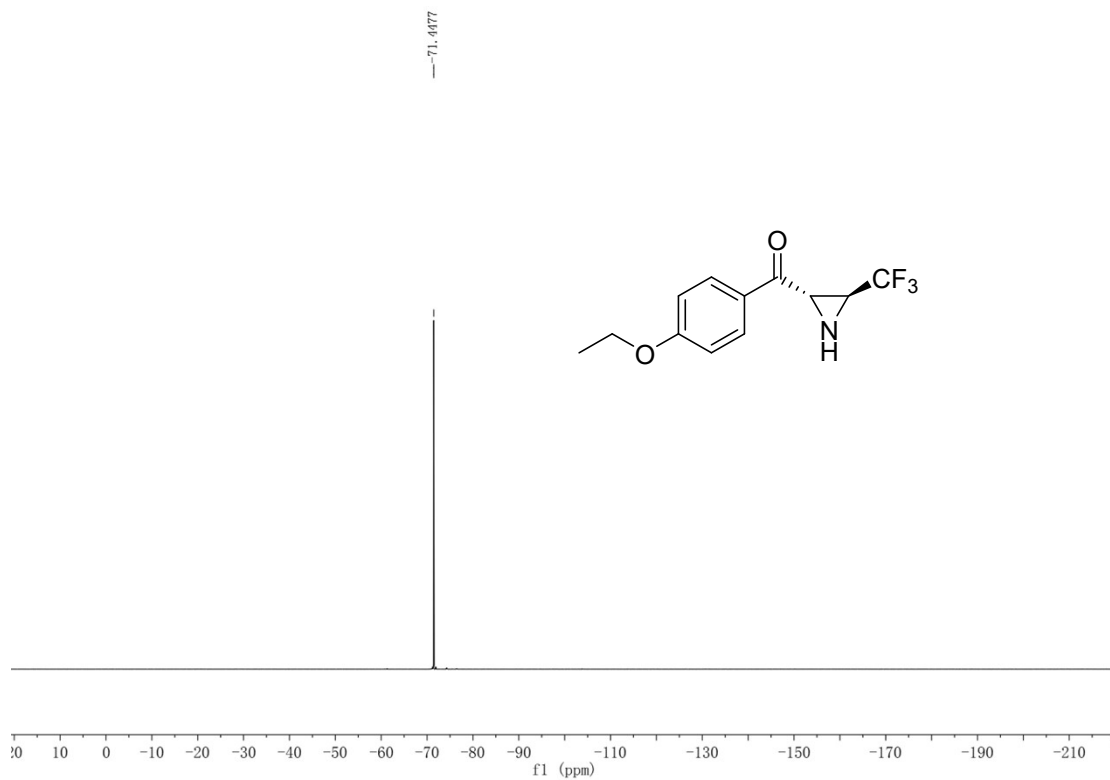

$^1\text{H}$  NMR (400 MHz,  $\text{CDCl}_3$ ) of **2g**:

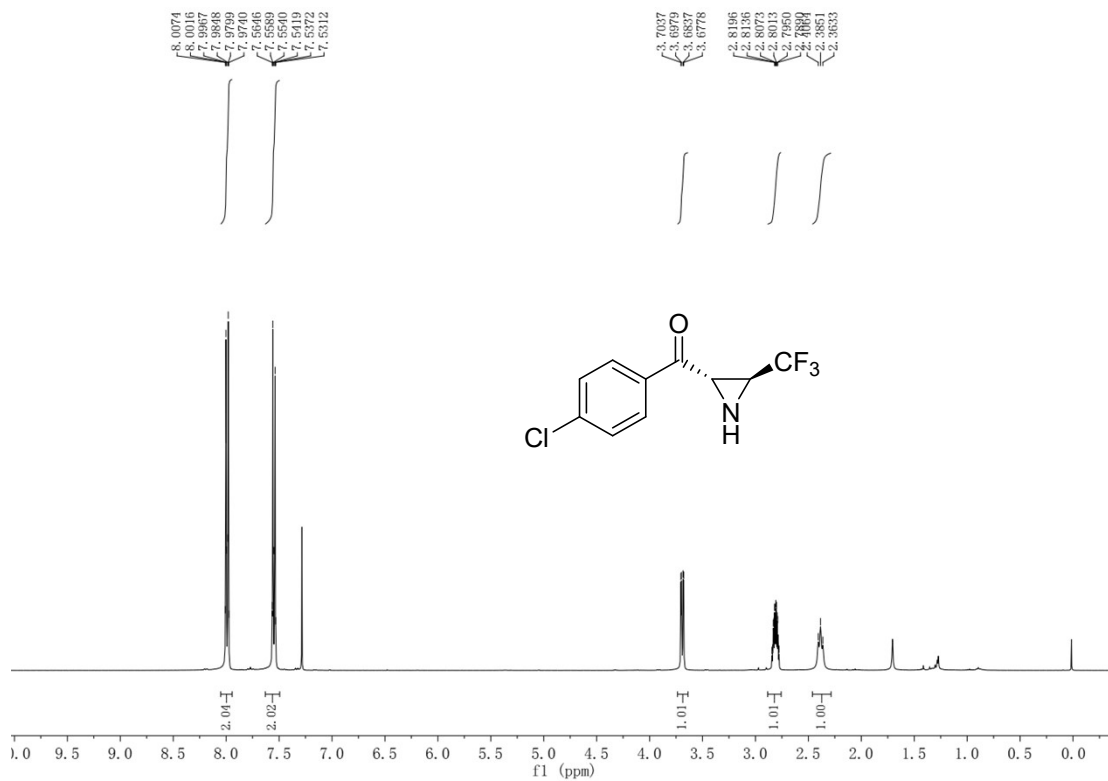

$^{13}\text{C}$  NMR (100 MHz,  $\text{CDCl}_3$ ) of **2g**:

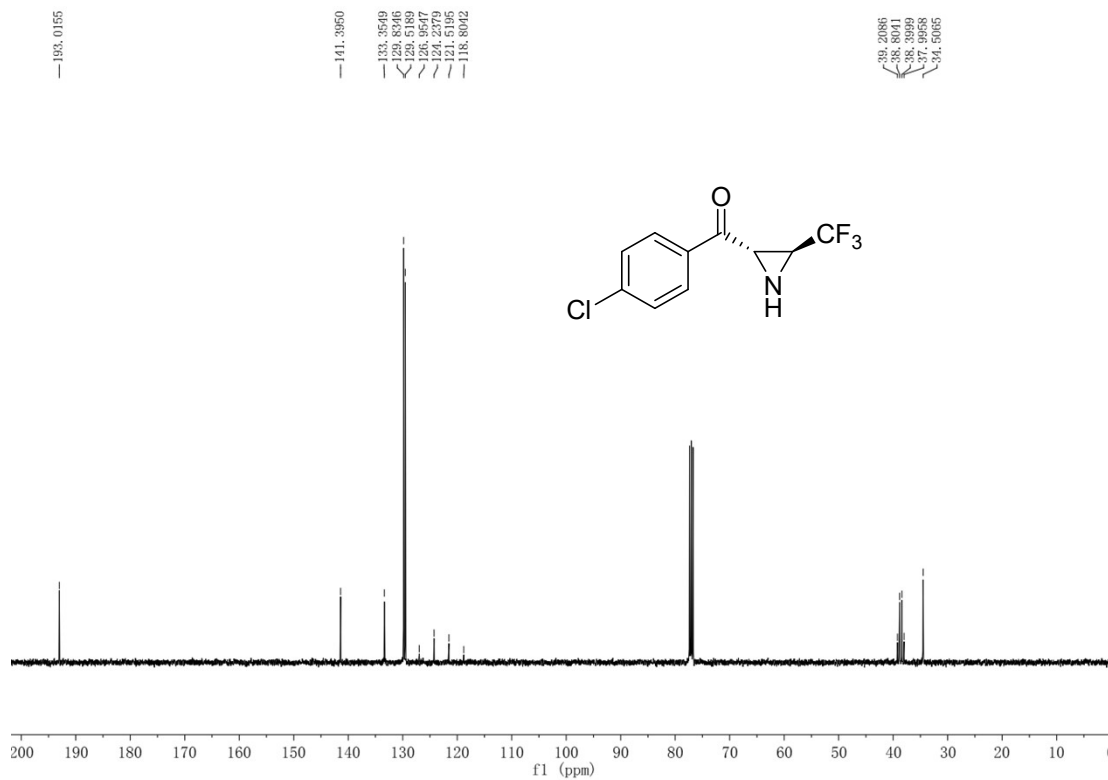

$^{19}\text{F}$  NMR (376 MHz,  $\text{CDCl}_3$ ) of **2g**:

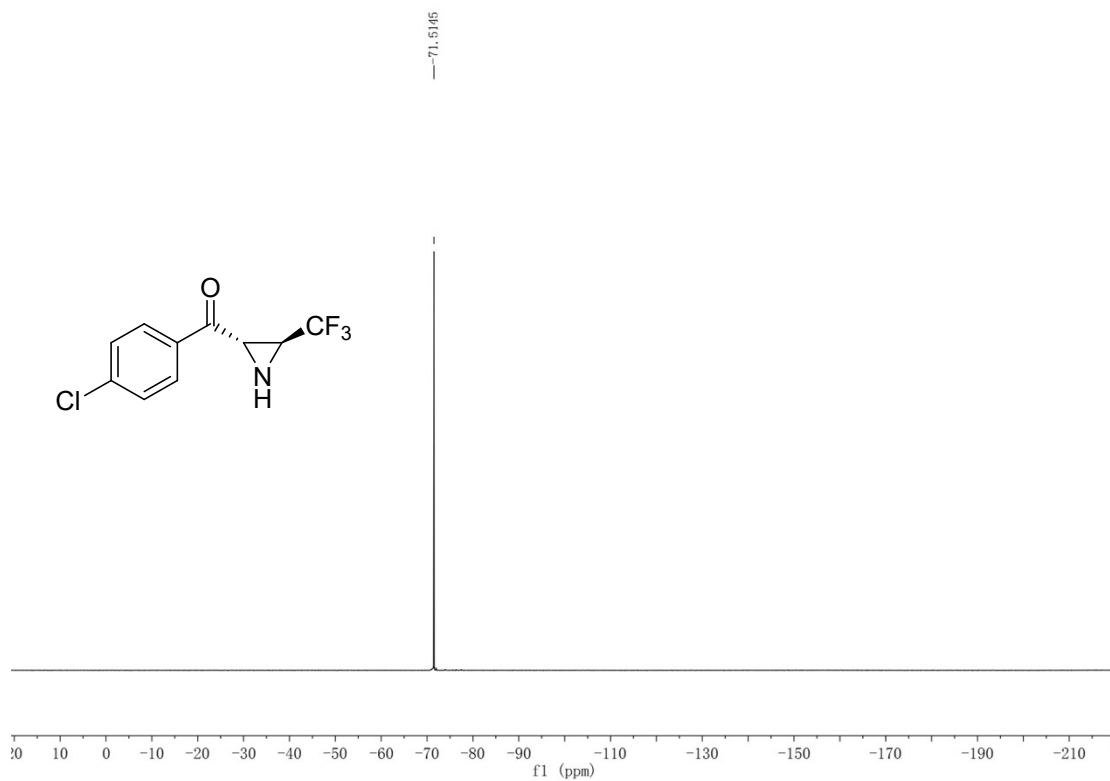

$^1\text{H}$  NMR (400 MHz,  $\text{CDCl}_3$ ) of **2h**:

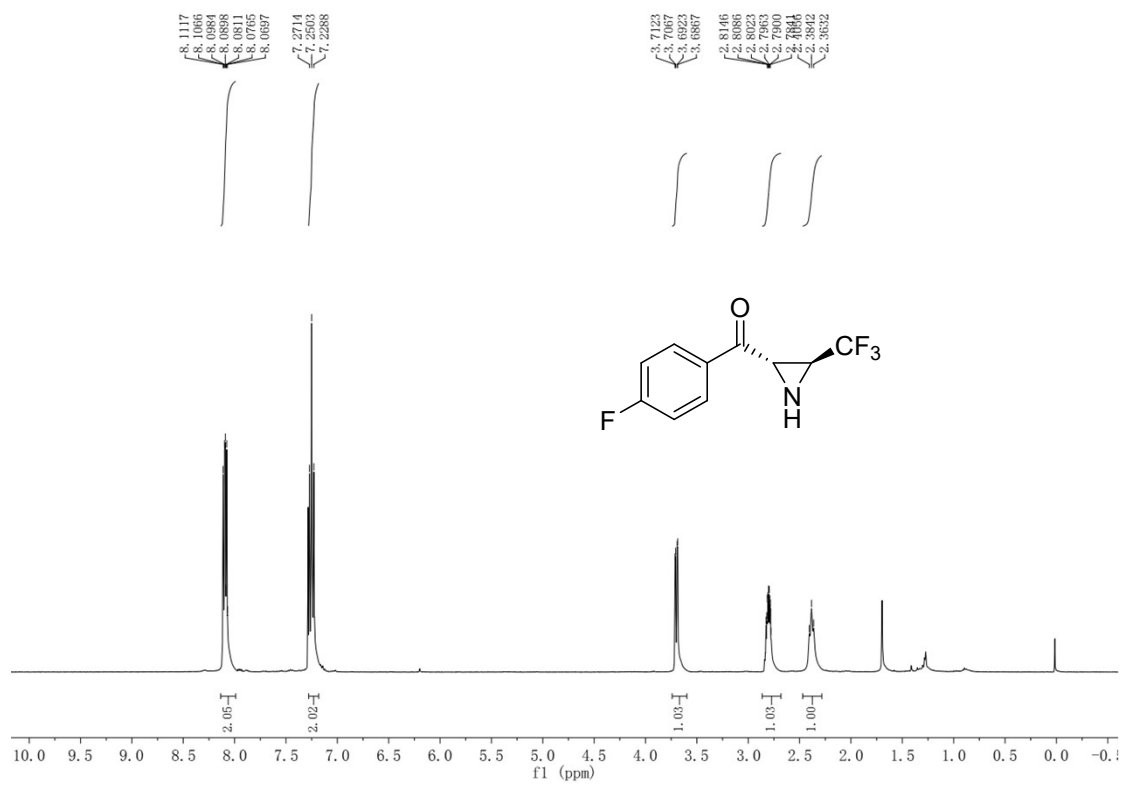

$^{13}\text{C}$  NMR (100 MHz,  $\text{CDCl}_3$ ) of **2h**:

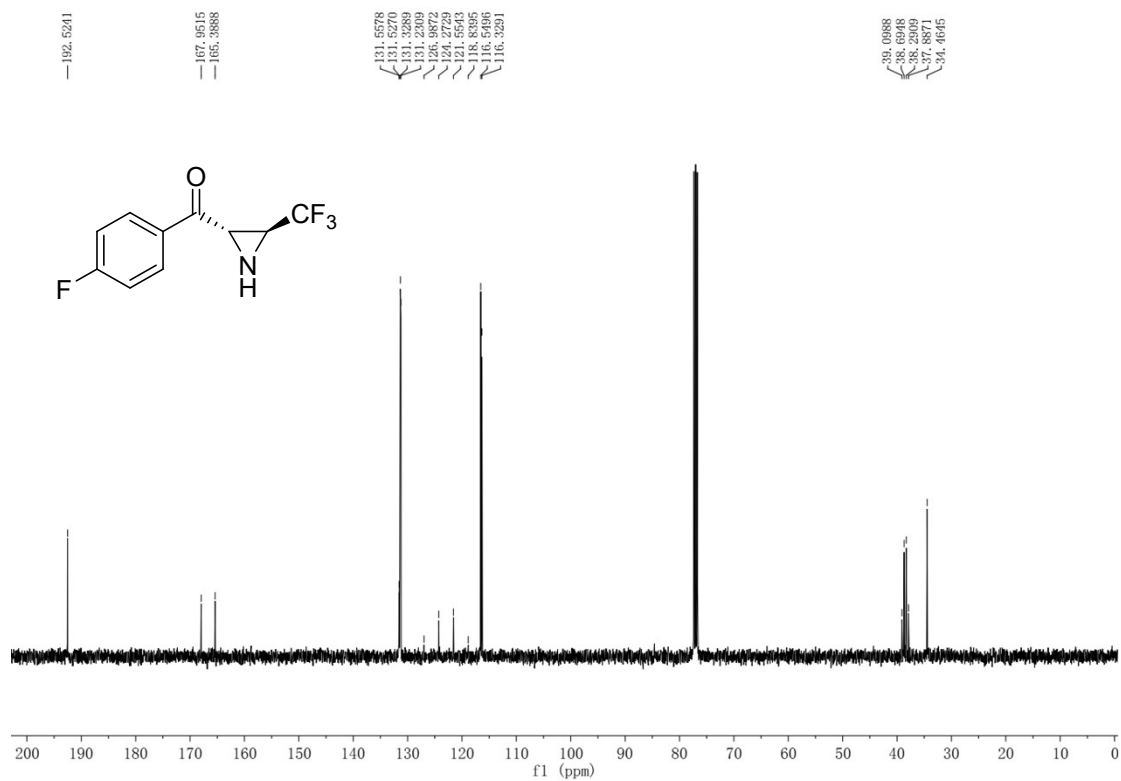

$^{19}\text{F}$  NMR (376 MHz,  $\text{CDCl}_3$ ) of **2h**:

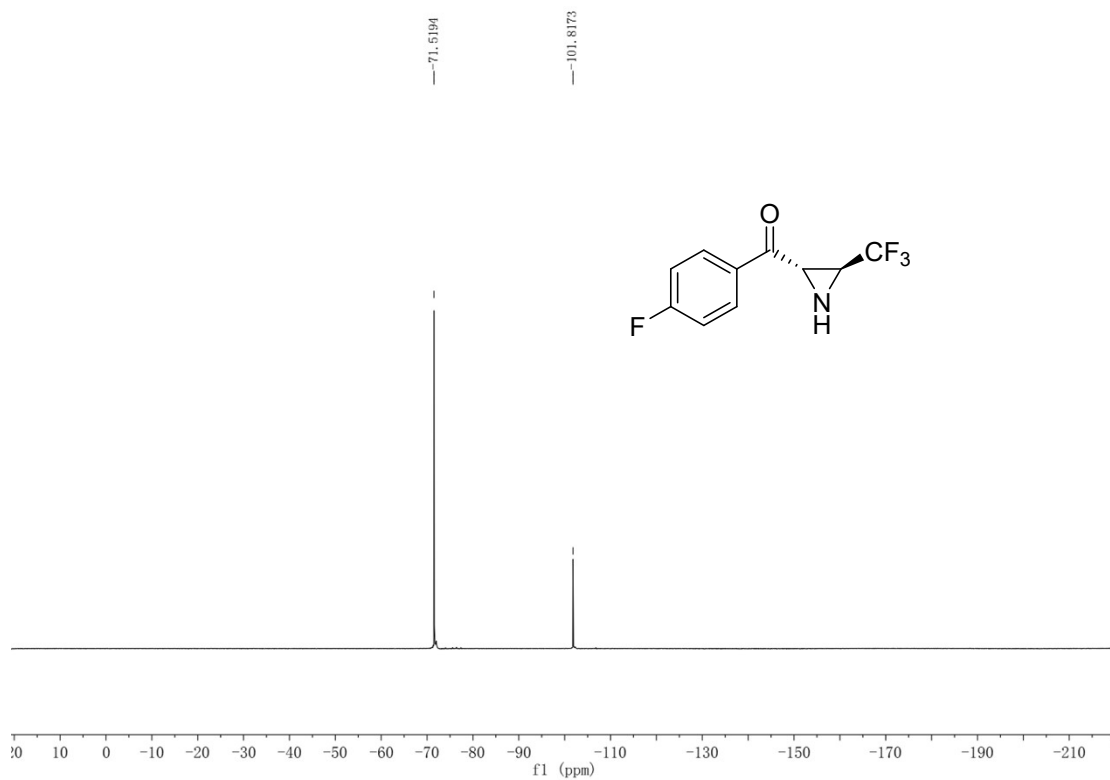

$^1\text{H}$  NMR (400 MHz,  $\text{CDCl}_3$ ) of **2i**:

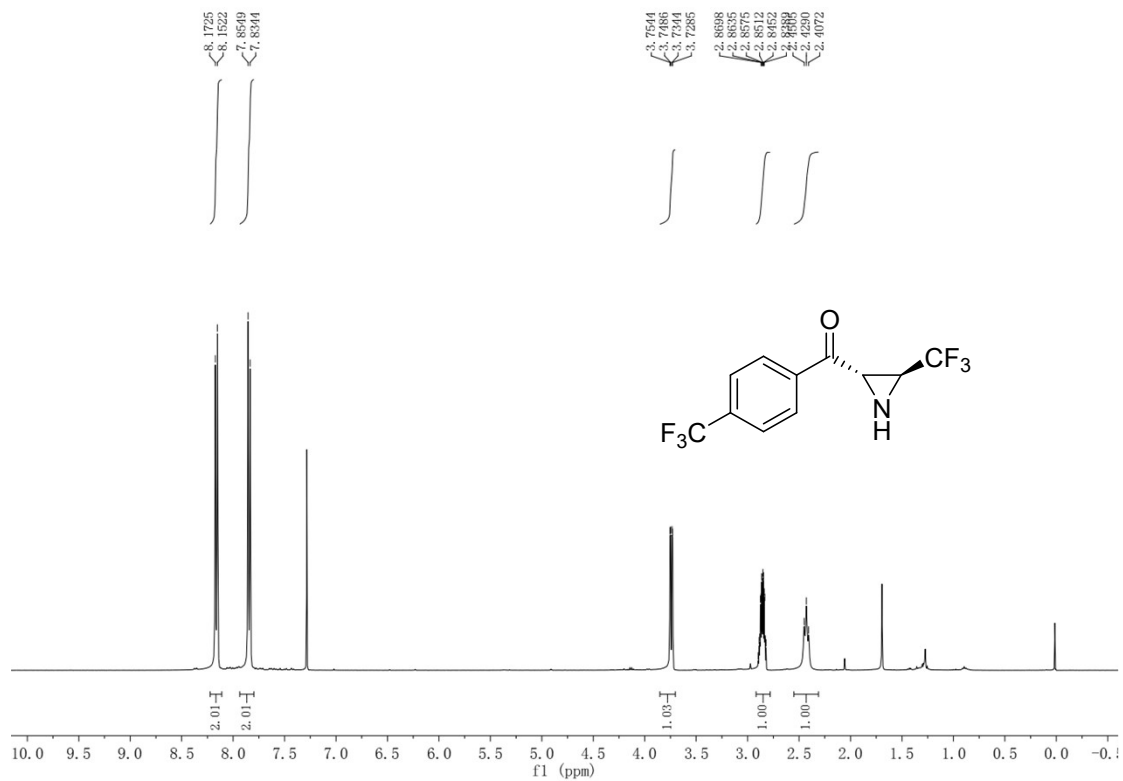

$^{13}\text{C}$  NMR (100 MHz,  $\text{CDCl}_3$ ) of **2i**:

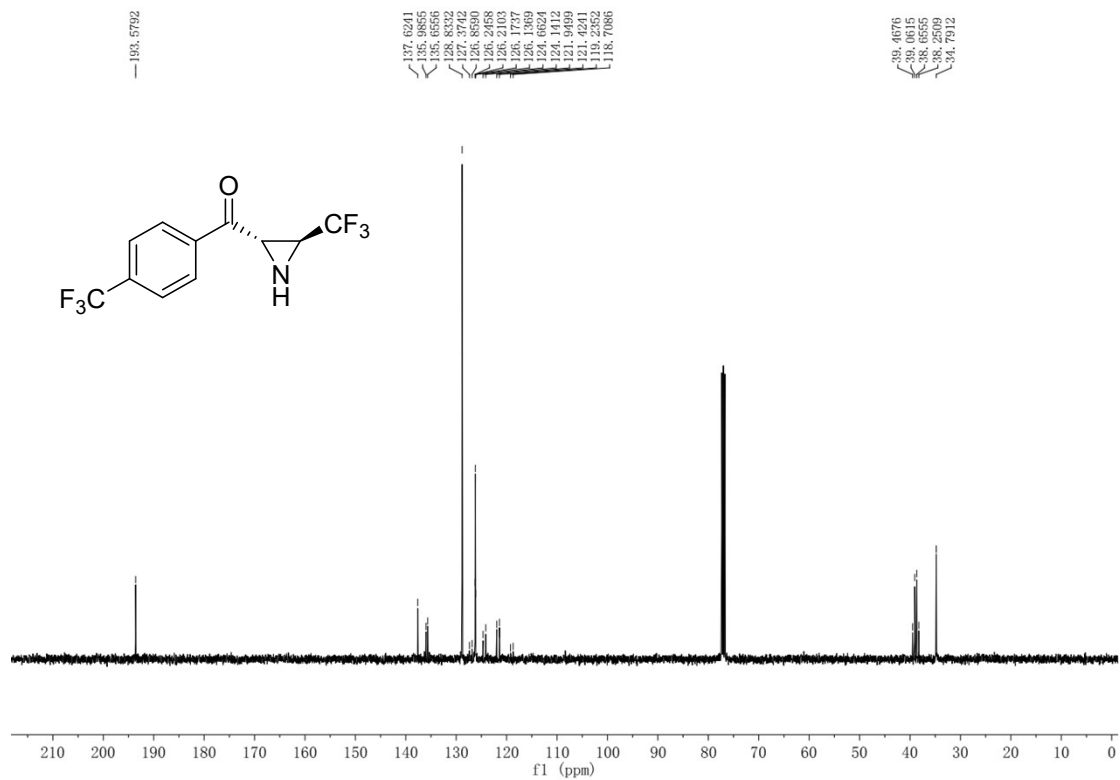



$^{19}\text{F}$  NMR (376 MHz,  $\text{CDCl}_3$ ) of **2i**:

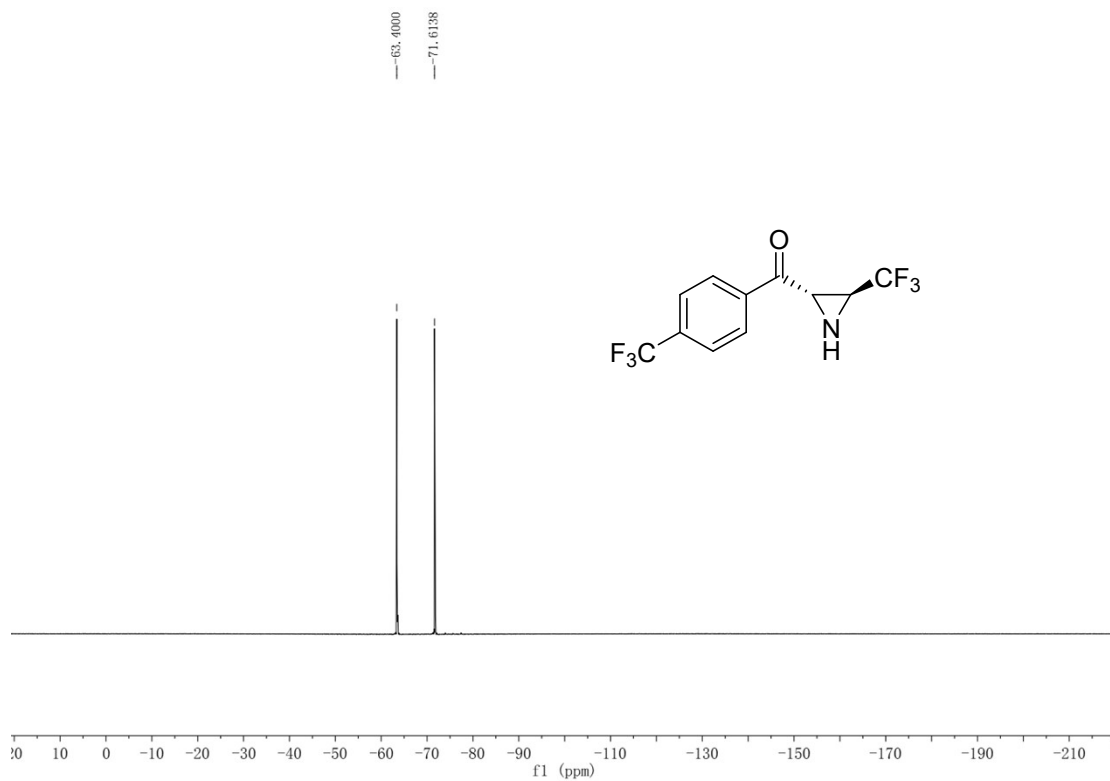

$^1\text{H}$  NMR (400 MHz,  $\text{CDCl}_3$ ) of **2j**:

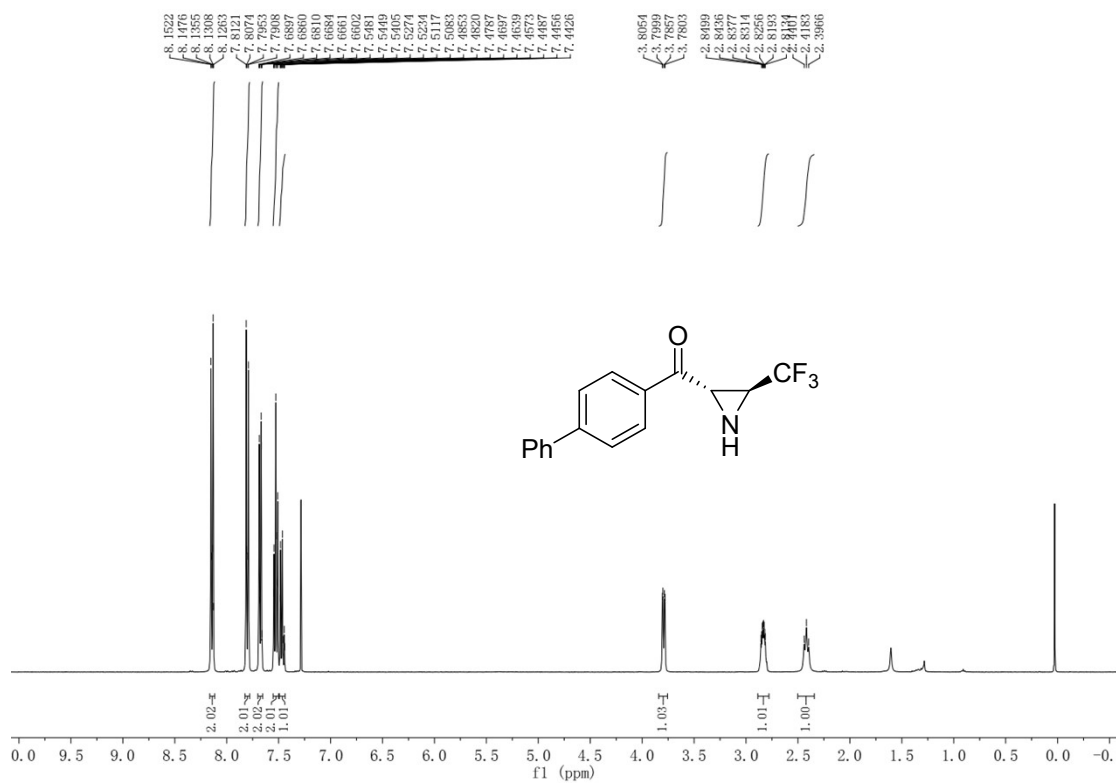

$^{13}\text{C}$  NMR (100 MHz,  $\text{CDCl}_3$ ) of **2j**:

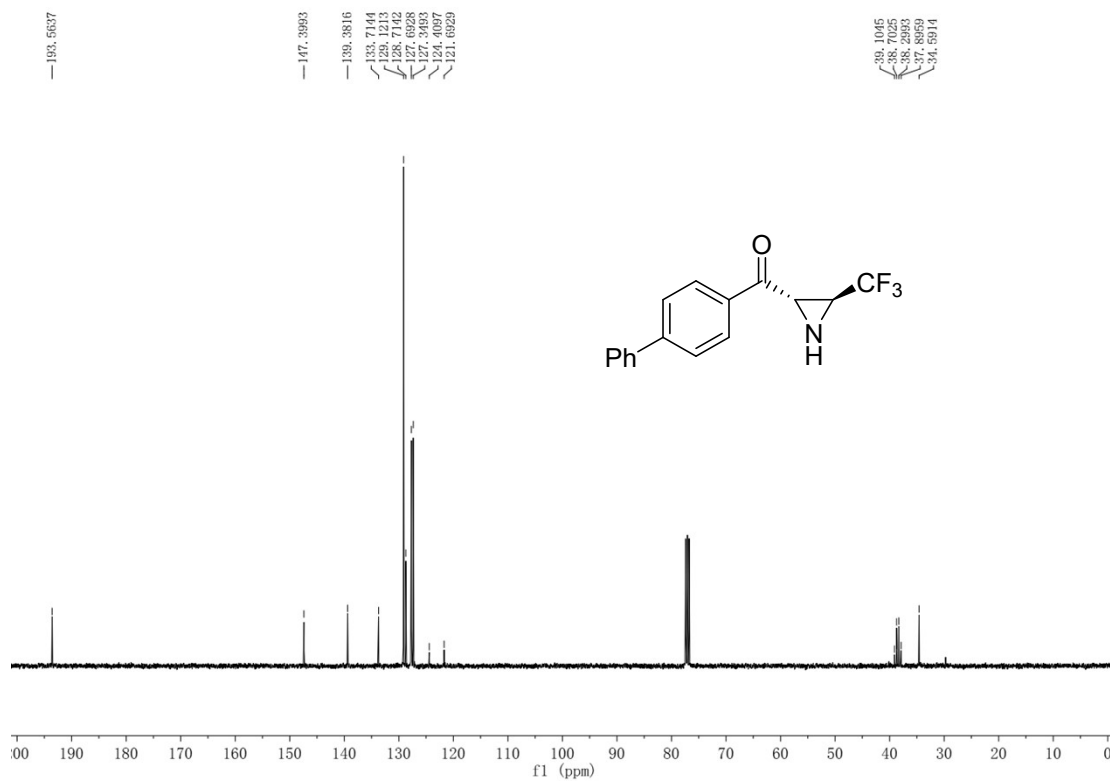

$^{19}\text{F}$  NMR (376 MHz,  $\text{CDCl}_3$ ) of **2j**:

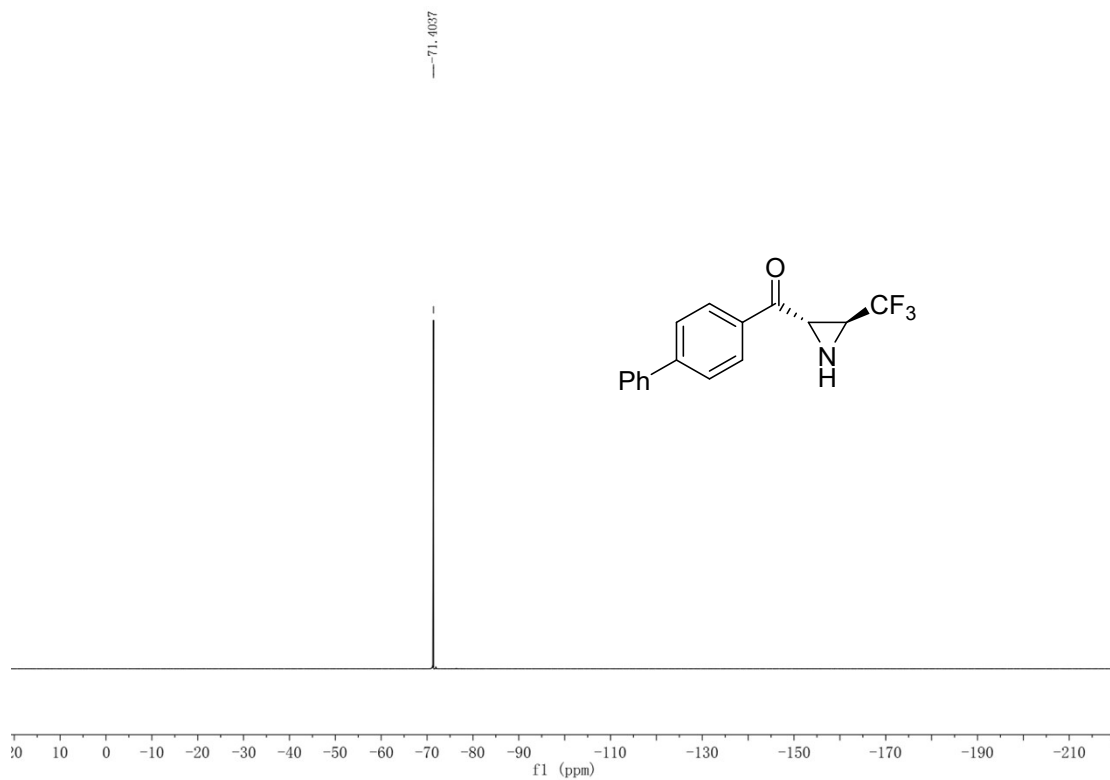

$^1\text{H}$  NMR (400 MHz,  $\text{CDCl}_3$ ) of **2k**:

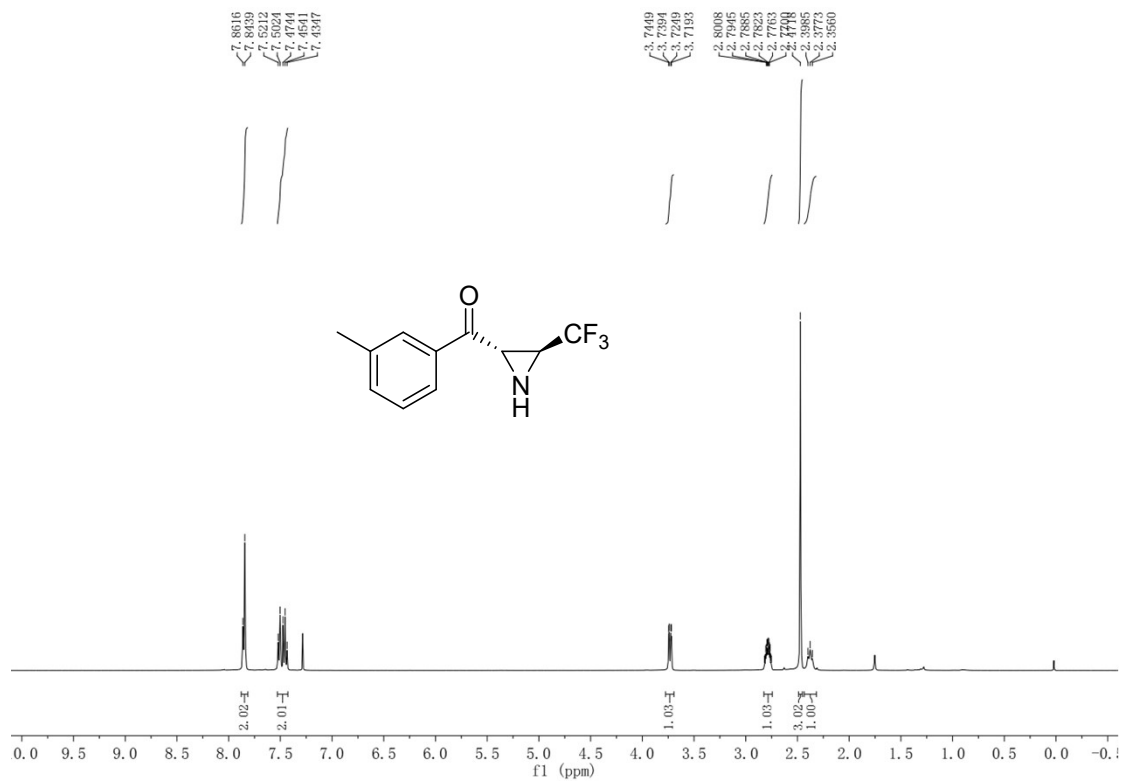

$^{13}\text{C}$  NMR (100 MHz,  $\text{CDCl}_3$ ) of **2k**:

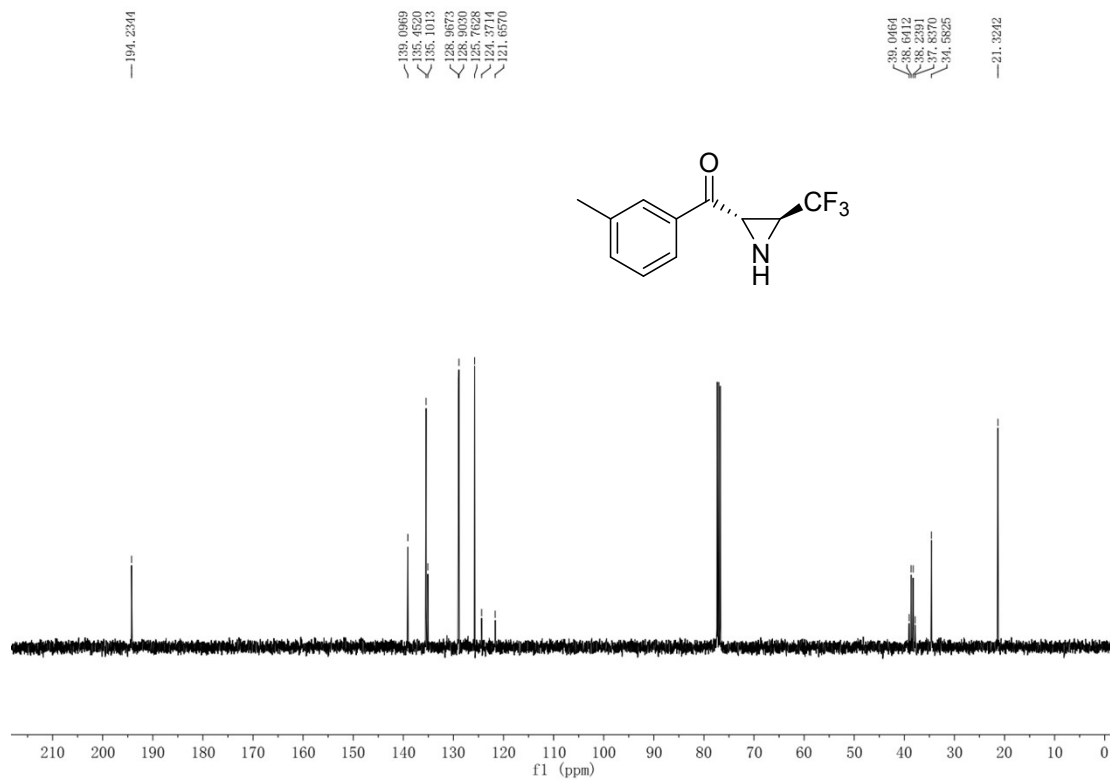

$^{19}\text{F}$  NMR (376 MHz,  $\text{CDCl}_3$ ) of **2k**:

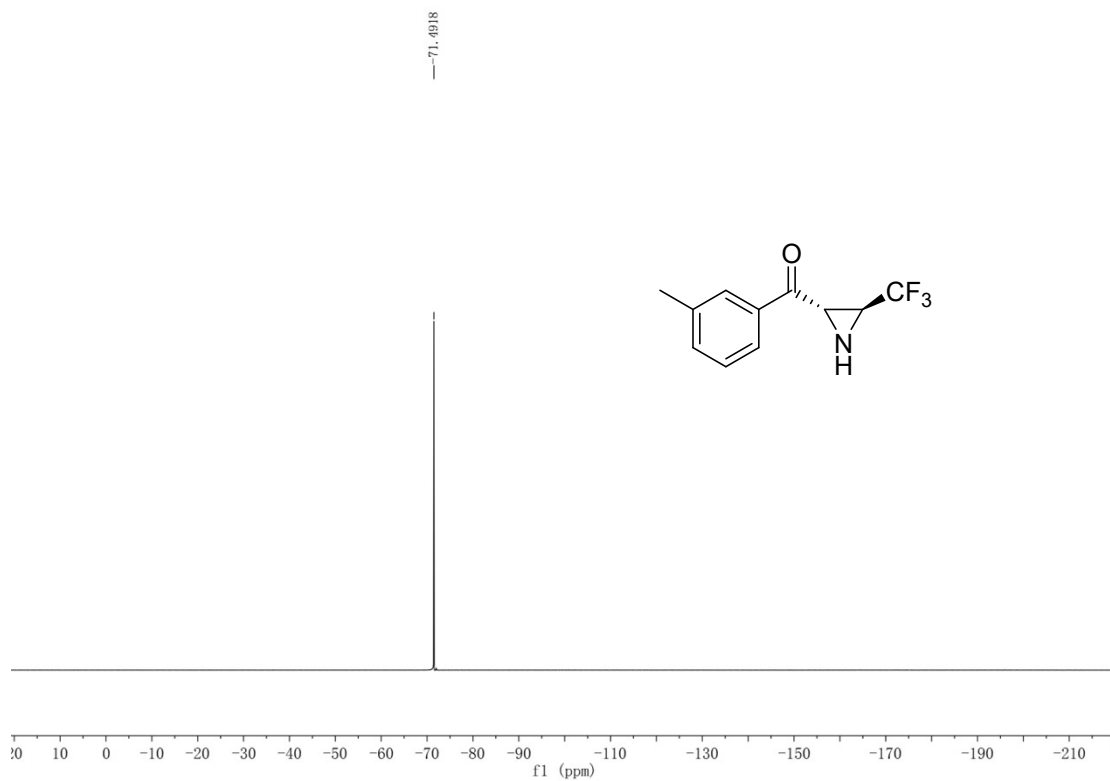

$^1\text{H}$  NMR (400 MHz,  $\text{CDCl}_3$ ) of **2l**:

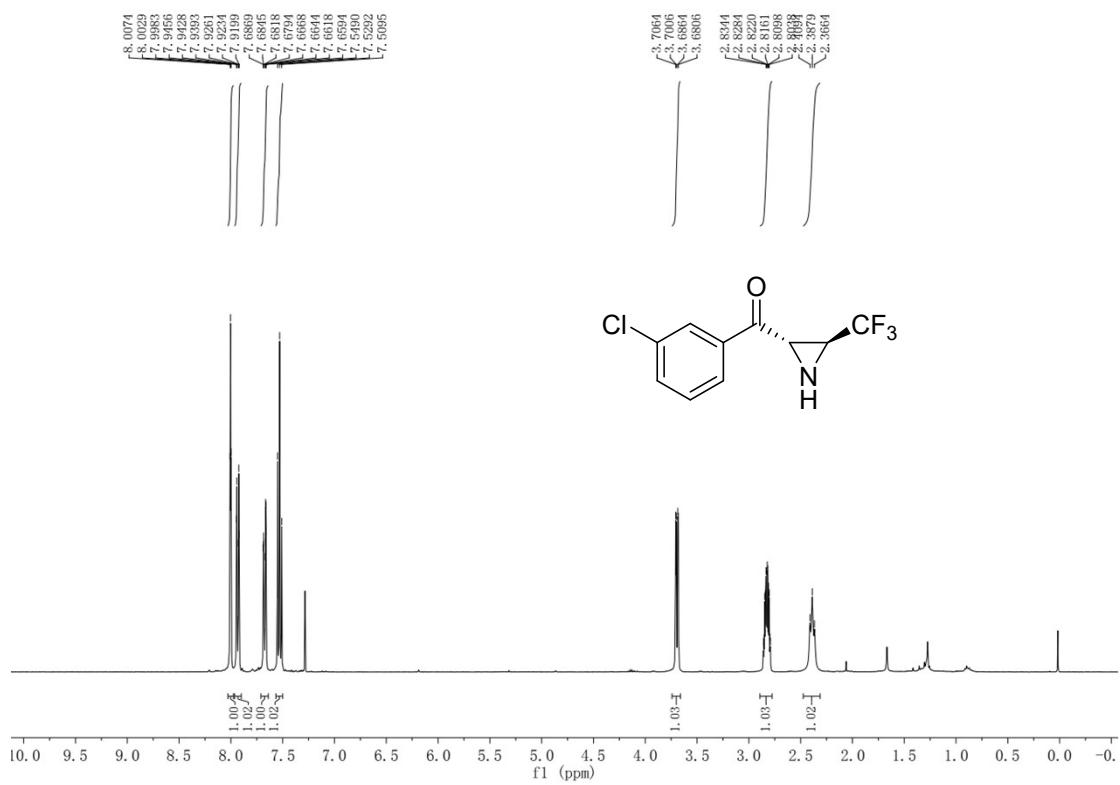

<sup>13</sup>C NMR (100 MHz, CDCl<sub>3</sub>) of **2l**:

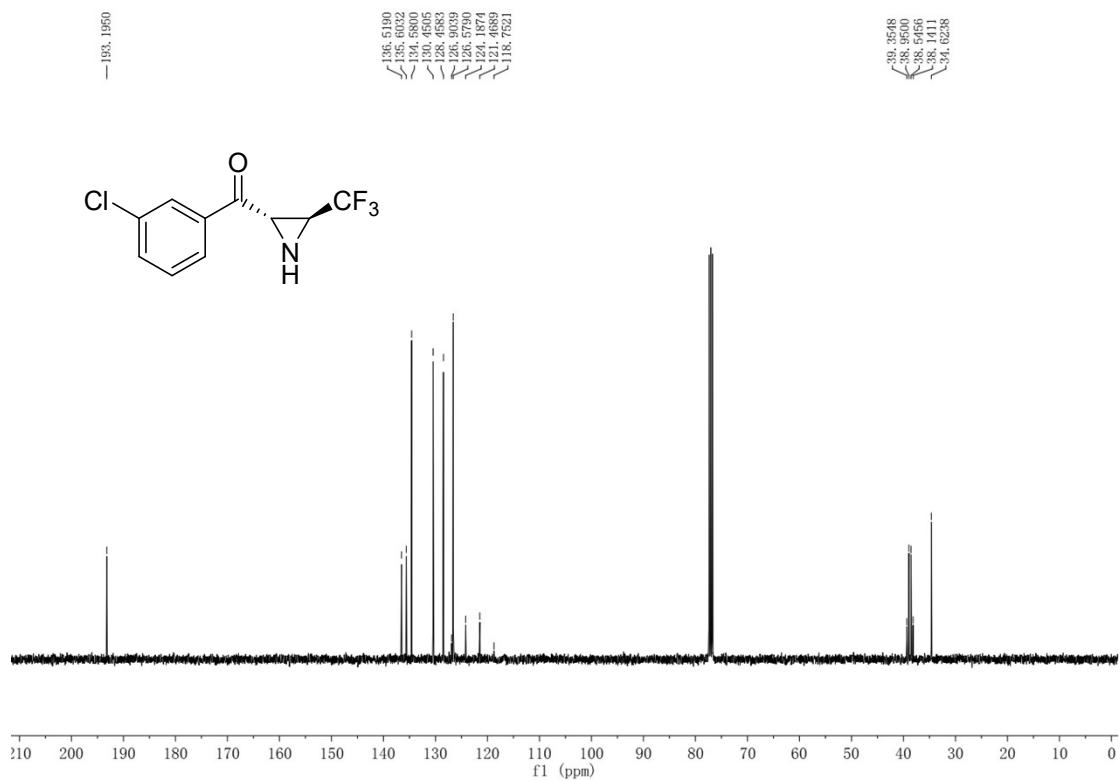

<sup>19</sup>F NMR (376 MHz, CDCl<sub>3</sub>) of **2l**:

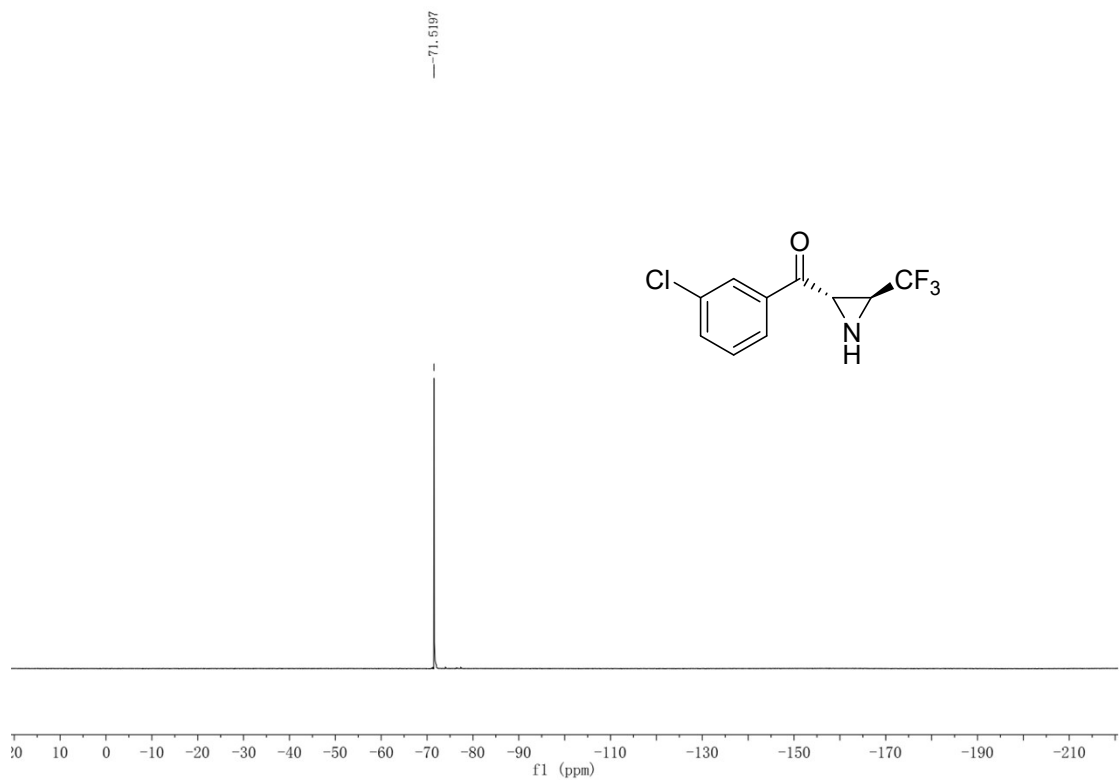

$^1\text{H}$  NMR (400 MHz,  $\text{CDCl}_3$ ) of **2m**:

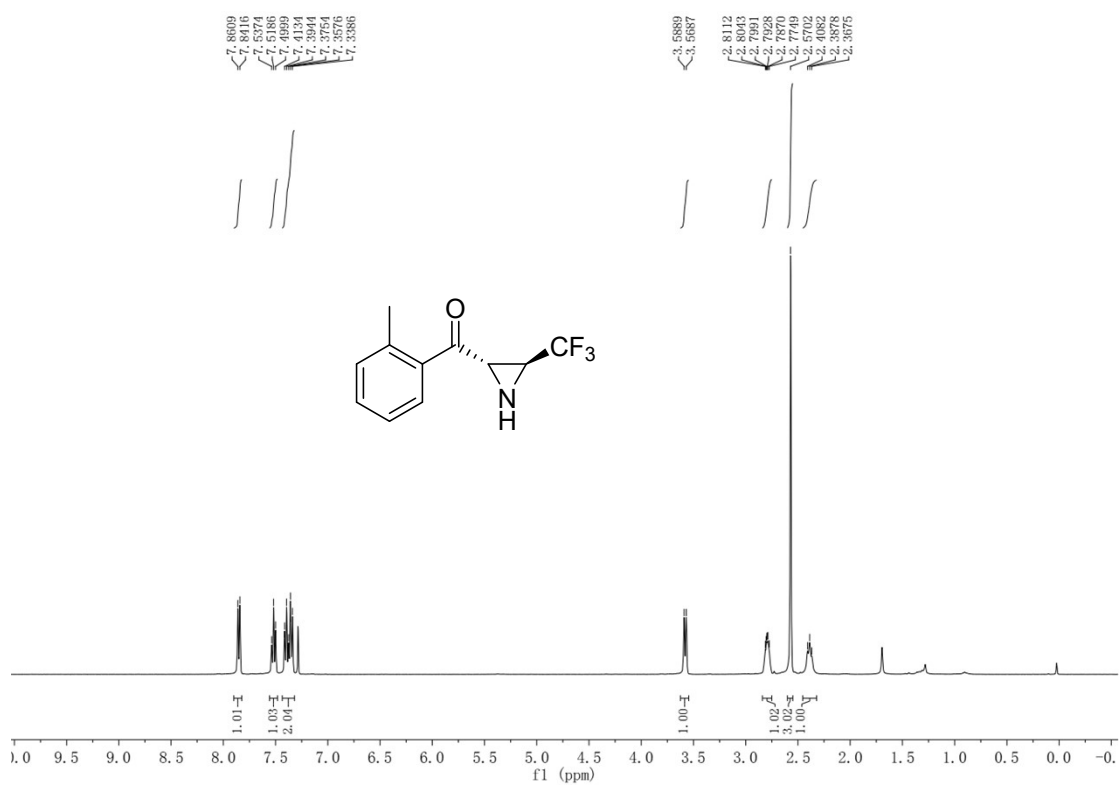

$^{13}\text{C}$  NMR (100 MHz,  $\text{CDCl}_3$ ) of **2m**:

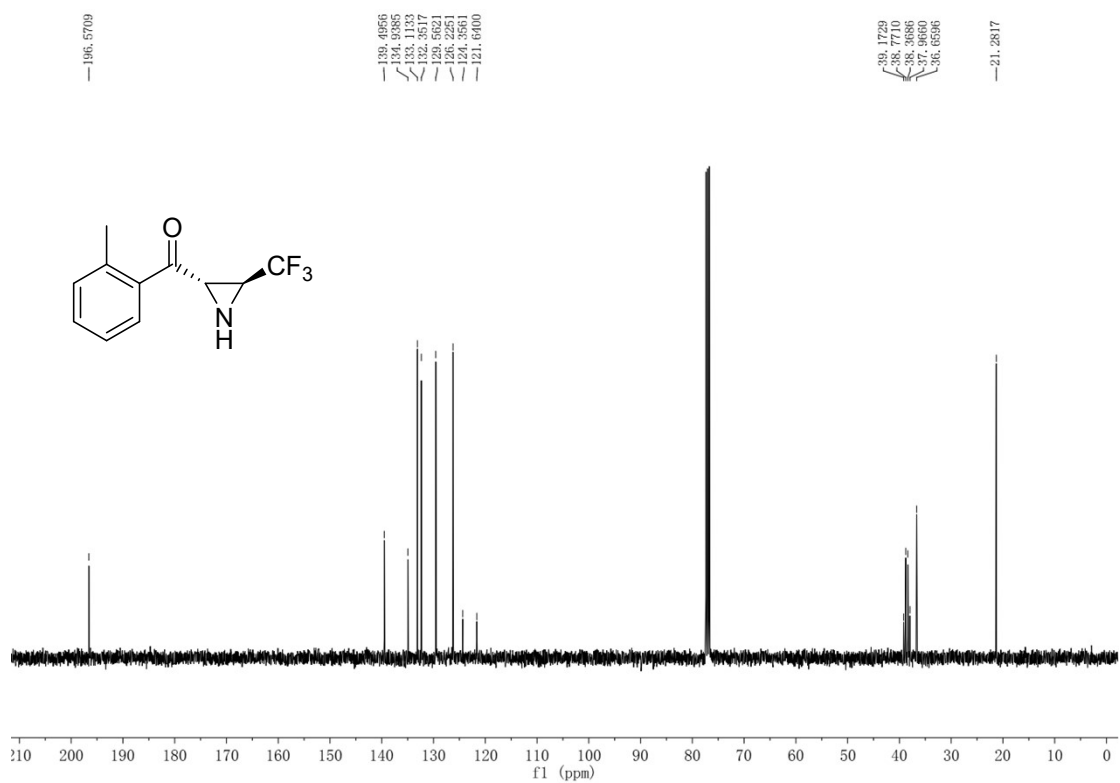

$^{19}\text{F}$  NMR (376 MHz,  $\text{CDCl}_3$ ) of **2m**:

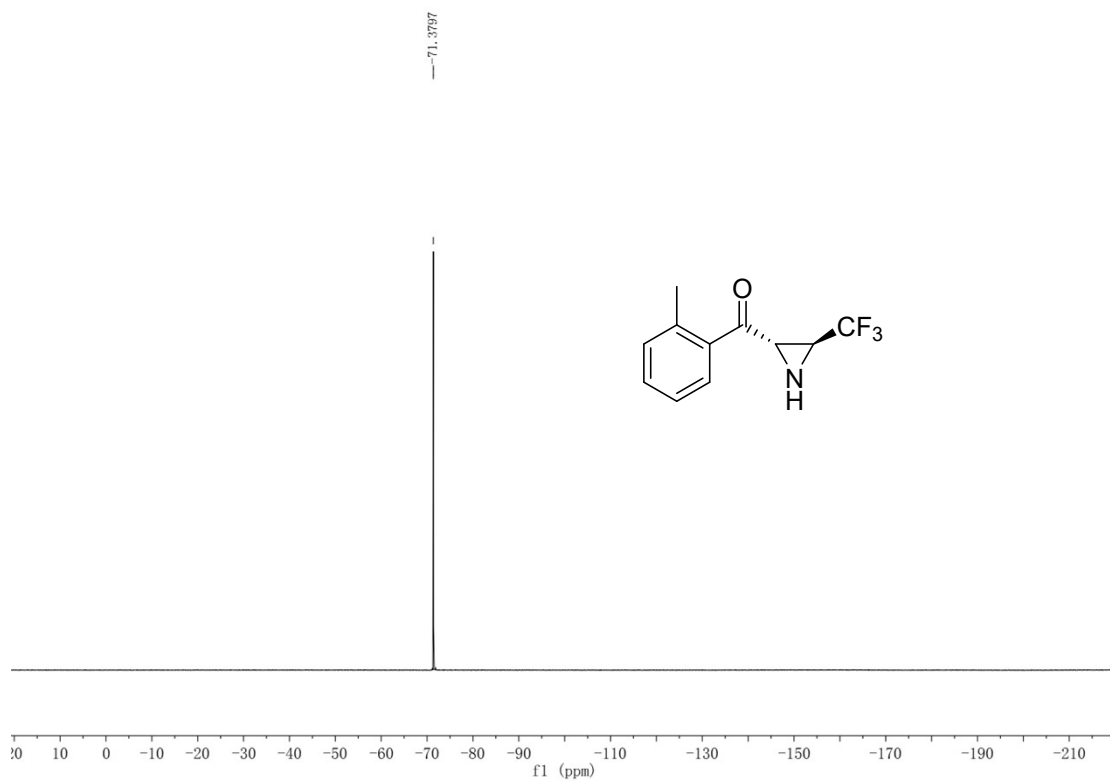

$^1\text{H}$  NMR (400 MHz,  $\text{CDCl}_3$ ) of **2n**:

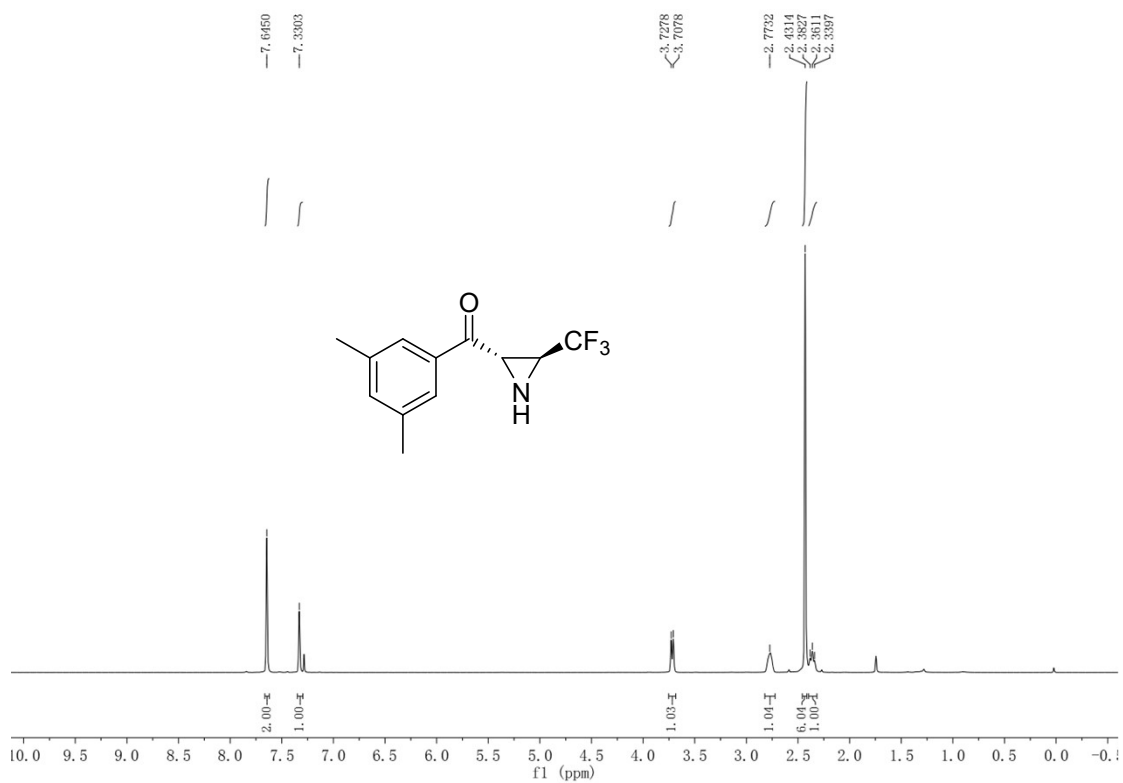

<sup>13</sup>C NMR (100 MHz, CDCl<sub>3</sub>) of **2n**:

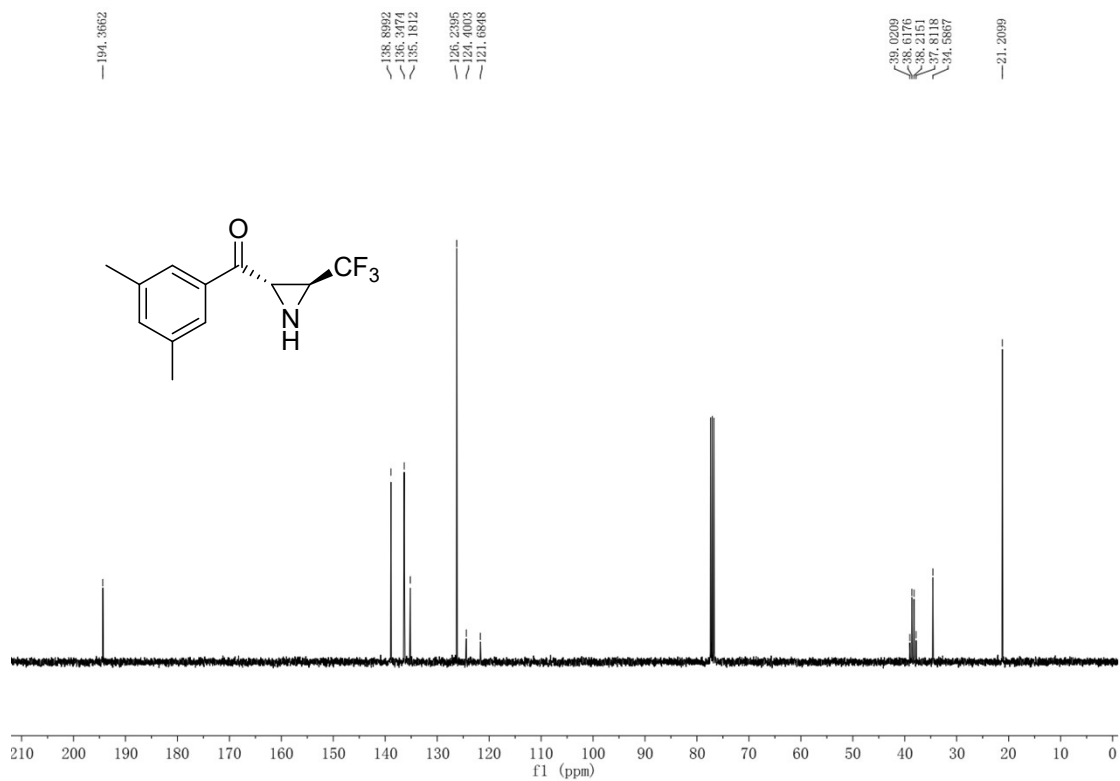

<sup>19</sup>F NMR (376 MHz, CDCl<sub>3</sub>) of **2n**:

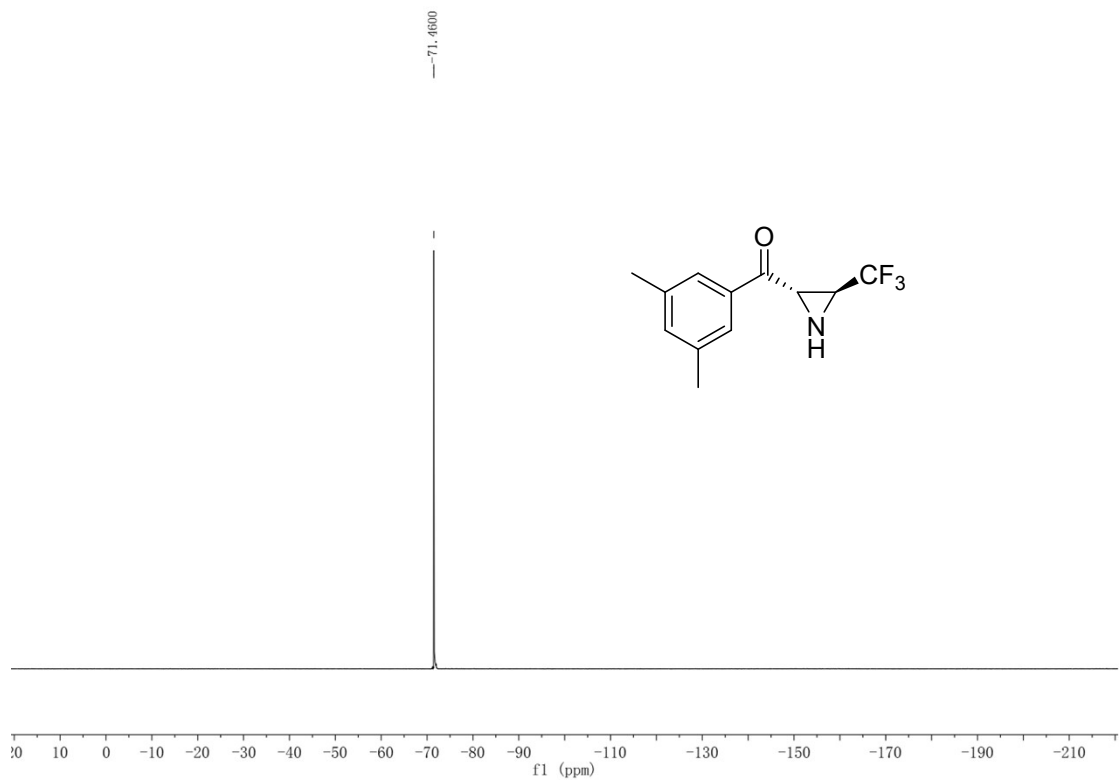



$^1\text{H}$  NMR (400 MHz,  $\text{CDCl}_3$ ) of **2o**:

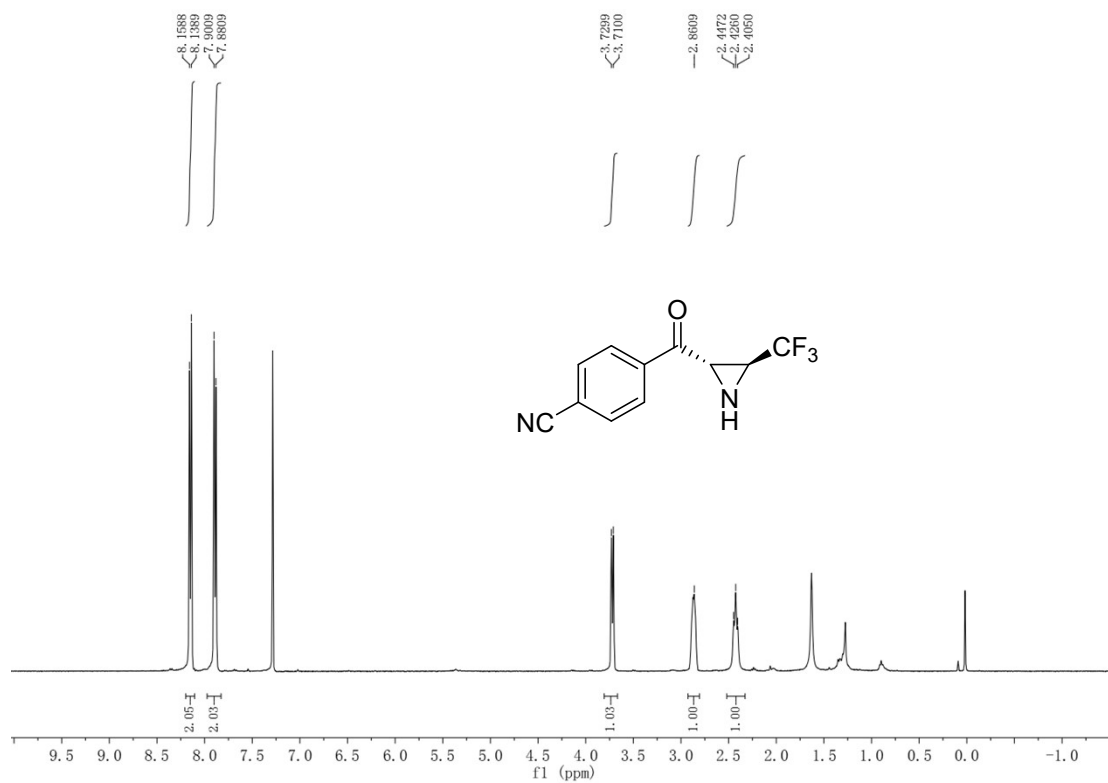

$^{13}\text{C}$  NMR (100 MHz,  $\text{CDCl}_3$ ) of **2o**:

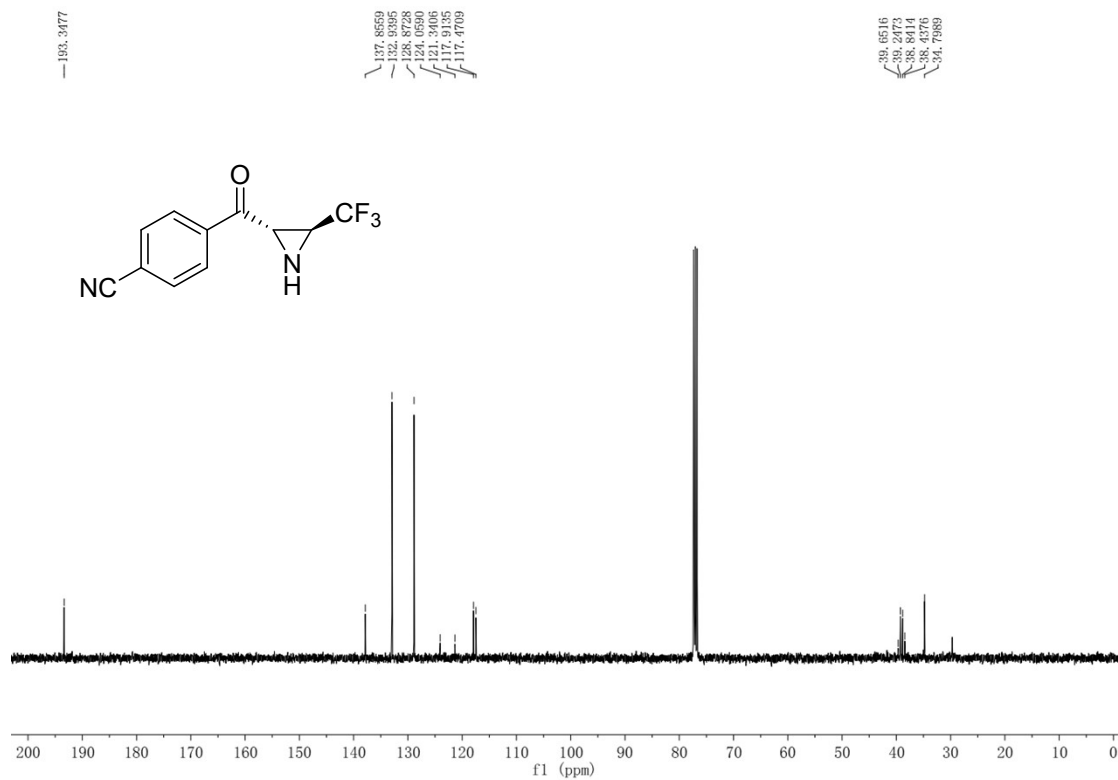

$^{19}\text{F}$  NMR (376 MHz,  $\text{CDCl}_3$ ) of **2o**:

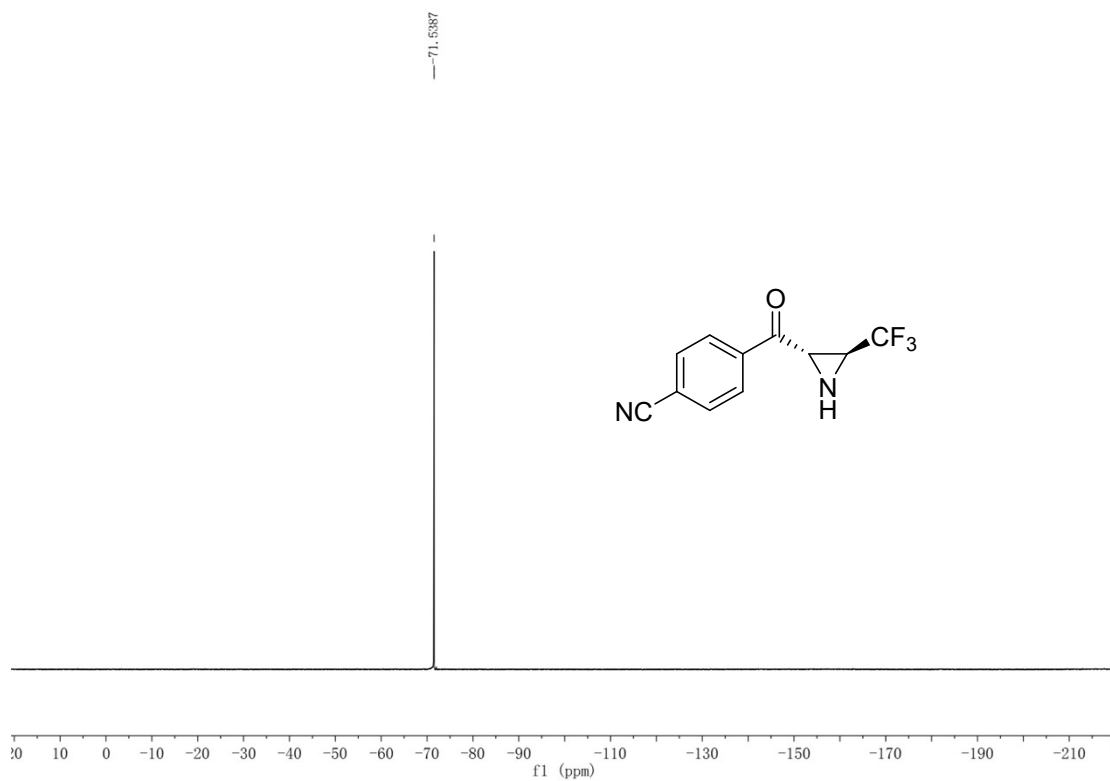

$^1\text{H}$  NMR (400 MHz,  $\text{CDCl}_3$ ) of **2p**:

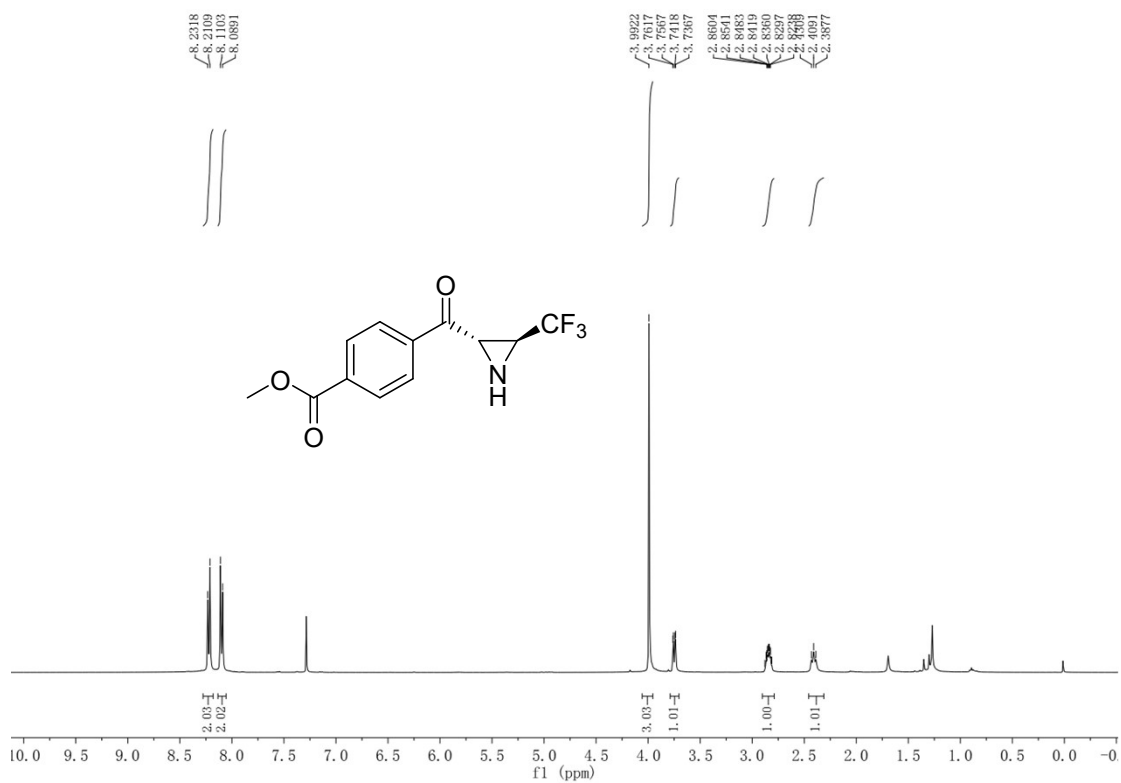

$^{13}\text{C}$  NMR (100 MHz,  $\text{CDCl}_3$ ) of **2p**:

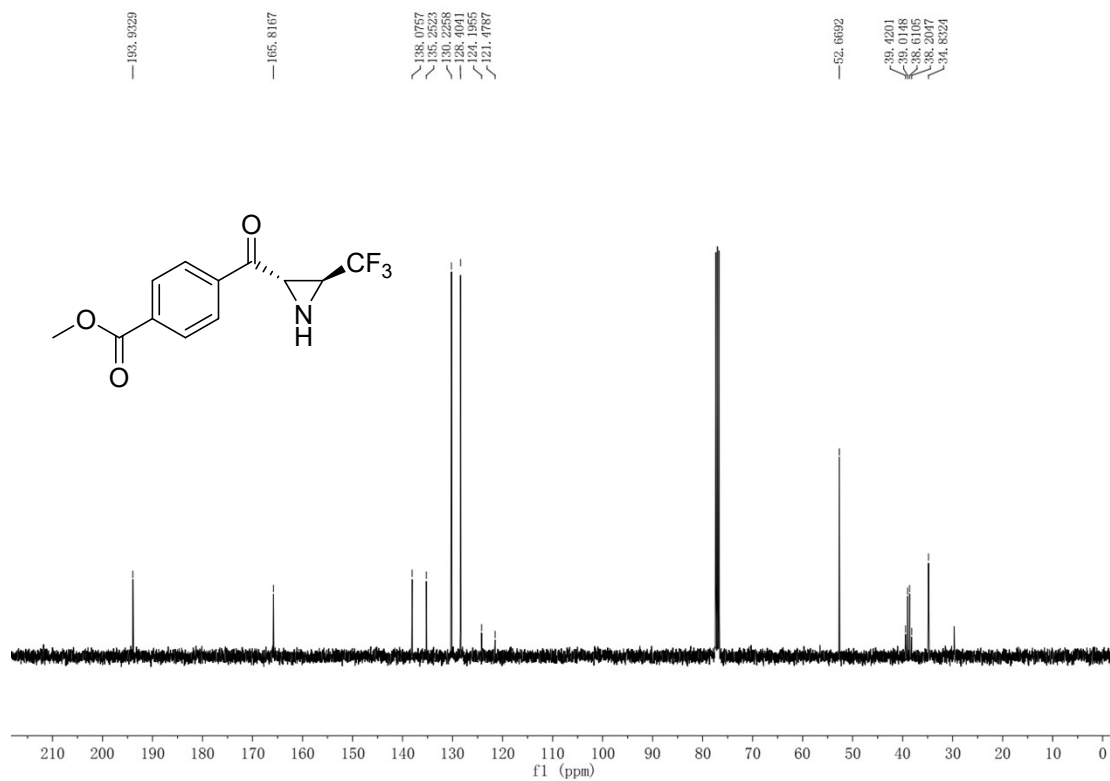

$^{19}\text{F}$  NMR (376 MHz,  $\text{CDCl}_3$ ) of **2p**:

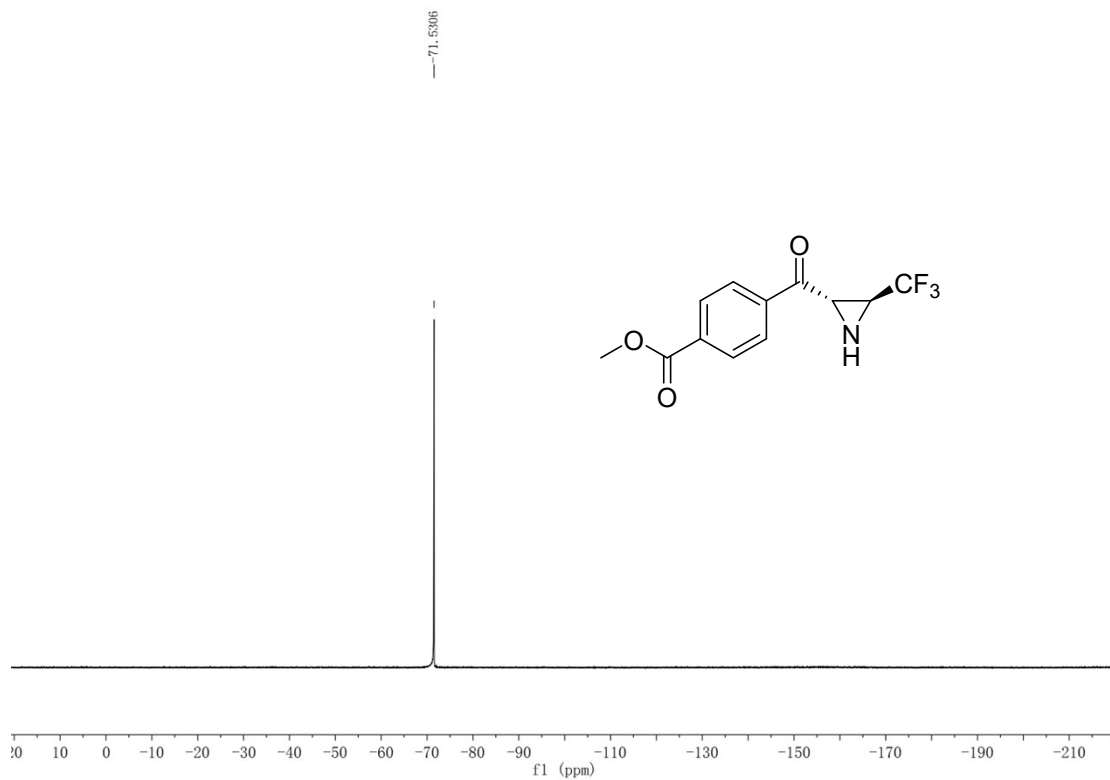

$^1\text{H}$  NMR (400 MHz,  $\text{CDCl}_3$ ) of **2q**:

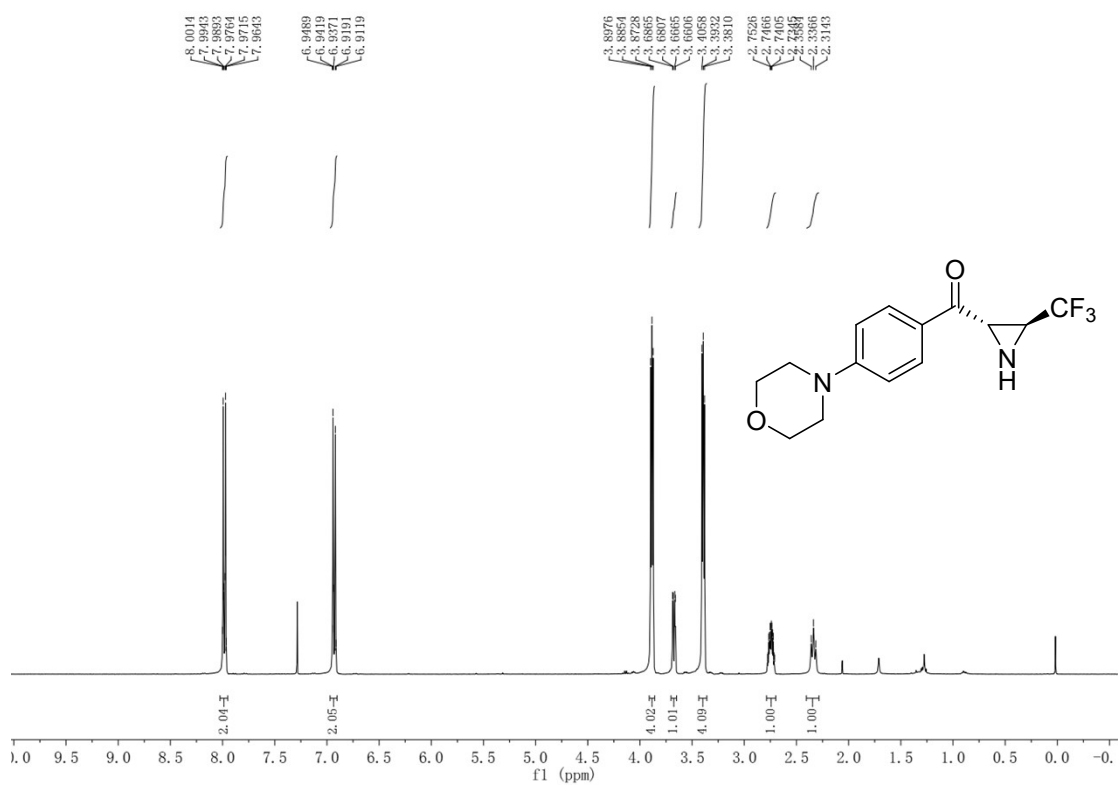

$^{13}\text{C}$  NMR (100 MHz,  $\text{CDCl}_3$ ) of **2q**:

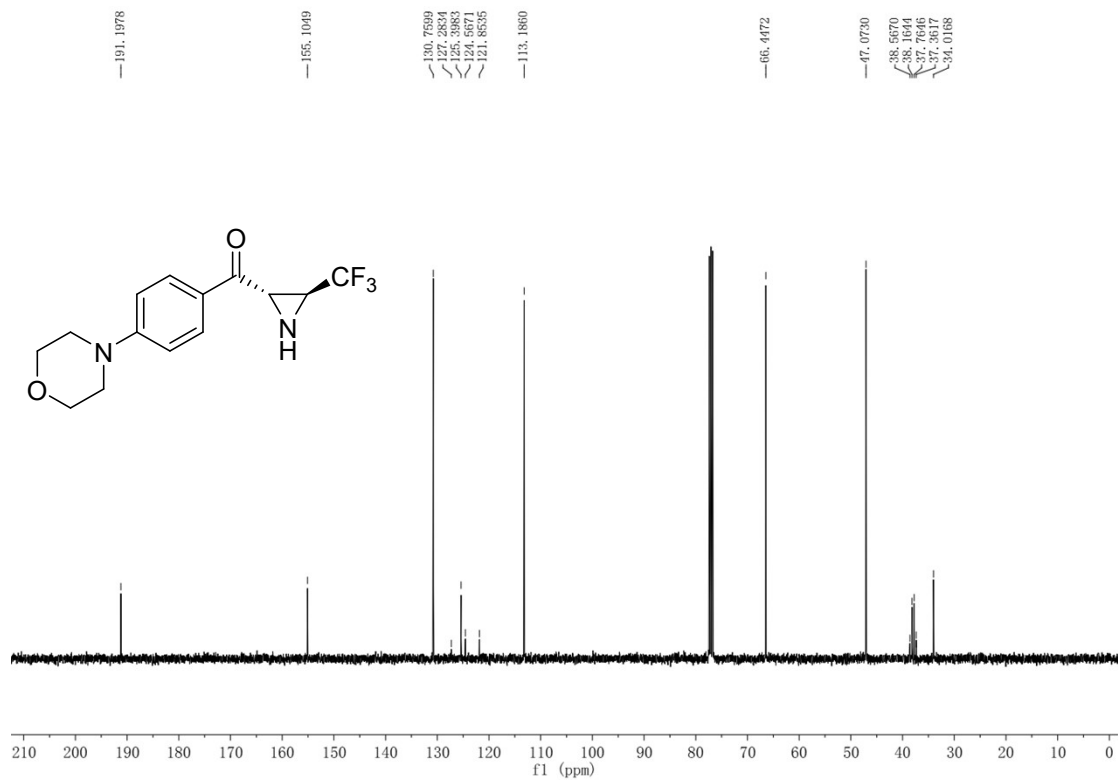

$^{19}\text{F}$  NMR (376 MHz,  $\text{CDCl}_3$ ) of **2q**:

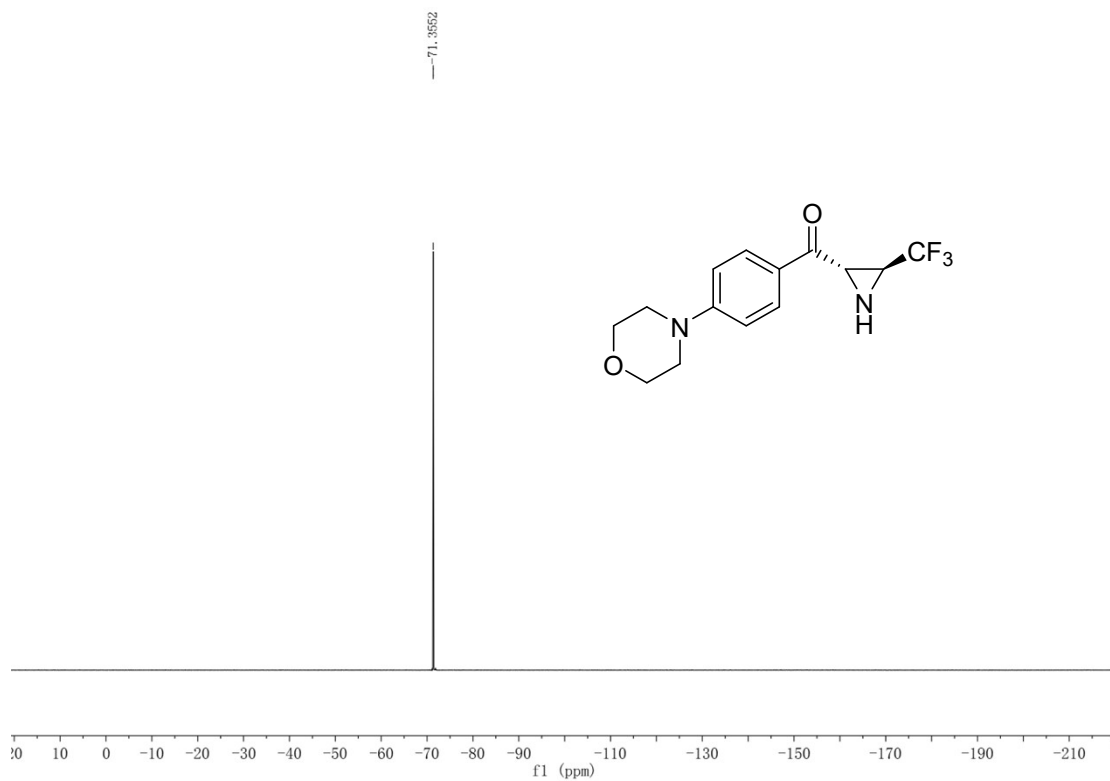

$^1\text{H}$  NMR (400 MHz,  $\text{CDCl}_3$ ) of **2r**:

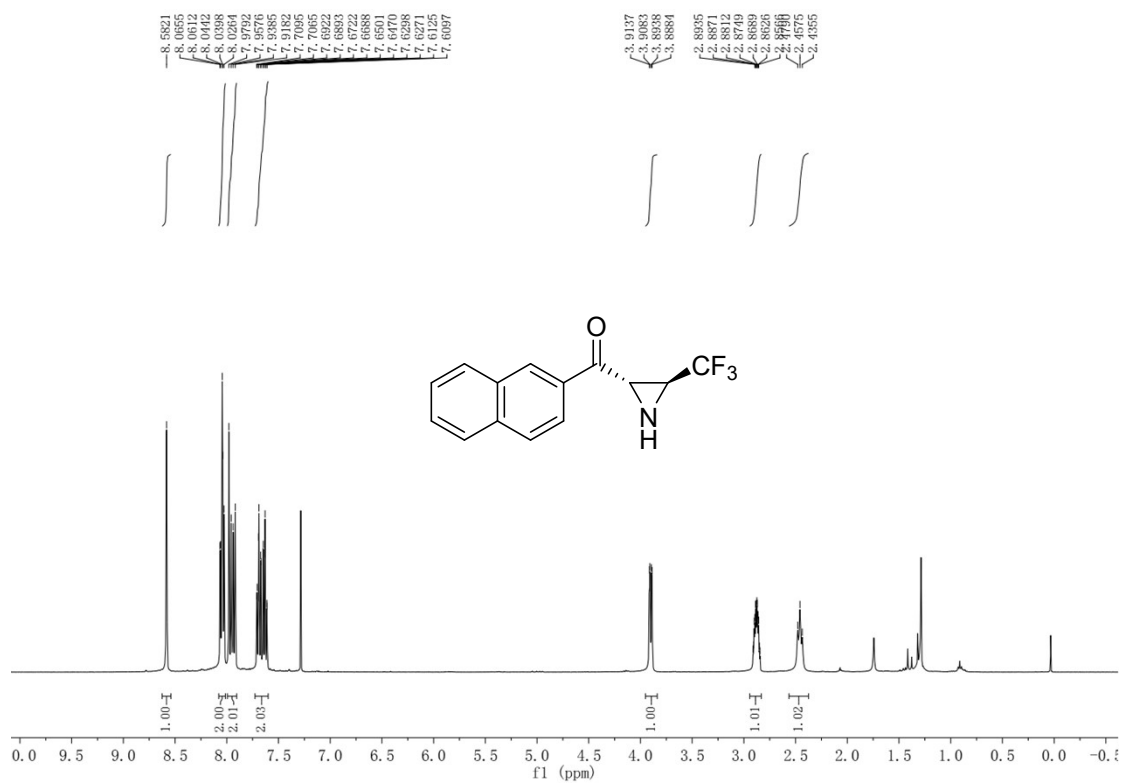

$^{13}\text{C}$  NMR (100 MHz,  $\text{CDCl}_3$ ) of **2r**:

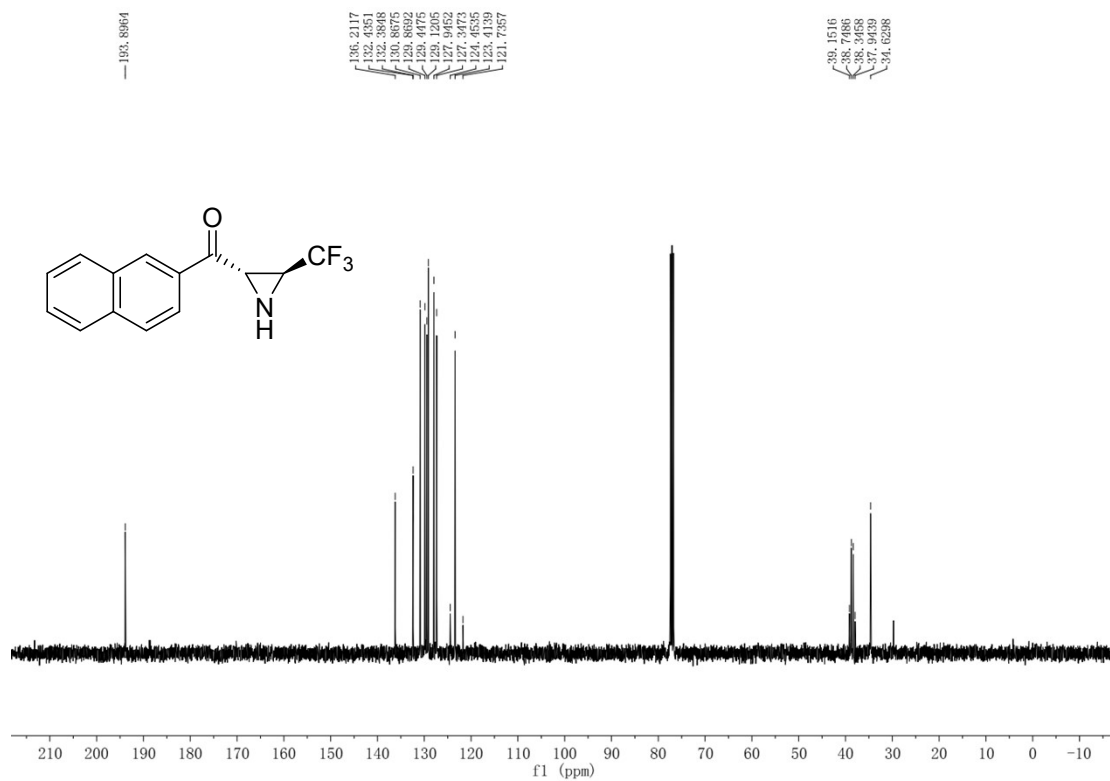

$^{19}\text{F}$  NMR (376 MHz,  $\text{CDCl}_3$ ) of **2r**:

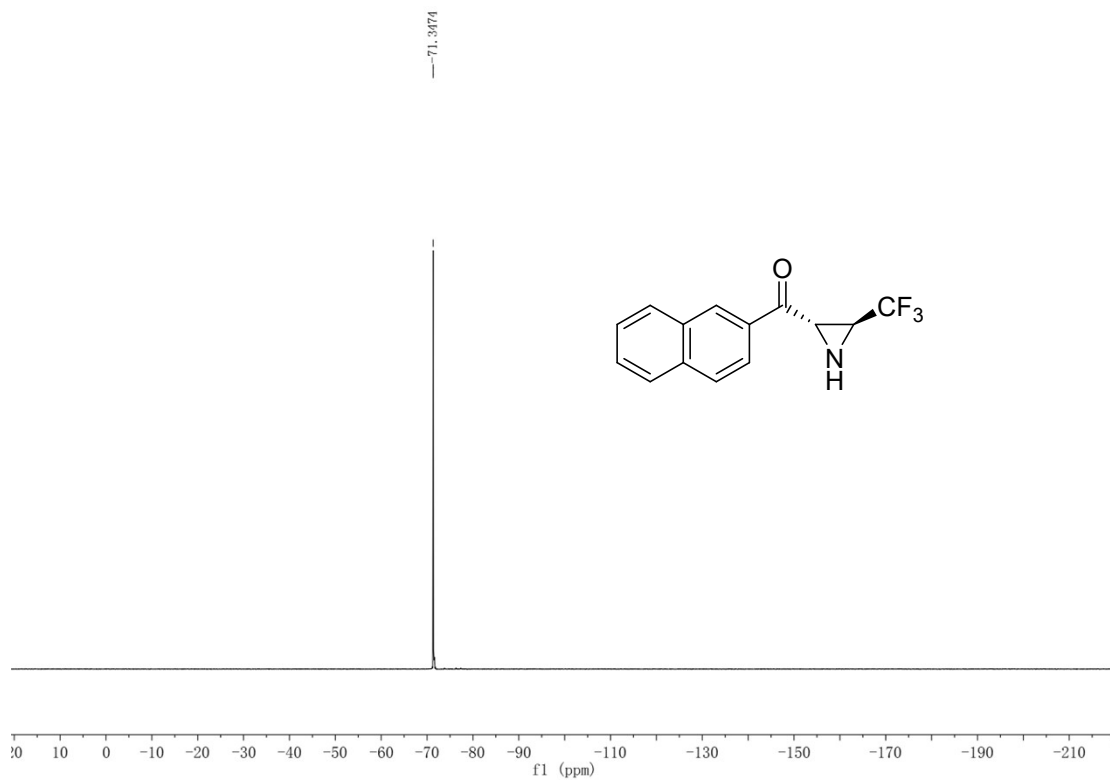

$^1\text{H}$  NMR (400 MHz,  $\text{CDCl}_3$ ) of **2s**:

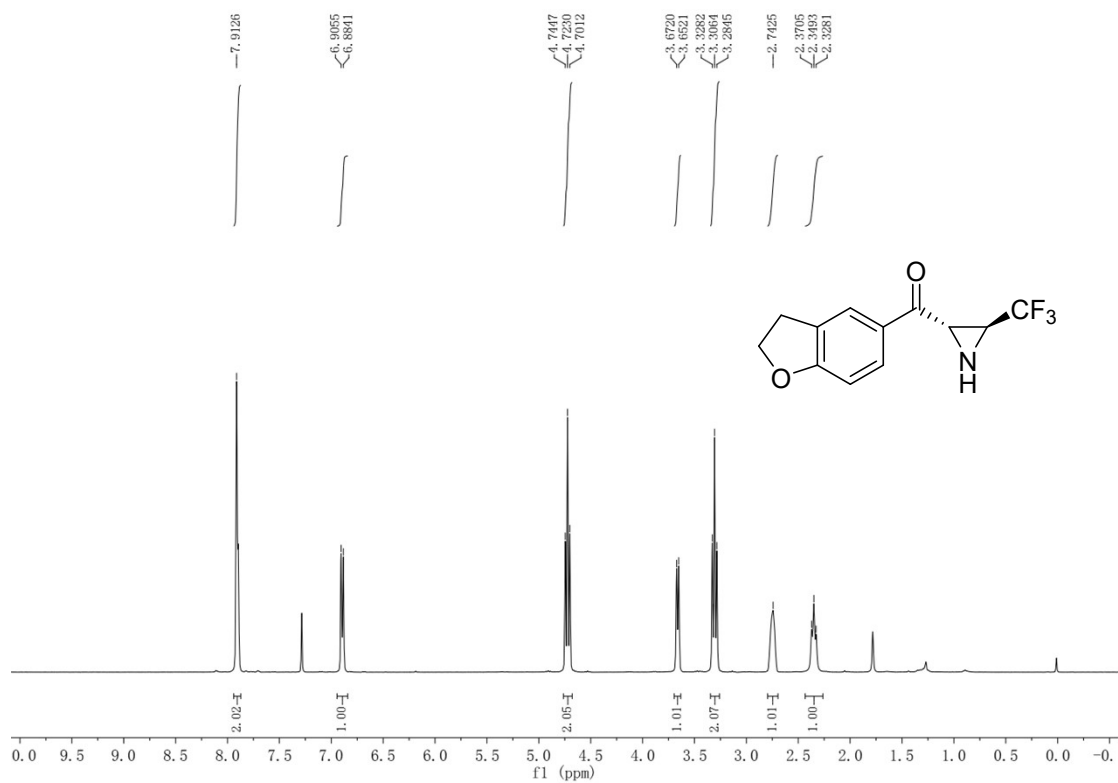

$^{13}\text{C}$  NMR (100 MHz,  $\text{CDCl}_3$ ) of **2s**:

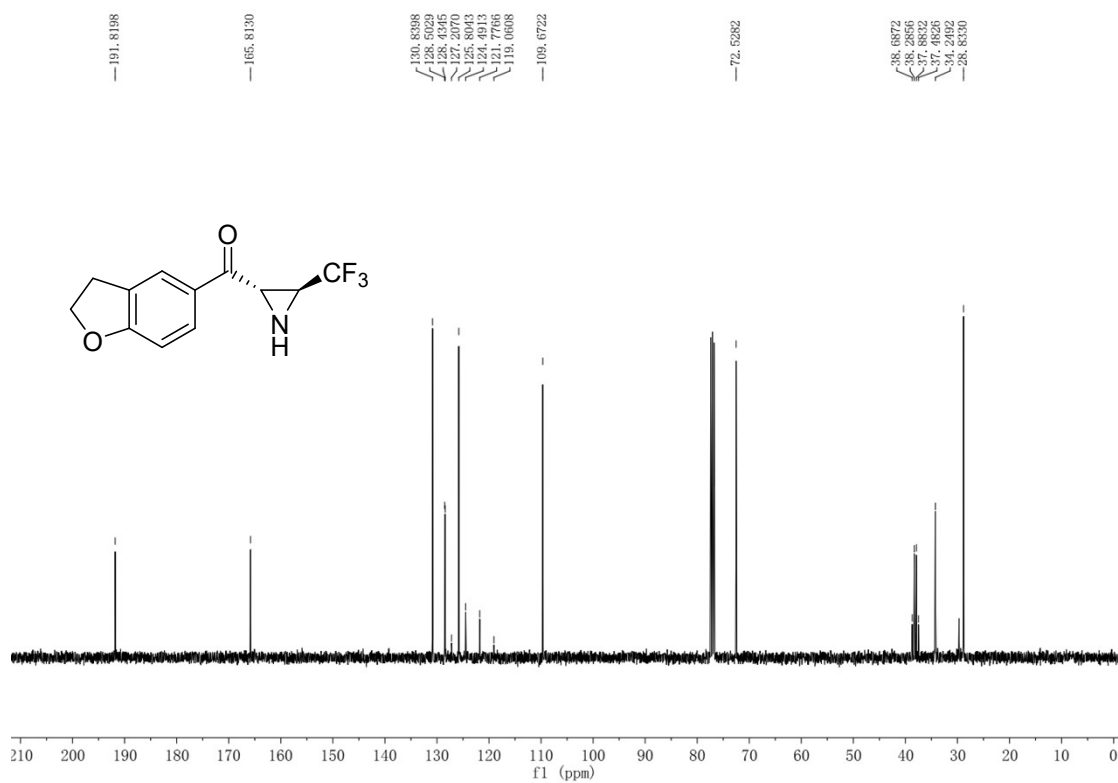

$^{19}\text{F}$  NMR (376 MHz,  $\text{CDCl}_3$ ) of **2s**:

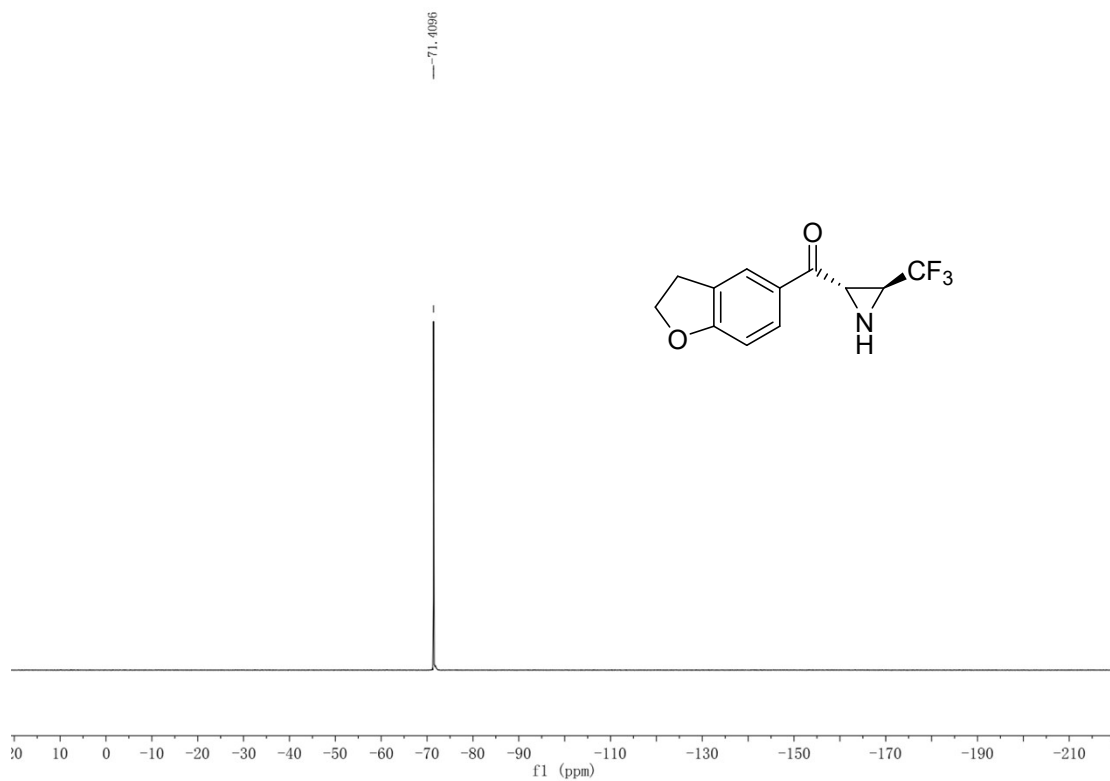

$^1\text{H}$  NMR (400 MHz,  $\text{CDCl}_3$ ) of **2t**:

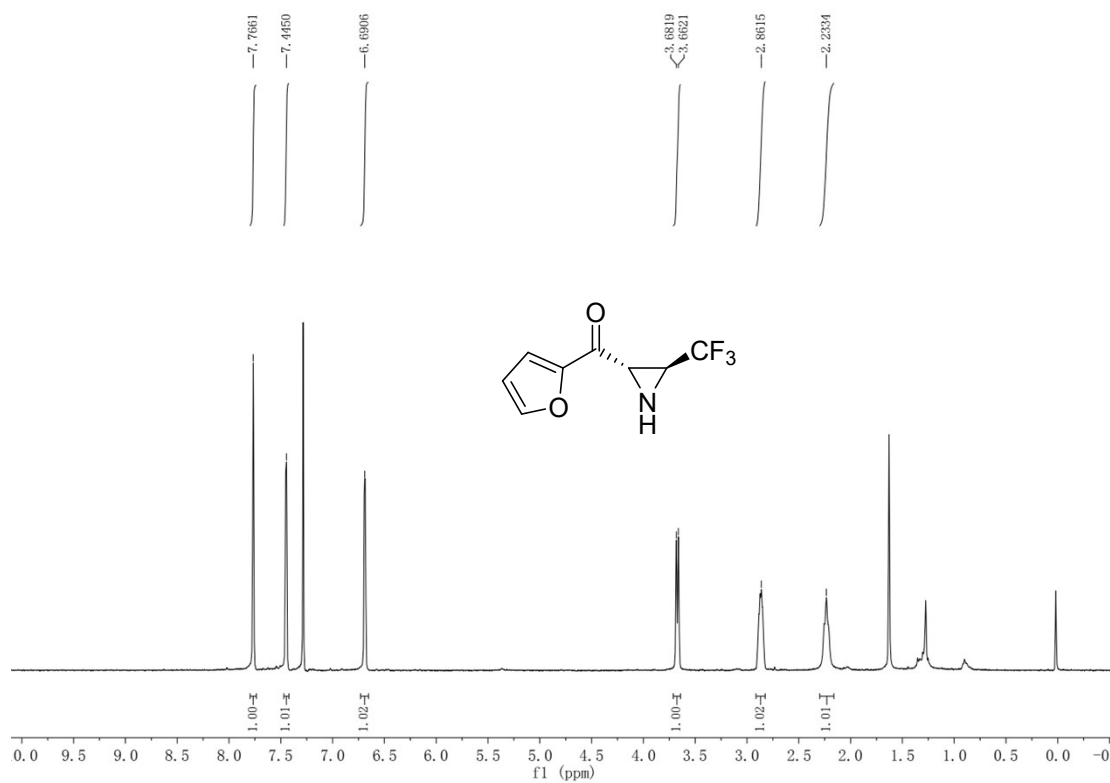



$^{13}\text{C}$  NMR (100 MHz,  $\text{CDCl}_3$ ) of **2t**:

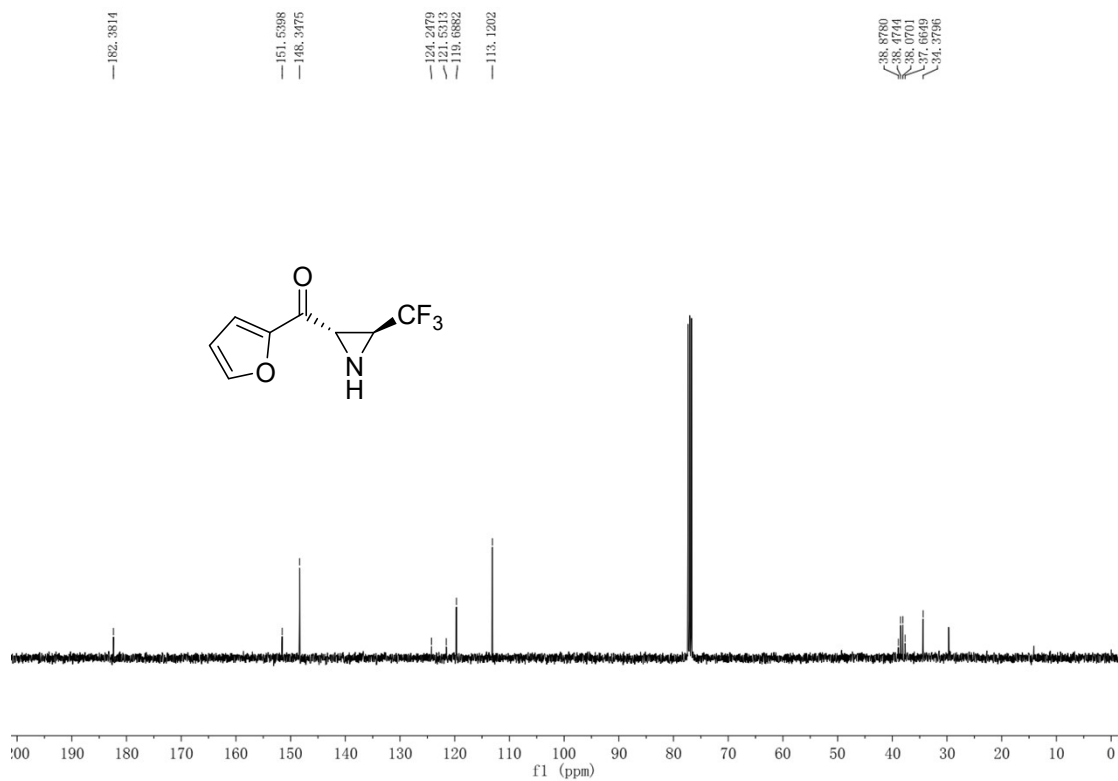

$^{19}\text{F}$  NMR (376 MHz,  $\text{CDCl}_3$ ) of **2t**:

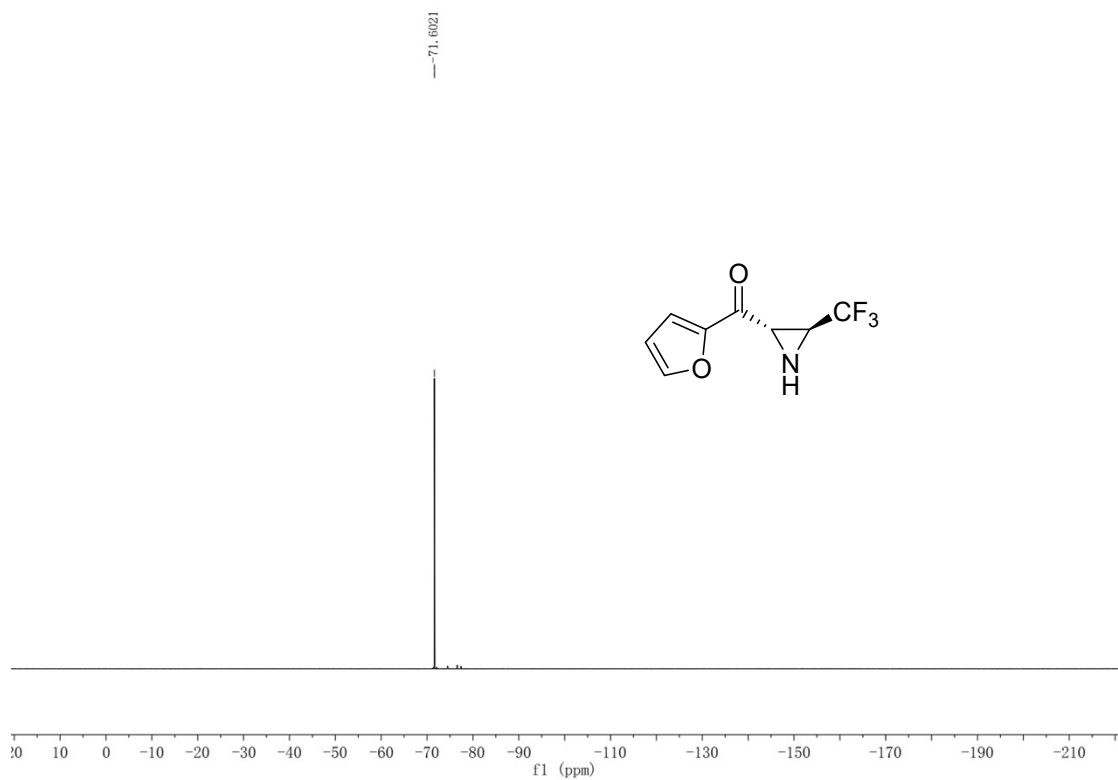

$^1\text{H}$  NMR (400 MHz,  $\text{CDCl}_3$ ) of **2u**:

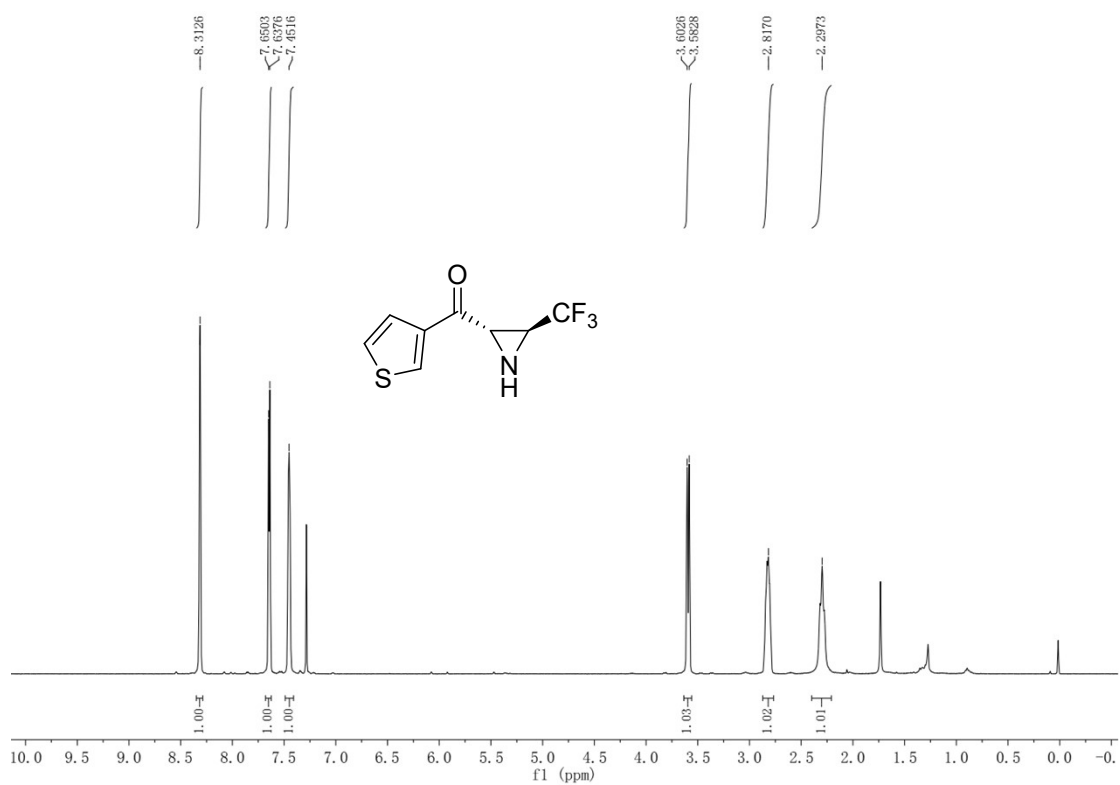

$^{13}\text{C}$  NMR (100 MHz,  $\text{CDCl}_3$ ) of **2u**:

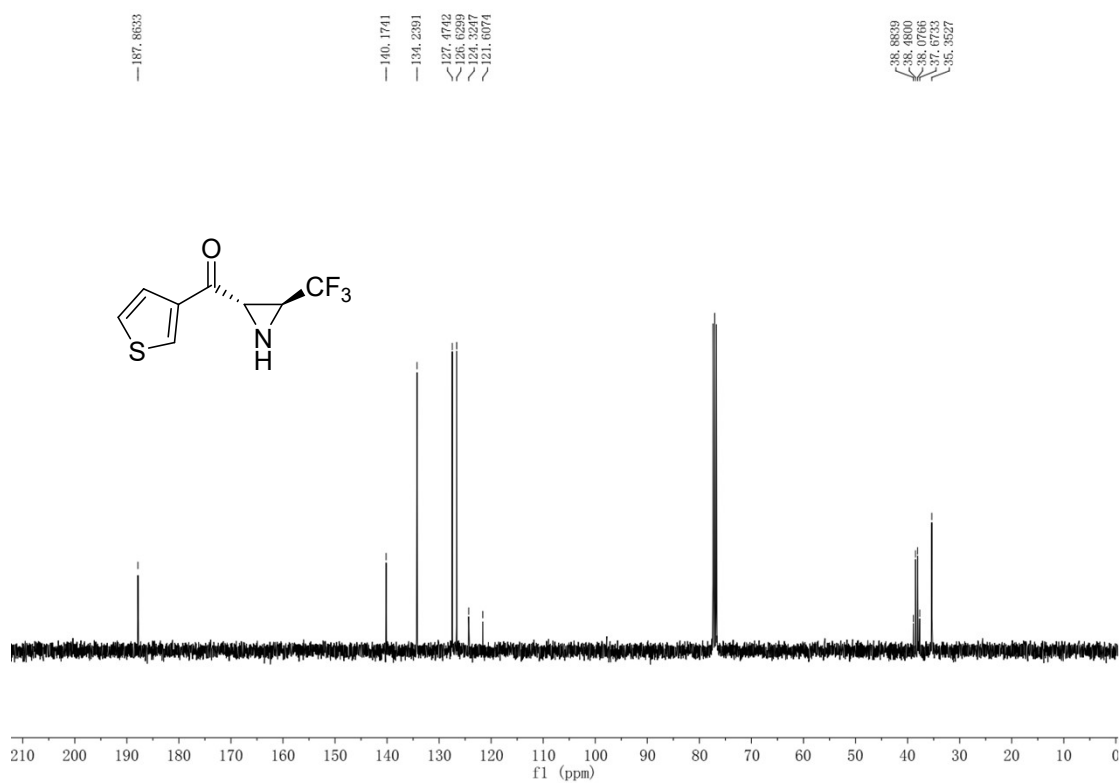

$^{19}\text{F}$  NMR (376 MHz,  $\text{CDCl}_3$ ) of **2u**:

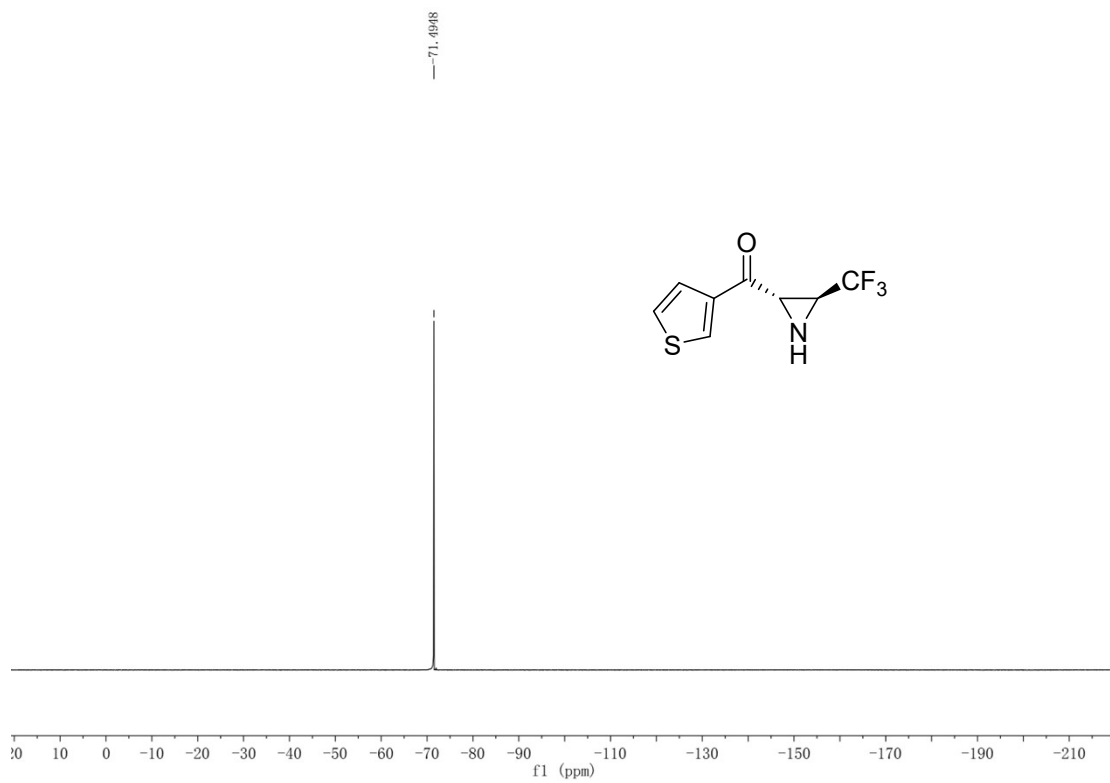

Supplement: d3ob00714f1.pdf [file d3ob00714f1.pdf]
